# Supplementary material for: Fluoroarylation ofgem-difluorostyrenes through a Pd-catalysed aryl C–H bond activation cascade
Source: Royal Society of Chemistry journal article supplement (doi:10.1039/d3qo00814b), 2023-01-01
Supplement: d3qo00814b1.pdf [file d3qo00814b1.pdf]

## Supporting Information

### Fluoroarylation of gem-Difluorostyrenes through Pd-Catalyzed Aryl C–H Bond Activation Cascade

Lei Chen,<sup>a</sup> Jun Pu,<sup>a</sup> Peng Ye,<sup>a</sup> Shuang Wang,<sup>a</sup> Yang-Jie Mao,<sup>a</sup> Zhen-Yuan Xu,<sup>a</sup> Shao-Jie Lou,<sup>\*a</sup> and Dan-Qian Xu,<sup>\*a</sup>

<sup>a</sup>State Key Laboratory Breeding Base of Green Chemistry-Synthesis Technology, Key Laboratory of Green Pesticides and Cleaner Production Technology of Zhejiang Province, Zhejiang University of Technology, Hangzhou 310014, China.

E-mail: chrc@zjut.edu.cn (D.-Q. Xu); loushaojie@zjut.edu.cn (S.-J. Lou)

### Content

|                                                                                |    |
|--------------------------------------------------------------------------------|----|
| I. General .....                                                               | 1  |
| II. Preparation of the starting materials .....                                | 1  |
| III. General procedure for the palladium-catalyzed fluoroarylation .....       | 2  |
| IV. Gram scale-up experiment of <b>1a</b> .....                                | 2  |
| V. Conditions screening for fluoroheteroarylation of gem-difluoroalkenes ..... | 3  |
| VI. Deuterium-labeling experiments .....                                       | 3  |
| VII. Characterization of all products .....                                    | 8  |
| VIII. X-Ray data for <b>2q</b> and <b>2x</b> .....                             | 20 |
| IX. References .....                                                           | 22 |
| X. NMR spectra .....                                                           | 23 |

## I. General

Unless otherwise stated, all experiments were carried out under nitrogen atmosphere. The reagents and solvents were purchased from commercial suppliers and used without further purification unless noted.  $^1\text{H}$  NMR and  $^{13}\text{C}$  NMR spectra were obtained on Bruker AVANCE III 400 instrument in  $\text{CDCl}_3$  using TMS as an internal standard, operating at 400 MHz and 101 MHz, respectively. Chemical shifts ( $\delta$ ) are expressed in ppm and coupling constants  $J$  are given in Hz. For  $\text{CDCl}_3$ , the chemical shifts are reported as parts per million (ppm) to residual protium or carbon of the solvents;  $\text{CHCl}_3$   $\delta$  H (7.28 ppm) and  $\text{CDCl}_3$   $\delta$  C (77.03 ppm).  $^{19}\text{F}$  NMR were recorded on a Bruker AVANCE III 400. Multiplicities are reported using the following abbreviations: s = singlet, d = doublet, t = triplet, q = quartlet, dd = doublet of doublets, td = triplet of doublets, ddd = doublet of doublet of doublets, m = multiplet. GC experiments were carried out using Agilent 7890B GC. GC-MS experiments that used dodecane as an internal standard were performed with a Thermo DSQ II, Trace GC Ultra. High resolution mass spectra [HRMS (ESI-TOF)] were obtained on an Agilent 6545 Q-TOF LCMS spectrometer equipped with an ESI source.

## II. Preparation of the starting materials

### 1. General procedure for the synthesis of 1

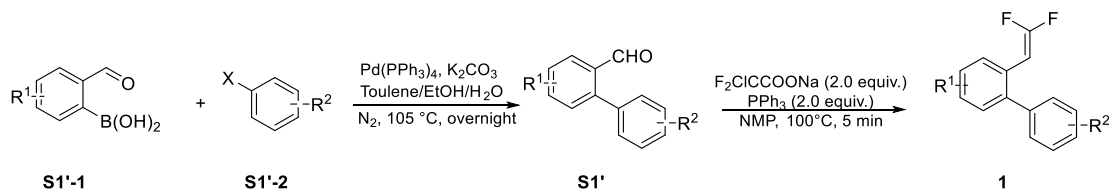

X = Br or I

To a solution of **S1'-1** (5.0 mmol, 1 equiv.) and **S1'-2** (5.5 mmol, 1.1 equiv.) in toluene (8 mL), ethanol (2 mL) and water (2 mL),  $\text{Pd(PPh}_3)_4$  (3 mol%) and  $\text{K}_2\text{CO}_3$  (12.5 mmol, 2.5 equiv.) were added. The resulting mixture was reflux overnight under a nitrogen atmosphere. After completion of the reaction, the mixture was extracted three times with diethyl ether. The combined organic phases were dried over anhydrous  $\text{Na}_2\text{SO}_4$ , filtered and concentrated under reduced pressure. The crude product was purified by silica gel column chromatography to deliver **S1'**.<sup>1</sup>

In a 50 mL oven-dried round-bottom flask with a stir bar, the **S1'** (1.0 equiv.), triphenyl phosphine (8 mmol, 2.0 equiv.) were dissolved in NMP (25 mL), then the mixture was heated to 100 °C. To the reaction mixture at 100 °C was added sodium 2-chloro-2,2-difluoroacetate (8 mmol, 2.0 equiv.) slowly (**Caution:** gas evolution observed). After the reaction finished according to the TLC, the reaction mixture was cooled to room temperature, quenched with water and extracted with EtOAc. The combined organic layers were washed with  $\text{H}_2\text{O}_2$  (30 wt% in water, 10 mL), brine (50 mL  $\times$  4) and dried over  $\text{Na}_2\text{SO}_4$ . After solvent was removed under reduced pressure, the crude residue was purified by column chromatography on silica gel to afford the **1**.<sup>2</sup>

### III. General procedure for the palladium-catalyzed fluoroarylation

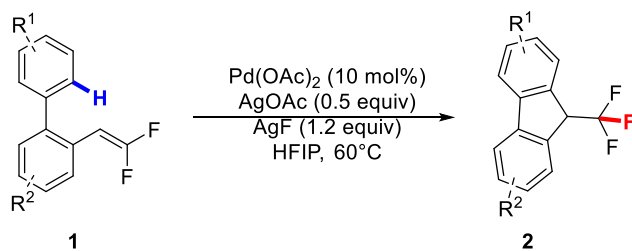

In an oven-dried 10 mL Schlenk tube equipped with a stir bar, Pd(OAc)<sub>2</sub> (10 mol%), AgOAc (0.5 equiv.), AgF (1.2 equiv.), **1** (0.2 mmol) and anhydrous HFIP (1.0 mL) were added under N<sub>2</sub> atmosphere and then the reaction tube was capped. After stirring at 60 °C for 4 h, the mixture was passed through a short pad of celite and rinsed with EtOAc. The filtrate was evaporated to dryness under reduced pressure and the crude residue was purified by column chromatography on silica gel to afford the desired product **2**.

### IV. Gram scale-up experiment of 1a

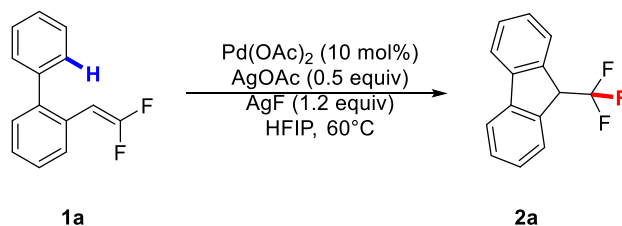

In an oven-dried 50 mL Schlenk tube equipped with a stir bar, Pd(OAc)<sub>2</sub> (0.11 g, 10 mol%), AgOAc (0.42 g, 0.5 equiv.), AgF (0.76 g, 1.2 equiv.), **1a** (1.08 g, 5.0 mmol) and anhydrous HFIP (10.0 mL) were added under N<sub>2</sub> atmosphere and then the reaction tube was capped. After stirring at 60 °C for 12 h, the mixture was passed through a short pad of celite and rinsed with EtOAc. The filtrate was evaporated to dryness under reduced pressure and the crude residue was purified by column chromatography on silica gel (petroleum ether-EtOAc = 100:1) to afford the desired product **2a** (0.85 g, 3.65 mmol, 73%).

## V. Conditions screening for fluoroheteroarylation of gem-difluoroalkenes

Table S1. Reaction condition optimization

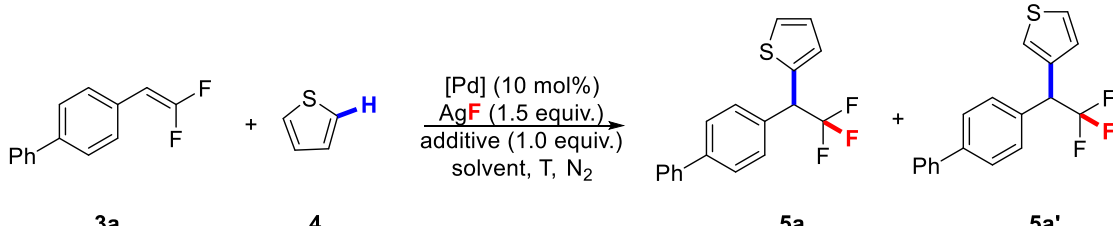

| Entry | [Cat.]                                              | Additive                        | T.  | Ligand            | Solvent     | Yield <sup>a</sup> | 5a:5a' <sup>b</sup> |
|-------|-----------------------------------------------------|---------------------------------|-----|-------------------|-------------|--------------------|---------------------|
| 1     | [allylPdCl] <sub>2</sub>                            | /                               | 80  | XPhos             | cyclohexane | N.R.               | /                   |
| 2     | [allylPdCl] <sub>2</sub>                            | /                               | 100 | XPhos             | cyclohexane | N.R.               | /                   |
| 3     | [allylPdCl] <sub>2</sub>                            | /                               | 100 | XPhos             | 1,4-dioxane | N.R.               | /                   |
| 4     | [allylPdCl] <sub>2</sub>                            | AgOAc                           | 60  | /                 | HFIP        | 72                 | 77:23               |
| 5     | Pd(OAc) <sub>2</sub>                                | AgOAc                           | 60  | /                 | HFIP        | 72                 | 80:20               |
| 6     | Pd(Ph <sub>3</sub> P) <sub>2</sub> Cl <sub>2</sub>  | AgOAc                           | 60  | /                 | HFIP        | 63                 | 80:20               |
| 7     | Pd(TFA) <sub>2</sub>                                | AgOAc                           | 60  | /                 | HFIP        | 65                 | 78:22               |
| 8     | Pd(CH <sub>3</sub> CN) <sub>2</sub> Cl <sub>2</sub> | AgOAc                           | 60  | /                 | HFIP        | 67                 | 75:25               |
| 9     | Pd(OAc) <sub>2</sub>                                | AgOAc                           | 40  | /                 | HFIP        | 30                 | 85:15               |
| 10    | Pd(OAc) <sub>2</sub>                                | AgOAc                           | 25  | /                 | HFIP        | 17                 | 84:16               |
| 11    | Pd(OAc) <sub>2</sub>                                | AgOAc                           | 80  | /                 | HFIP        | 75                 | 75:25               |
| 12    | Pd(OAc) <sub>2</sub>                                | Ag <sub>2</sub> CO <sub>3</sub> | 60  | /                 | HFIP        | 34                 | 76:24               |
| 13    | Pd(OAc) <sub>2</sub>                                | AgOAc                           | 60  | Ph <sub>3</sub> P | HFIP        | 65                 | 78:22               |
| 14    | Pd(OAc) <sub>2</sub>                                | AgOAc                           | 60  | XPhos             | HFIP        | 70                 | 80:20               |
| 15    | Pd(OAc) <sub>2</sub>                                | AgOAc                           | 60  | Xantphos          | HFIP        | 68                 | 75:25               |
| 16    | Pd(OAc) <sub>2</sub>                                | AgOAc                           | 60  | /                 | TFE         | trace              | /                   |
| 17    | Pd(OAc) <sub>2</sub>                                | AgOAc                           | 60  | /                 | IPA         | N.R.               | /                   |

<sup>a</sup>Reaction conditions: **3a** (0.2 mmol), **4** (0.3 mmol), [Pd] (10 mol%), AgF (1.5 equiv.), additive (1.0 equiv.), Solvent (1 mL), under N<sub>2</sub>, 12h, GC-MS yield. <sup>b</sup>Regioselectivity was determined by GC-MS.

## VI. Deuterium-labeling experiments

### 1. Synthesis of 1-bromobenzene-2-*d*

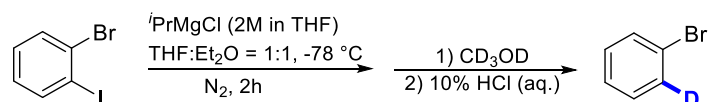

1-Bromo-2-iodobenzene (10 mmol, 1 equiv.) was dissolved in a mixture of THF and Et<sub>2</sub>O (50 mL, 1:1) under argon atmosphere and cooled to -78 °C. 5.1 mL (10.2 mmol, 1.02 equiv.) isopropyl magnesium chloride (2 M in THF) were added dropwise under vigorous stirring over 15 minutes. The reaction mixture was stirred for 2 h at -78 °C before adding 1.2 mL methanol-*d*<sub>4</sub> and slowly warming it up to room temperature. After the addition of 50 mL 10% aq. HCl and stirring the mixture for 30 minutes, the organic layer was removed and the aqueous layer was extracted 3 times with 10

mL Et<sub>2</sub>O and the combined organic layers were dried over MgSO<sub>4</sub>. The solvent was removed under reduced pressure and the crude product was used directly for the next step without further purification.<sup>1</sup>

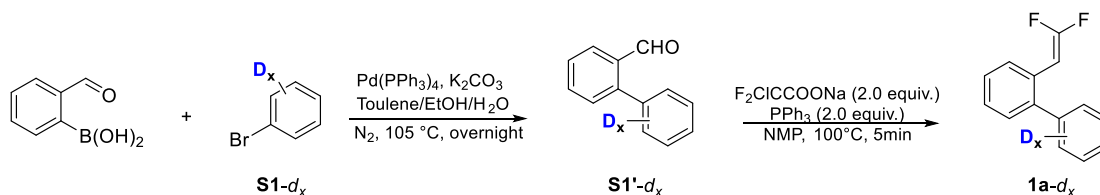

To a solution of boronic acid (5.0 mmol, 1 equiv.) and **S1-*d*<sub>1</sub>** or **S1-*d*<sub>5</sub>** (5.5 mmol, 1.1 equiv.) in toluene (8 mL), ethanol (2 mL) and water (2 mL), Pd(PPh<sub>3</sub>)<sub>4</sub> (3 mol%) and K<sub>2</sub>CO<sub>3</sub> (12.5 mmol, 2.5 equiv.) were added. The resulting mixture was reflux overnight under a nitrogen atmosphere. After completion of the reaction, the mixture was extracted three times with diethyl ether. The combined organic phases were dried over anhydrous Na<sub>2</sub>SO<sub>4</sub>, filtered and concentrated under reduced pressure. The crude product was purified by silica gel column chromatography to deliver **S1'-*d*<sub>1</sub>** or **S1'-*d*<sub>5</sub>**.<sup>1</sup>

In a 50 mL oven-dried round-bottom flask with a stir bar, the **S1'-*d*<sub>1</sub>** or **S1'-*d*<sub>5</sub>** (1.0 equiv.), triphenyl phosphine (8 mmol, 2.0 equiv.) were dissolved in NMP (25 mL), then the mixture was heated to 100 °C. To the reaction mixture at 100 °C was added sodium 2-chloro-2,2-difluoroacetate (8 mmol, 2.0 equiv.) slowly (**Caution:** gas evolution observed). After the reaction finished according to the TLC, the reaction mixture was cooled to room temperature, quenched with water and extracted with EtOAc. The combined organic layers were washed with H<sub>2</sub>O<sub>2</sub> (30 wt% in water, 10 mL), brine (50 mL × 4) and dried over Na<sub>2</sub>SO<sub>4</sub>. After solvent was removed under reduced pressure, the crude residue was purified by column chromatography on silica gel to afford the **1a-*d*<sub>1</sub>** or **1a-*d*<sub>5</sub>**.

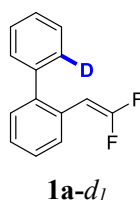

**2-(2,2-difluorovinyl)-1,1'-biphenyl-2'-*d*<sub>1</sub> (1a-*d*<sub>1</sub>):** <sup>1</sup>H NMR (400 MHz, CDCl<sub>3</sub>) δ 7.65 (d, *J* = 7.6 Hz, 1H), 7.55-7.31 (m, 7H), 5.26 (dd, *J* = 26.1, 4.2 Hz, 1H).

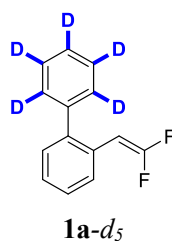

**2-(2,2-difluorovinyl)-1,1'-biphenyl-2',3',4',5',6'-*d*<sub>5</sub> (1a-*d*<sub>5</sub>):** <sup>1</sup>H NMR (400 MHz, CDCl<sub>3</sub>) δ 7.66 (d, *J* = 7.6 Hz, 1H), 7.44-7.29 (m, 3H), 5.27 (dd, *J* = 26.1, 4.2 Hz, 1H).

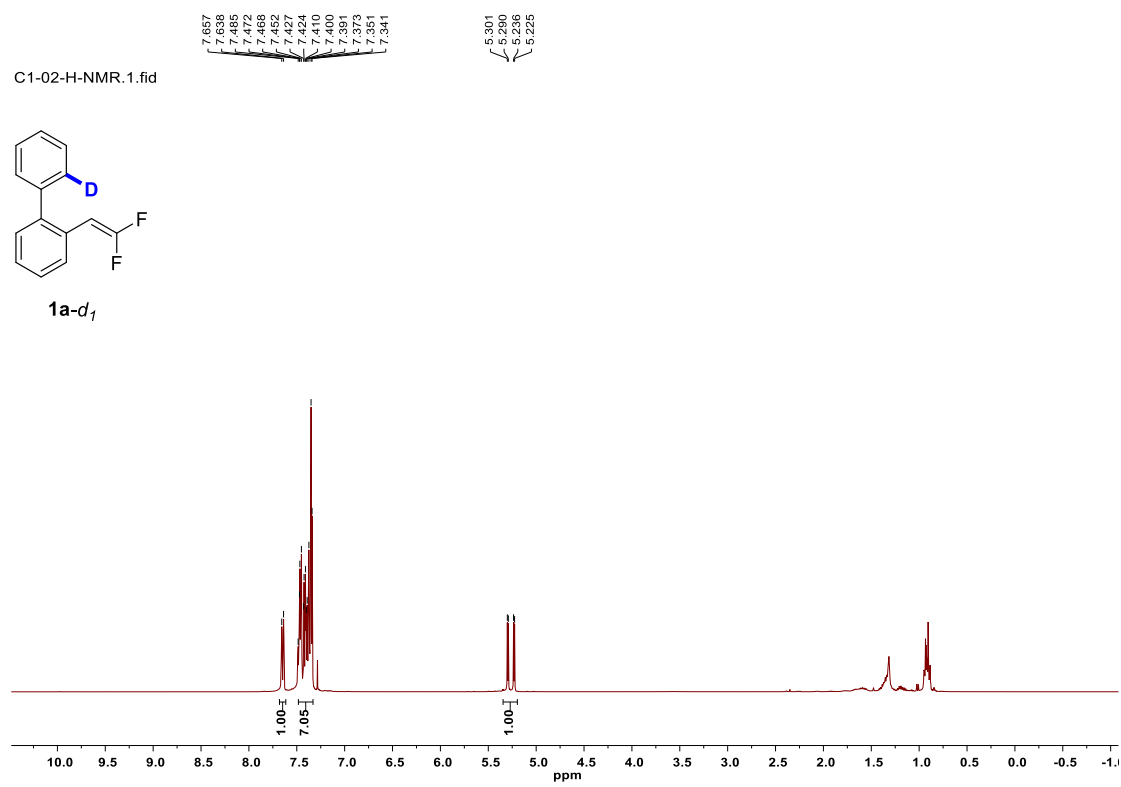

Figure S1. <sup>1</sup>H NMR spectrum of **1a-d<sub>1</sub>**

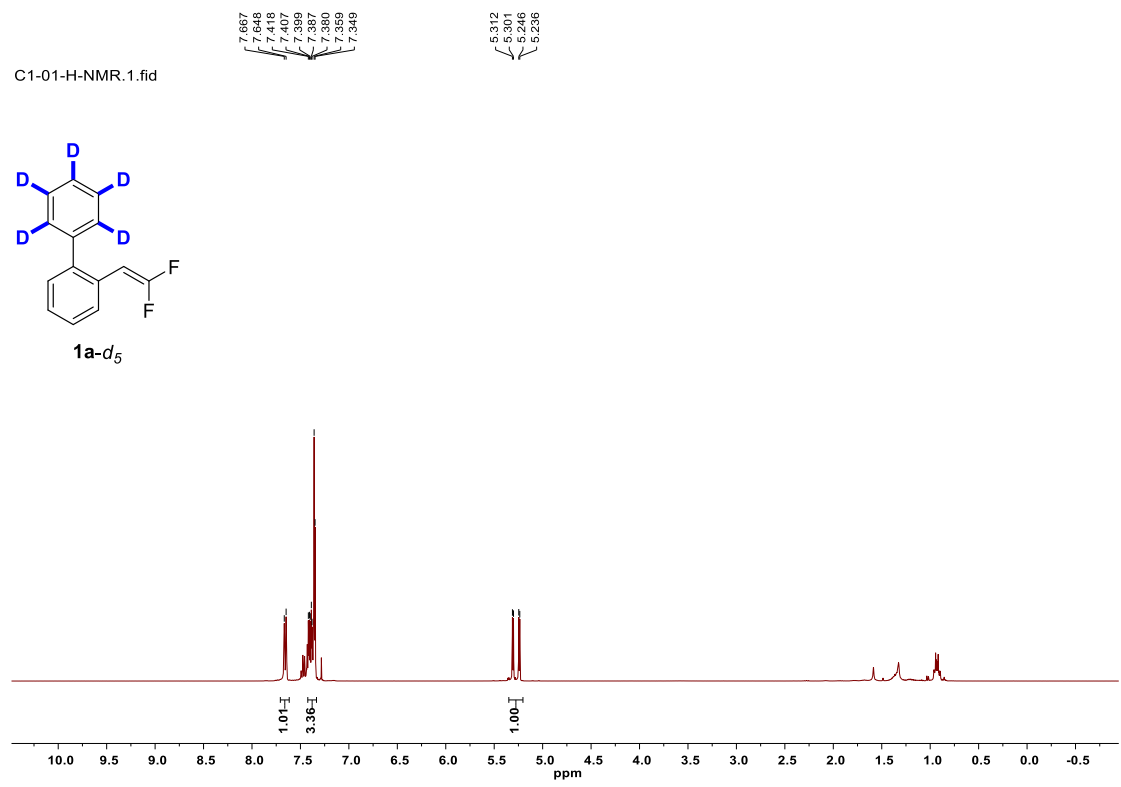

Figure S2. <sup>1</sup>H NMR spectrum of **1a-d<sub>5</sub>**

## 2. Intramolecular KIE experiments

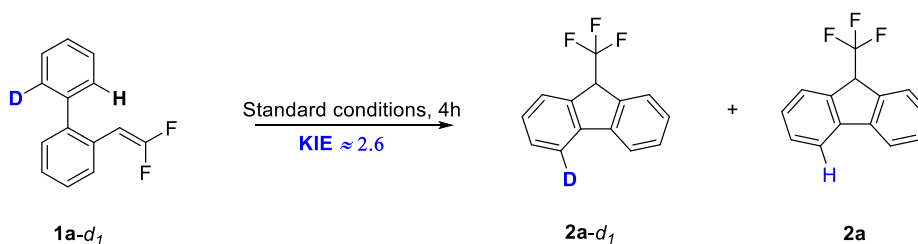

In an oven-dried 10 mL Schlenk tube equipped with a stir bar, Pd(OAc)<sub>2</sub> (10 mol%), AgOAc (0.5 equiv.), AgF (1.2 equiv.), **1a-d<sub>1</sub>** (0.2 mmol) and anhydrous HFIP (1.0 mL) were added under N<sub>2</sub> atmosphere and then the reaction tube was capped. After stirring at 60 °C for 4 h, the mixture was passed through a short pad of celite and rinsed with EtOAc. The filtrate was evaporated to dryness under reduced pressure and the crude residue was purified by column chromatography on silica gel (PE:EtOAc = 100:1) to afford the desired product **2a-d<sub>1</sub>** and **2a** (white solid, 0.036 g, 78% yield). The 2.6:1 ratio of **2a-d<sub>1</sub>** to **2a** indicated that the current palladium-catalyzed fluoroarylation reaction may involve the aromatic C–H activation pathway.

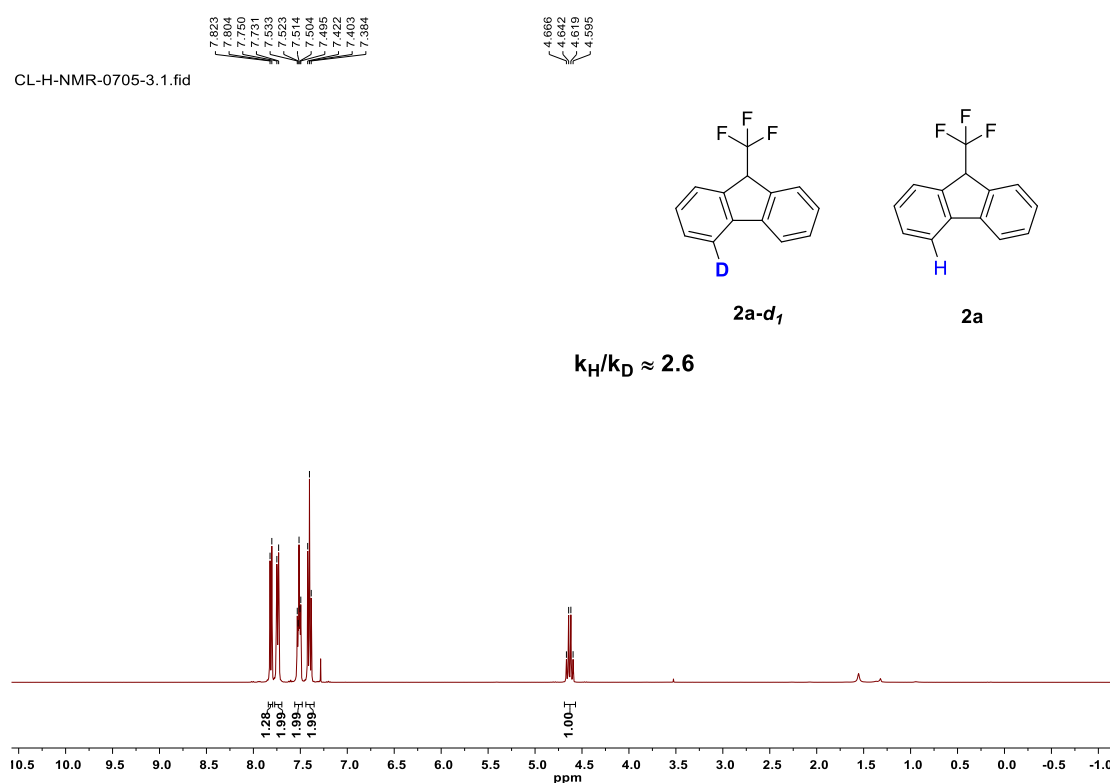

Fig S3. <sup>1</sup>H NMR spectrum of mixture **2a/2a-d<sub>1</sub>**

### 3. Intermolecular competing KIE experiments

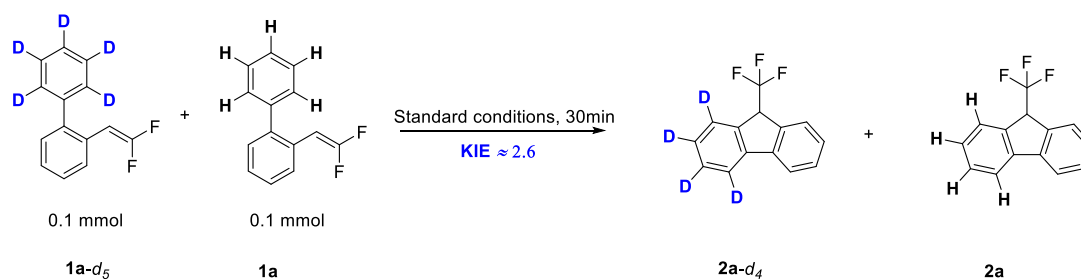

In an oven-dried 10 mL Schlenk tube equipped with a stir bar, Pd(OAc)<sub>2</sub> (10 mol%), AgOAc (0.5 equiv.), AgF (1.2 equiv.), **1a-d<sub>5</sub>** (0.1 mmol), **1a** (0.1 mmol) and anhydrous HFIP (1.0 mL) were added under N<sub>2</sub> atmosphere and then the reaction tube was capped. After stirring at 60 °C for 30 min, the mixture was passed through a short pad of celite and rinsed with EtOAc. The filtrate was evaporated to dryness under reduced pressure and the crude residue was purified by column chromatography on silica gel (PE:EtOAc = 100:1) to afford the desired product **2a-d<sub>4</sub>** and **2a** (white solid, 0.023 g, 50% yield). The 2.6:1 ratio of **2a** to **2a-d<sub>4</sub>** demonstrated that the cleavage of the aromatic C–H bond in **1a** is involved in the rate-determining step.

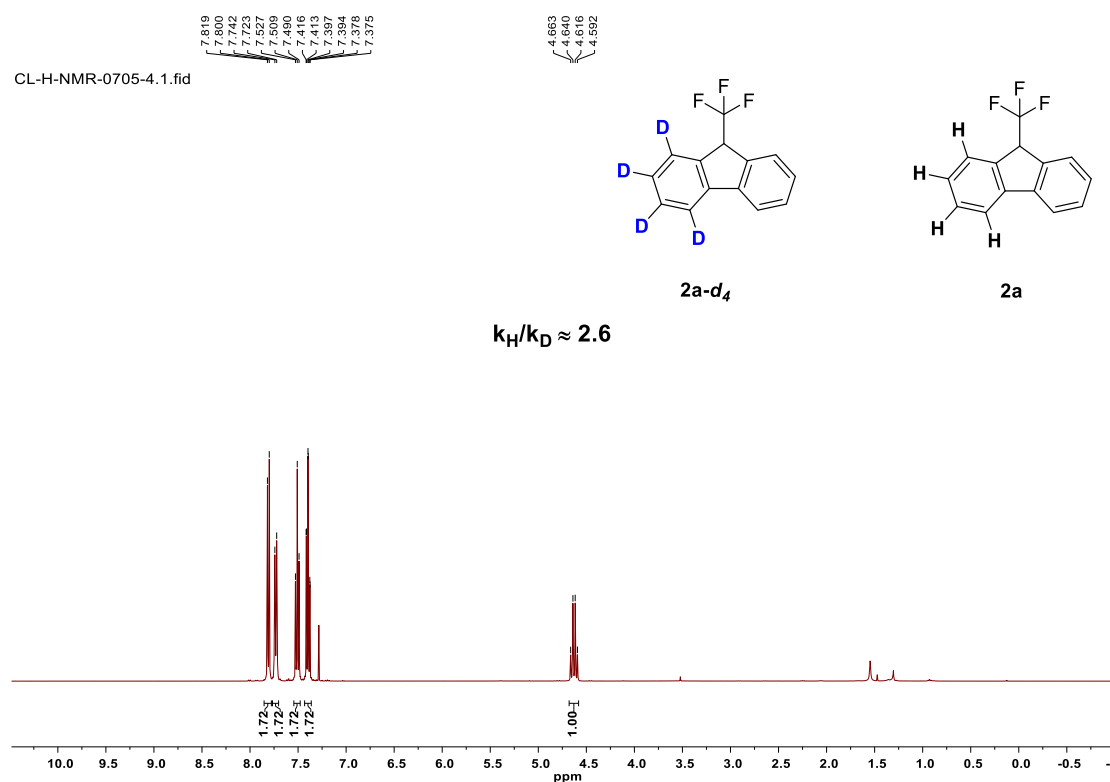

Fig S4. <sup>1</sup>H NMR spectrum of mixture **2a/2a-d<sub>4</sub>**



#### 4. Radical trapping experiments

Table S2. Radical trapping experiments with radical scavengers

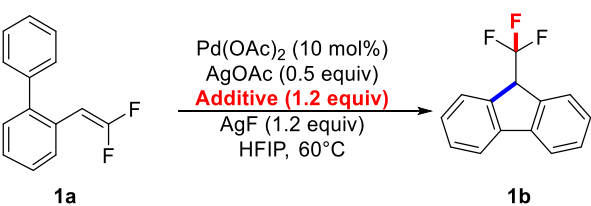

| Entry | additive                  | yield |
|-------|---------------------------|-------|
| 1     | TEMPO                     | 62%   |
| 2     | ethene-1,1-diyl dibenzene | 67%   |

In an oven-dried 10 mL Schlenk tube equipped with a stir bar, Pd(OAc)<sub>2</sub> (10 mol%), AgOAc (0.5 equiv.), AgF (1.2 equiv.), additive (1.2 equiv.), **1a** (0.1 mmol) and anhydrous HFIP (1.0 mL) were added under N<sub>2</sub> atmosphere and then the reaction tube was capped. After stirring at 60 °C for 4 h. The yields were determined by GC-MS. Radical trapping experiments demonstrated that the reaction mechanism does not involve radical process.

#### VII. Characterization of all products

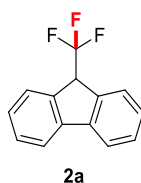

**9-(trifluoromethyl)-9H-fluorene (2a)**: Flash column chromatography on a silica gel (petroleum ether-EtOAc = 100:1) gave **2a** (38.3mg, 82% yield) as white solid; <sup>1</sup>H NMR (400 MHz, CDCl<sub>3</sub>) δ 7.81 (d, *J* = 7.6 Hz, 2H), 7.74 (d, *J* = 7.6 Hz, 2H), 7.51 (t, *J* = 7.5 Hz, 2H), 7.40 (tt, *J* = 7.5, 1.1 Hz, 2H), 4.63 (q, *J* = 9.4 Hz, 1H) ppm; <sup>13</sup>C NMR (101 MHz, CDCl<sub>3</sub>) δ 142.2, 137.3 (q, *J* = 2.2 Hz), 129.1, 127.7 (q, *J* = 278.5 Hz), 127.6, 125.9 (d, *J* = 1.5 Hz), 120.2, 51.3 (q, *J* = 29.3 Hz) ppm; <sup>19</sup>F NMR (376 MHz, CDCl<sub>3</sub>) δ -67.75 (s, 3F) ppm; HRMS (ESI-TOF) *m/z*: [M - H]<sup>-</sup> Calcd. for C<sub>14</sub>H<sub>8</sub>F<sub>3</sub>: 233.0584; found: 233.0588.

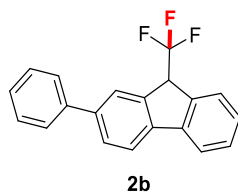

**2-phenyl-9-(trifluoromethyl)-9H-fluorene (2b)**: Flash column chromatography on a silica gel (petroleum ether-EtOAc = 100:1) gave **2b** (39.6 mg, 64% yield) as white solid; <sup>1</sup>H NMR (400 MHz, CDCl<sub>3</sub>) δ 7.99 (s, 1H), 7.91-7.83 (m, 2H), 7.81-7.75 (m, 2H), 7.74 (d, *J* = 1.3 Hz, 1H), 7.72 (s, 1H), 7.59-7.52 (m, 3H), 7.49-7.41 (m, 2H), 4.69 (q, *J* = 9.4 Hz, 1H) ppm; <sup>13</sup>C NMR (101 MHz, CDCl<sub>3</sub>) δ 141.9, 141.3, 141.0, 140.9, 138.1 (q, *J* = 2.1 Hz), 137.6 (q, *J* = 2.1 Hz), 129.2, 128.9, 128.3, 127.7, 127.6, 127.3,

126.4 (q,  $J = 278.8$  Hz), 126.0, 125.0, 120.5, 120.3, 51.4 (q,  $J = 29.2$  Hz) ppm;  $^{19}\text{F}$  NMR (376 MHz,  $\text{CDCl}_3$ )  $\delta$  -67.50 (d,  $J = 3.6$  Hz, 3F) ppm; HRMS (ESI-TOF)  $m/z$ :  $[\text{M} - \text{H}]^-$  Calcd. for  $\text{C}_{20}\text{H}_{12}\text{F}_3$ : 309.0897; found: 309.0897.

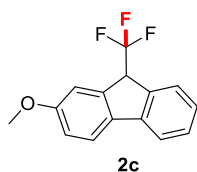

**2-methoxy-9-(trifluoromethyl)-9H-fluorene (2c)**: Flash column chromatography on a silica gel (petroleum ether-EtOAc = 50:1) gave **2c** (40.6 mg, 77% yield) as white solid;  $^1\text{H}$  NMR (400 MHz,  $\text{CDCl}_3$ )  $\delta$  7.76-7.64 (m, 3H), 7.47 (t,  $J = 7.6$  Hz, 1H), 7.32 (t,  $J = 7.5$  Hz, 1H), 7.28 (s, 1H), 7.05 (dd,  $J = 8.4, 2.4$  Hz, 1H), 4.57 (q,  $J = 9.5$  Hz, 1H), 3.91 (s, 3H) ppm;  $^{13}\text{C}$  NMR (101 MHz,  $\text{CDCl}_3$ )  $\delta$  159.8, 142.2, 139.0 (q,  $J = 2.0$  Hz), 136.8 (q,  $J = 2.3$  Hz), 135.0, 129.0, 126.5, 126.3 (q,  $J = 278.7$  Hz), 125.8 (d,  $J = 1.6$  Hz), 120.9, 119.4, 115.0, 111.8 (d,  $J = 1.5$  Hz), 55.6, 51.3 (q,  $J = 29.2$  Hz) ppm;  $^{19}\text{F}$  NMR (376 MHz, Chloroform-*d*)  $\delta$  -67.84 (s, 3F) ppm; HRMS (ESI-TOF)  $m/z$ :  $[\text{M} - \text{H}]^-$  Calcd. for  $\text{C}_{15}\text{H}_{10}\text{F}_3\text{O}$ : 263.0689; found: 263.0683.

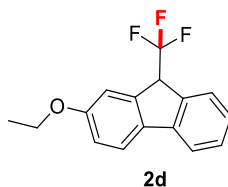

**2-ethoxy-9-(trifluoromethyl)-9H-fluorene (2d)**: Flash column chromatography on a silica gel (petroleum ether-EtOAc = 50:1) gave **2d** (46.1 mg, 83% yield) as white solid;  $^1\text{H}$  NMR (400 MHz,  $\text{CDCl}_3$ )  $\delta$  7.73-7.65 (m, 3H), 7.47 (t,  $J = 7.5$  Hz, 1H), 7.32 (t,  $J = 7.6$  Hz, 2H), 7.04 (dd,  $J = 8.4, 2.3$  Hz, 1H), 4.57 (q,  $J = 9.5$  Hz, 1H), 4.21-4.07 (m, 2H), 1.49 (t,  $J = 7.0$  Hz, 3H) ppm;  $^{13}\text{C}$  NMR (101 MHz,  $\text{CDCl}_3$ )  $\delta$  159.1, 142.2, 139.0 (q,  $J = 2.1$  Hz), 136.8 (q,  $J = 2.0$  Hz), 134.9, 129.0, 126.4, 126.3 (q,  $J = 278.7$  Hz), 125.8, 120.9, 119.4, 115.5, 112.3, 63.9, 51.2 (q,  $J = 29.2$  Hz), 14.8 ppm;  $^{19}\text{F}$  NMR (376 MHz,  $\text{CDCl}_3$ )  $\delta$  -67.83 (s, 3F) ppm; HRMS (ESI-TOF)  $m/z$ :  $[\text{M} - \text{H}]^-$  Calcd. for  $\text{C}_{16}\text{H}_{12}\text{F}_3\text{O}$ : 277.0846; found: 277.0848.

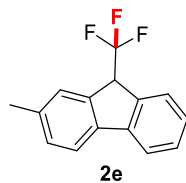

**2-methyl-9-(trifluoromethyl)-9H-fluorene (2e)**: Flash column chromatography on a silica gel (petroleum ether-EtOAc = 100:1) gave **2e** (43.1 mg, 87% yield) as white solid;  $^1\text{H}$  NMR (400 MHz,  $\text{CDCl}_3$ )  $\delta$  7.76 (d,  $J = 7.6$  Hz, 1H), 7.70 (t,  $J = 8.0$  Hz, 2H), 7.54 (s, 1H), 7.49 (t,  $J = 7.4$  Hz, 1H), 7.41-7.34 (m, 1H), 7.32 (d,  $J = 7.8$  Hz, 1H), 4.58 (q,  $J = 9.5$  Hz, 1H), 2.49 (s, 3H) ppm;  $^{13}\text{C}$  NMR (101 MHz,  $\text{CDCl}_3$ )  $\delta$  142.2, 139.5, 137.6, 137.5 (q,  $J = 2.3$  Hz), 137.1 (d,  $J = 2.4$  Hz), 129.8, 128.9, 127.1, 126.5, 126.4 (q,  $J = 278.7$  Hz), 125.9, 119.9, 119.9, 51.1 (q,  $J = 29.2$  Hz), 21.6 ppm;  $^{19}\text{F}$  NMR (376 MHz,

CDCl<sub>3</sub>)  $\delta$  -67.73 (s, 3F) ppm; **HRMS** (ESI-TOF)  $m/z$ : [M - H]<sup>-</sup> Calcd. for C<sub>15</sub>H<sub>10</sub>F<sub>3</sub>: 247.0740; found: 247.0747.

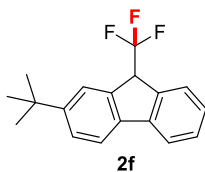

**2-(tert-butyl)-9-(trifluoromethyl)-9H-fluorene (2f)**: Flash column chromatography on a silica gel (petroleum ether-EtOAc = 100:1) gave **2f** (46.4 mg, 80% yield) as white solid; **<sup>1</sup>H NMR** (400 MHz, CDCl<sub>3</sub>)  $\delta$  7.85-7.66 (m, 4H), 7.54 (dd,  $J$  = 8.1, 1.6 Hz, 1H), 7.48 (t,  $J$  = 7.5 Hz, 1H), 7.35 (t,  $J$  = 7.5 Hz, 1H), 4.59 (q,  $J$  = 9.5 Hz, 1H), 1.42 (s, 9H) ppm; **<sup>13</sup>C NMR** (101 MHz, CDCl<sub>3</sub>)  $\delta$  151.1, 142.2, 139.5, 137.4 (d,  $J$  = 2.4 Hz), 137.3 (d,  $J$  = 2.3 Hz), 129.0, 127.1, 126.4 (q,  $J$  = 278.7 Hz), 126.2, 125.8, 122.8 (d,  $J$  = 1.2 Hz), 119.9, 119.7, 51.3 (q,  $J$  = 29.1 Hz), 35.0, 31.5 ppm; **<sup>19</sup>F NMR** (376 MHz, CDCl<sub>3</sub>)  $\delta$  -67.72 (s, 3F) ppm; **HRMS** (ESI-TOF)  $m/z$ : [M - H]<sup>-</sup> Calcd. for C<sub>18</sub>H<sub>16</sub>F<sub>3</sub>: 289.1210; found: 289.1215.

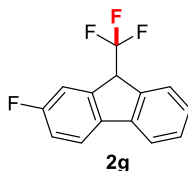

**2-fluoro-9-(trifluoromethyl)-9H-fluorene (2g)**: Flash column chromatography on a silica gel (petroleum ether-EtOAc = 100:1) gave **2g** (34.7 mg, 69% yield) as white solid; **<sup>1</sup>H NMR** (400 MHz, CDCl<sub>3</sub>)  $\delta$  7.79-7.66 (m, 3H), 7.50 (t,  $J$  = 7.5 Hz, 1H), 7.43 (d,  $J$  = 8.6 Hz, 1H), 7.38 (t,  $J$  = 7.5 Hz, 1H), 7.24-7.17 (m, 1H), 4.60 (q,  $J$  = 9.3 Hz, 1H) ppm; **<sup>13</sup>C NMR** (101 MHz, CDCl<sub>3</sub>)  $\delta$  163.8, 161.3, 141.3, 138.2 (d,  $J$  = 2.6 Hz), 137.1 (t,  $J$  = 2.0 Hz), 129.2, 126.0 (q,  $J$  = 278.8 Hz), 127.3, 125.9, 121.2 (d,  $J$  = 8.8 Hz), 119.9, 116.3 (d,  $J$  = 22.9 Hz), 113.6 (d,  $J$  = 23.0 Hz), 51.3 (q,  $J$  = 29.5 Hz) ppm; **<sup>19</sup>F NMR** (376 MHz, CDCl<sub>3</sub>)  $\delta$  -67.88 (s, 3F), -113.67 (s, 1F) ppm; **HRMS** (ESI-TOF)  $m/z$ : [M - H]<sup>-</sup> Calcd. for C<sub>14</sub>H<sub>6</sub>F<sub>4</sub>: 251.0489; found: 251.0492.

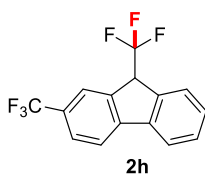

**2,9-bis(trifluoromethyl)-9H-fluorene (2h)**: Flash column chromatography on a silica gel (petroleum ether-EtOAc = 100:1) gave **2h** (37.4 mg, 62% yield) as white solid; **<sup>1</sup>H NMR** (400 MHz, CDCl<sub>3</sub>)  $\delta$  7.96 (s, 1H), 7.87 (dd,  $J$  = 13.6, 7.8 Hz, 2H), 7.81-7.74 (m, 2H), 7.55 (t,  $J$  = 7.5 Hz, 1H), 7.51-7.44 (m, 1H), 4.68 (q,  $J$  = 9.2 Hz, 1H) ppm; **<sup>13</sup>C NMR** (101 MHz, CDCl<sub>3</sub>)  $\delta$  145.6, 140.7, 137.9 (q,  $J$  = 2.2 Hz), 137.7 (q,  $J$  = 2.4 Hz), 129.9, 129.4, 128.9, 126.5 (q,  $J$  = 3.8 Hz), 126.1, 125.9 (d,  $J$  = 278.9 Hz), 125.5, 122.9 (q,  $J$  = 5.1 Hz), 121.0, 120.4, 51.3 (q,  $J$  = 29.8 Hz) ppm; **<sup>19</sup>F NMR** (376 MHz, CDCl<sub>3</sub>)  $\delta$  -62.03 (s, 3F), -67.67 (s, 3F) ppm; **HRMS** (ESI-TOF)  $m/z$ : [M - H]<sup>-</sup> Calcd. for C<sub>15</sub>H<sub>6</sub>F<sub>6</sub>: 301.0457; found: 301.0455.

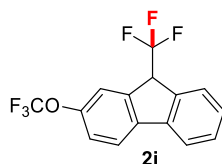

**2-(trifluoromethoxy)-9-(trifluoromethyl)-9H-fluorene (2i):** Flash column chromatography on a silica gel (petroleum ether-EtOAc = 100:1) gave **2i** (39.4 mg, 62% yield) as white solid;  $^1\text{H NMR}$  (400 MHz,  $\text{CDCl}_3$ )  $\delta$  7.83-7.76 (m, 2H), 7.73 (d,  $J = 7.7$  Hz, 1H), 7.58 (d,  $J = 2.2$  Hz, 1H), 7.52 (t,  $J = 7.5$  Hz, 1H), 7.43 (dd,  $J = 7.6, 1.2$  Hz, 1H), 7.41-7.35 (m, 1H), 4.63 (q,  $J = 9.3$  Hz, 1H) ppm;  $^{13}\text{C NMR}$  (101 MHz,  $\text{CDCl}_3$ )  $\delta$  148.7 (d,  $J = 1.5$  Hz), 140.9, 140.8, 138.9 (d,  $J = 2.2$  Hz), 137.4 (q,  $J = 1.9$  Hz), 129.3, 128.0, 126.0 (d,  $J = 1.6$  Hz), 125.9 (q,  $J = 278.8$  Hz), 122.1, 121.0, 120.6 (q,  $J = 257.4$  Hz), 120.4, 119.2, 51.3 (q,  $J = 29.8$  Hz) ppm;  $^{19}\text{F NMR}$  (376 MHz,  $\text{CDCl}_3$ )  $\delta$  -58.0 (s, 3F), -67.8 (s, 3F) ppm; **HRMS** (ESI-TOF)  $m/z$ : [M - H] $^-$  Calcd. for  $\text{C}_{15}\text{H}_6\text{F}_6\text{O}$ : 317.0407; found: 317.0408.

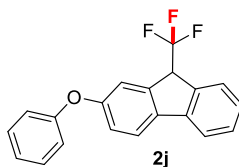

**2-phenoxy-9-(trifluoromethyl)-9H-fluorene (2j):** Flash column chromatography on a silica gel (petroleum ether-EtOAc = 50:1) gave **2j** (48.9 mg, 75% yield) as white solid;  $^1\text{H NMR}$  (400 MHz,  $\text{CDCl}_3$ )  $\delta$  7.76 (d,  $J = 1.9$  Hz, 1H), 7.75-7.69 (m, 2H), 7.50 (t,  $J = 7.5$  Hz, 1H), 7.44-7.34 (m, 4H), 7.24-7.07 (m, 4H), 4.60 (q,  $J = 9.4$  Hz, 1H) ppm;  $^{13}\text{C NMR}$  (101 MHz,  $\text{CDCl}_3$ )  $\delta$  157.2, 157.2, 141.7, 139.1 (q,  $J = 2.2$  Hz), 137.4, 137.2 (q,  $J = 2.0$  Hz), 129.9, 129.2, 127.0, 126.2 (q,  $J = 278.8$  Hz), 125.9 (d,  $J = 1.5$  Hz), 123.5, 121.1, 119.8, 119.8, 118.9, 116.9 (d,  $J = 1.4$  Hz), 51.3 (q,  $J = 29.4$  Hz) ppm;  $^{19}\text{F NMR}$  (376 MHz,  $\text{CDCl}_3$ )  $\delta$  -67.81 (s, 3F) ppm; **HRMS** (ESI-TOF)  $m/z$ : [M - H] $^-$  Calcd. for  $\text{C}_{20}\text{H}_{12}\text{F}_3\text{O}$ : 325.0846; found: 325.0843.

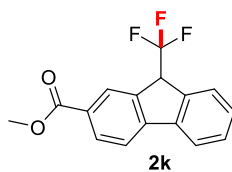

**methyl 9-(trifluoromethyl)-9H-fluorene-2-carboxylate (2k):** Flash column chromatography on a silica gel (petroleum ether-EtOAc = 50:1) gave **2k** (37.3 mg, 64% yield) as white solid;  $^1\text{H NMR}$  (400 MHz,  $\text{CDCl}_3$ )  $\delta$  8.38 (s, 1H), 8.26-8.17 (m, 1H), 7.91-7.81 (m, 2H), 7.75 (d,  $J = 7.6$  Hz, 1H), 7.53 (t,  $J = 7.4$  Hz, 1H), 7.49-7.41 (m, 1H), 4.66 (q,  $J = 9.3$  Hz, 1H), 3.98 (s, 3H) ppm;  $^{13}\text{C NMR}$  (101 MHz,  $\text{CDCl}_3$ )  $\delta$  166.8, 146.6, 141.0, 138.3 (d,  $J = 2.1$  Hz), 137.3 (d,  $J = 2.2$  Hz), 131.0, 129.4, 129.3, 128.8, 127.1 (d,  $J = 1.6$  Hz), 126.1, 126.0 (q,  $J = 278.9$  Hz), 121.1, 120.0, 52.2, 51.2 (q,  $J = 29.6$  Hz) ppm;  $^{19}\text{F NMR}$  (376 MHz,  $\text{CDCl}_3$ )  $\delta$  -67.61 (s, 3F) ppm; **HRMS** (ESI-TOF)  $m/z$ : [M - H] $^-$  Calcd. for  $\text{C}_{16}\text{H}_{10}\text{F}_3\text{O}_2$ : 291.0638; found: 291.0633.

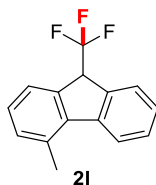

**4-methyl-9-(trifluoromethyl)-9H-fluorene (2l):** Flash column chromatography on a silica gel (petroleum ether-EtOAc = 100:1) gave **2l** (36.2 mg, 73% yield) as white solid;  $^1\text{H NMR}$  (400 MHz,  $\text{CDCl}_3$ )  $\delta$  7.96 (d,  $J = 7.8$  Hz, 1H), 7.77 (d,  $J = 7.6$  Hz, 1H), 7.60 (d,  $J = 6.1$  Hz, 1H), 7.53 (t,  $J = 7.8$  Hz, 1H), 7.40 (t,  $J = 7.5$  Hz, 1H), 7.32-7.27 (m, 2H), 4.61 (q,  $J = 9.4$  Hz, 1H), 2.76 (s, 3H) ppm;  $^{13}\text{C NMR}$  (101 MHz,  $\text{CDCl}_3$ )  $\delta$  143.2, 140.2, 137.6 (q,  $J = 2.2$  Hz), 133.4, 131.5, 129.0, 127.2, 126.9, 126.4 (q,  $J = 278.8$  Hz), 125.9, 123.4, 123.4 (d,  $J = 1.8$  Hz), 51.1 (q,  $J = 28.9$  Hz), 21.0 ppm;  $^{19}\text{F NMR}$  (376 MHz,  $\text{CDCl}_3$ )  $\delta$  -67.76 (s, 3F) ppm; **HRMS** (ESI-TOF)  $m/z$ :  $[\text{M} - \text{H}]^-$  Calcd. for  $\text{C}_{15}\text{H}_{10}\text{F}_3$ : 247.0740; found: 247.0744.

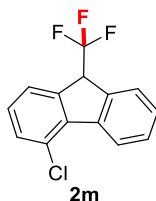

**4-chloro-9-(trifluoromethyl)-9H-fluorene (2m):** Flash column chromatography on a silica gel (petroleum ether-EtOAc = 100:1) gave **2m** (18.7 mg, 35% yield) as white solid;  $^1\text{H NMR}$  (400 MHz,  $\text{CDCl}_3$ )  $\delta$  8.49 (d,  $J = 7.8$  Hz, 1H), 7.74 (d,  $J = 7.6$  Hz, 1H), 7.66-7.62 (m, 1H), 7.55 (t,  $J = 7.5$  Hz, 1H), 7.50-7.42 (m, 2H), 7.37-7.27 (m, 1H), 4.64 (q,  $J = 9.3$  Hz, 1H) ppm;  $^{13}\text{C NMR}$  (101 MHz,  $\text{CDCl}_3$ )  $\delta$  140.9, 139.5 (q,  $J = 2.1$  Hz), 138.9, 137.3 (q,  $J = 2.1$  Hz), 130.8, 129.2, 129.1, 128.1, 128.1, 126.0 (q,  $J = 279.0$  Hz), 125.6, 124.2, 51.3 (q,  $J = 29.3$  Hz) ppm;  $^{19}\text{F NMR}$  (376 MHz,  $\text{CDCl}_3$ )  $\delta$  -67.73 (s, 3F) ppm; **HRMS** (ESI-TOF)  $m/z$ :  $[\text{M} - \text{H}]^-$  Calcd. for  $\text{C}_{14}\text{H}_7\text{F}_3\text{Cl}$ : 267.0914; found: 267.0919.

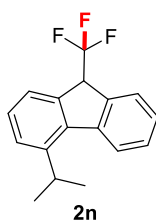

**4-isopropyl-9-(trifluoromethyl)-9H-fluorene (2n):** Flash column chromatography on a silica gel (petroleum ether-EtOAc = 100:1) gave **2n** (38.6 mg, 70% yield) as white solid;  $^1\text{H NMR}$  (400 MHz,  $\text{CDCl}_3$ )  $\delta$  8.01 (d,  $J = 7.9$  Hz, 1H), 7.77 (d,  $J = 7.5$  Hz, 1H), 7.60 (d,  $J = 8.3$  Hz, 1H), 7.52 (t,  $J = 7.6$  Hz, 1H), 7.47 (d,  $J = 7.7$  Hz, 1H), 7.42-7.35 (m, 2H), 4.60 (q,  $J = 9.4$  Hz, 1H), 3.94-3.76 (m, 1H), 1.45 (dd,  $J = 14.0, 6.8$  Hz, 6H) ppm;  $^{13}\text{C NMR}$  (101 MHz,  $\text{CDCl}_3$ )  $\delta$  144.7, 142.6, 139.0, 137.8 (p,  $J = 2.0$  Hz), 129.0, 127.6, 126.8, 126.4 (q,  $J = 279.0$  Hz), 125.9 (d,  $J = 1.7$  Hz), 125.6, 123.9, 123.3 (d,  $J = 1.8$  Hz), 51.0 (q,  $J = 28.8$  Hz), 29.5, 22.9, 22.6 ppm;  $^{19}\text{F NMR}$  (376 MHz,  $\text{CDCl}_3$ )  $\delta$  -67.70 (s, 3F) ppm; **HRMS** (ESI-TOF)  $m/z$ :  $[\text{M} - \text{H}]^-$  Calcd. for  $\text{C}_{17}\text{H}_{14}\text{F}_3$ : 275.1053; found: 275.1051.

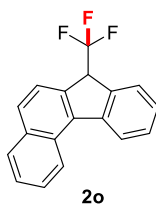

**7-(trifluoromethyl)-7H-benzo[c]fluorene (2o):** Flash column chromatography on a silica gel (petroleum ether-EtOAc = 100:1) gave **2o** (42.6 mg, 75% yield) as white solid;  $^1\text{H NMR}$  (400 MHz,  $\text{CDCl}_3$ )  $\delta$  8.78 (d,  $J = 8.5$  Hz, 1H), 8.42 (d,  $J = 7.9$  Hz, 1H), 8.01 (d,  $J = 8.1$  Hz, 1H), 7.91 (d,  $J = 8.4$  Hz, 1H), 7.88-7.82 (m, 2H), 7.74-7.68 (m, 1H), 7.62 (t,  $J = 7.5$  Hz, 2H), 7.49-7.42 (m, 1H), 4.67 (q,  $J = 9.3$  Hz, 1H) ppm;  $^{13}\text{C NMR}$  (101 MHz,  $\text{CDCl}_3$ )  $\delta$  143.3, 138.2, 137.6, 136.1, 134.5, 129.3, 129.3, 129.2, 128.7, 127.1, 126.8, 126.5 (q,  $J = 279.2$  Hz), 126.1, 125.8, 123.9, 123.3, 123.0, 51.5 (q,  $J = 28.9$  Hz) ppm;  $^{19}\text{F NMR}$  (376 MHz,  $\text{CDCl}_3$ )  $\delta$  -67.03 (s, 3F) ppm; **HRMS** (ESI-TOF)  $m/z$ :  $[\text{M} - \text{H}]^-$  Calcd. for  $\text{C}_{18}\text{H}_{10}\text{F}_3$ : 283.0740; found: 283.0745.

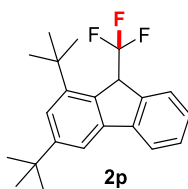

**1,3-di-tert-butyl-9-(trifluoromethyl)-9H-fluorene (2p):** Flash column chromatography on a silica gel (petroleum ether-EtOAc = 100:1) gave **2p** (58.1 mg, 84% yield) as white solid;  $^1\text{H NMR}$  (400 MHz,  $\text{CDCl}_3$ )  $\delta$  7.79 (d,  $J = 7.6$  Hz, 1H), 7.68 (d,  $J = 1.8$  Hz, 1H), 7.63 (d,  $J = 7.6$  Hz, 1H), 7.56 (d,  $J = 1.9$  Hz, 1H), 7.47 (t,  $J = 7.3$  Hz, 1H), 7.33 (t,  $J = 7.5$  Hz, 1H), 5.21 (q,  $J = 7.5$  Hz, 1H), 1.57 (s, 9H), 1.46 (s, 9H) ppm;  $^{13}\text{C NMR}$  (101 MHz,  $\text{CDCl}_3$ )  $\delta$  151.8, 148.9, 143.3, 142.3, 138.8 (d,  $J = 1.9$  Hz), 131.4 (q,  $J = 2.1$  Hz), 128.7, 126.9, 126.2 (q,  $J = 280.6$  Hz), 125.9, 125.4 (d,  $J = 1.6$  Hz), 119.6, 114.8, 52.2 (q,  $J = 27.2$  Hz), 37.7, 34.9, 32.4 (d,  $J = 1.9$  Hz), 31.4 ppm;  $^{19}\text{F NMR}$  (376 MHz,  $\text{CDCl}_3$ )  $\delta$  -65.43 (s, 3F) ppm; **HRMS** (ESI-TOF)  $m/z$ :  $[\text{M} - \text{H}]^-$  Calcd. for  $\text{C}_{22}\text{H}_{24}\text{F}_3$ : 345.1836; found: 345.1835.

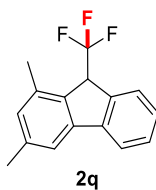

**1,3-dimethyl-9-(trifluoromethyl)-9H-fluorene (2q):** Flash column chromatography on a silica gel (petroleum ether-EtOAc = 100:1) gave **2q** (42.4 mg, 81% yield) as white solid;  $^1\text{H NMR}$  (400 MHz,  $\text{CDCl}_3$ )  $\delta$  7.76 (d,  $J = 7.6$  Hz, 1H), 7.71 (d,  $J = 7.5$  Hz, 1H), 7.65-7.44 (m, 2H), 7.45-7.32 (m, 1H), 7.05 (s, 1H), 4.61 (q,  $J = 8.2$  Hz, 1H), 2.51 (s, 3H), 2.48 (s, 3H) ppm;  $^{13}\text{C NMR}$  (101 MHz,  $\text{CDCl}_3$ )  $\delta$  143.0, 142.4, 139.1, 138.3 (d,  $J = 2.1$  Hz), 136.0, 133.2, 130.9, 129.0, 127.2, 126.8 (q,  $J = 280.0$  Hz), 126.2, 120.0, 118.5, 50.7 (q,  $J = 29.0$  Hz), 21.4, 20.0 (q,  $J = 4.0$  Hz) ppm;  $^{19}\text{F NMR}$  (376 MHz,  $\text{CDCl}_3$ )  $\delta$  -67.50 (d,  $J = 3.6$  Hz, 3F) ppm; **HRMS** (ESI-TOF)  $m/z$ :  $[\text{M} - \text{H}]^-$  Calcd. for  $\text{C}_{16}\text{H}_{12}\text{F}_3$ : 261.0897; found: 261.0893.

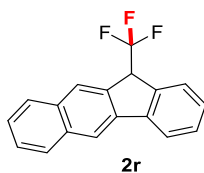

**11-(trifluoromethyl)-11H-benzo[b]fluorene (2r):** Flash column chromatography on a silica gel (petroleum ether-EtOAc = 100:1) gave **2r** (48.8 mg, 86% yield) as white solid;  $^1\text{H NMR}$  (400 MHz,  $\text{CDCl}_3$ )  $\delta$  8.19 (d,  $J = 8.5$  Hz, 1H), 8.00 (d,  $J = 8.4$  Hz, 1H), 7.97-7.88 (m, 2H), 7.83 (d,  $J = 7.6$  Hz, 1H), 7.78 (d,  $J = 7.6$  Hz, 1H), 7.67-7.58 (m, 1H), 7.57-7.49 (m, 2H), 7.46-7.37 (m, 1H), 5.04 (q,  $J = 8.1$  Hz, 1H) ppm;  $^{13}\text{C NMR}$  (101 MHz,  $\text{CDCl}_3$ )  $\delta$  142.8, 141.2, 138.5, 133.7, 133.4 (q,  $J = 1.7$  Hz), 130.9, 130.7, 129.1, 129.1, 127.2, 127.0, 126.3 (q,  $J = 281.5$  Hz), 126.1 (d,  $J = 1.9$  Hz), 125.6, 125.1 (q,  $J = 4.2$  Hz), 120.0, 118.4, 51.2 (q,  $J = 29.2$  Hz) ppm;  $^{19}\text{F NMR}$  (376 MHz,  $\text{CDCl}_3$ )  $\delta$  -65.66 (s, 3F) ppm; **HRMS** (ESI-TOF)  $m/z$ : [M - H]<sup>-</sup> Calcd. for  $\text{C}_{18}\text{H}_{10}\text{F}_3$ : 283.0740; found: 283.0747.

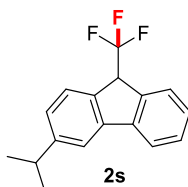

**3-isopropyl-9-(trifluoromethyl)-9H-fluorene (2s):** Flash column chromatography on a silica gel (petroleum ether-EtOAc = 100:1) gave **2s** (45.2 mg, 82% yield) as white solid;  $^1\text{H NMR}$  (400 MHz,  $\text{CDCl}_3$ )  $\delta$  7.83 (d,  $J = 7.6$  Hz, 1H), 7.73 (d,  $J = 7.6$  Hz, 1H), 7.70-7.63 (m, 2H), 7.51 (t,  $J = 7.5$  Hz, 1H), 7.39 (t,  $J = 8.1$  Hz, 1H), 7.29 (dd,  $J = 7.9, 1.6$  Hz, 1H), 4.59 (q,  $J = 9.5$  Hz, 1H), 3.31-2.94 (m, 1H), 1.39 (d,  $J = 6.9$  Hz, 6H) ppm;  $^{13}\text{C NMR}$  (101 MHz,  $\text{CDCl}_3$ )  $\delta$  150.2, 142.4, 142.3, 137.7 (q,  $J = 2.2$  Hz), 134.9 (q,  $J = 2.2$  Hz), 129.0, 127.4, 126.5 (q,  $J = 278.7$  Hz), 126.1, 125.9, 125.7, 120.1, 118.1, 51.0 (q,  $J = 29.2$  Hz), 34.3, 24.1 ppm;  $^{19}\text{F NMR}$  (376 MHz,  $\text{CDCl}_3$ )  $\delta$  -67.81 (s, 3F) ppm; **HRMS** (ESI-TOF)  $m/z$ : [M - H]<sup>-</sup> Calcd. for  $\text{C}_{17}\text{H}_{14}\text{F}_3$ : 275.1053; found: 275.1058.

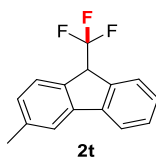

**3-methyl-9-(trifluoromethyl)-9H-fluorene (2t):** Flash column chromatography on a silica gel (petroleum ether-EtOAc = 100:1) gave **2t** (43.1 mg, 87% yield) as white solid;  $^1\text{H NMR}$  (400 MHz,  $\text{CDCl}_3$ )  $\delta$  7.78 (d,  $J = 7.6$  Hz, 1H), 7.71 (d,  $J = 7.6$  Hz, 1H), 7.61 (d,  $J = 9.6$  Hz, 2H), 7.50 (t,  $J = 7.5$  Hz, 1H), 7.38 (t,  $J = 7.5$  Hz, 1H), 7.21 (d,  $J = 7.7$  Hz, 1H), 4.58 (q,  $J = 9.4$  Hz, 1H), 2.50 (s, 3H) ppm;  $^{13}\text{C NMR}$  (101 MHz,  $\text{CDCl}_3$ )  $\delta$  142.3 (d,  $J = 3.9$  Hz), 139.0, 137.7 (q,  $J = 2.3$  Hz), 134.5 (q,  $J = 2.3$  Hz), 129.0, 128.5, 127.5, 126.4 (q,  $J = 278.7$  Hz), 125.9 (d,  $J = 1.5$  Hz), 125.6, 120.8, 120.1, 117.8, 51.0 (q,  $J = 29.3$  Hz), 21.6 ppm;  $^{19}\text{F NMR}$  (376 MHz,  $\text{CDCl}_3$ )  $\delta$  -67.94 (s, 3F) ppm; **HRMS** (ESI-TOF)  $m/z$ : [M - H]<sup>-</sup> Calcd. for  $\text{C}_{15}\text{H}_{10}\text{F}_3$ : 247.0740; found: 247.0746.

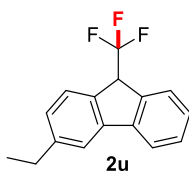

**3-ethyl-9-(trifluoromethyl)-9H-fluorene (2u):** Flash column chromatography on a silica gel (petroleum ether-EtOAc = 100:1) gave **2u** (46.1 mg, 88% yield) as white solid;  $^1\text{H NMR}$  (400 MHz,  $\text{CDCl}_3$ )  $\delta$  7.81 (d,  $J = 7.6$  Hz, 1H), 7.73 (d,  $J = 7.6$  Hz, 1H), 7.64 (d,  $J = 8.8$  Hz, 2H), 7.50 (t,  $J = 7.5$  Hz, 1H), 7.39 (t,  $J = 7.5$  Hz, 1H), 7.25 (d,  $J = 7.5$  Hz, 1H), 4.59 (q,  $J = 9.5$  Hz, 1H), 2.81 (q,  $J = 7.6$  Hz, 2H), 1.37 (t,  $J = 7.6$  Hz, 3H) ppm;  $^{13}\text{C NMR}$  (101 MHz,  $\text{CDCl}_3$ )  $\delta$  145.5, 142.3, 137.7 (q,  $J = 2.1$  Hz), 134.7 (q,  $J = 2.1$  Hz), 129.0, 127.5 (d,  $J = 2.5$  Hz), 126.4 (q,  $J = 278.7$  Hz), 125.9 (d,  $J = 0.9$  Hz), 125.68 (d,  $J = 0.9$  Hz), 120.1, 119.6, 51.0 (q,  $J = 29.2$  Hz), 29.0, 15.7 ppm;  $^{19}\text{F NMR}$  (376 MHz,  $\text{CDCl}_3$ )  $\delta$  -67.86 (s, 3F) ppm; **HRMS** (ESI-TOF)  $m/z$ : [M - H] $^-$  Calcd. for  $\text{C}_{16}\text{H}_{12}\text{F}_3$ : 261.0897; found: 261.0899.

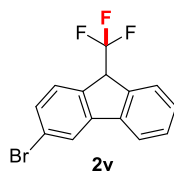

**3-bromo-9-(trifluoromethyl)-9H-fluorene (2v):** Flash column chromatography on a silica gel (petroleum ether-EtOAc = 100:1) gave **2v** (21.7 mg, 35% yield) as white solid;  $^1\text{H NMR}$  (400 MHz,  $\text{CDCl}_3$ )  $\delta$  7.93 (d,  $J = 1.6$  Hz, 1H), 7.74 (dd,  $J = 17.5, 7.6$  Hz, 2H), 7.64-7.48 (m, 3H), 7.42 (t,  $J = 7.5$  Hz, 1H), 4.57 (q,  $J = 9.3$  Hz, 1H) ppm;  $^{13}\text{C NMR}$  (101 MHz,  $\text{CDCl}_3$ )  $\delta$  144.3, 140.9, 137.6 (d,  $J = 2.0$  Hz), 136.0, 130.8, 129.3, 128.4, 127.3, 127.1 (q,  $J = 275.7$  Hz), 126.0, 123.6, 123.5, 120.5, 51.0 (q,  $J = 29.6$  Hz) ppm;  $^{19}\text{F NMR}$  (376 MHz,  $\text{CDCl}_3$ )  $\delta$  -67.83 (s, 3F) ppm; **HRMS** (ESI-TOF)  $m/z$ : [M - H] $^-$  Calcd. for  $\text{C}_{14}\text{H}_7\text{F}_3\text{Br}$ : 310.9689; found: 310.9694.

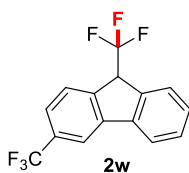

**3,9-bis(trifluoromethyl)-9H-fluorene (2w):** Flash column chromatography on a silica gel (petroleum ether-EtOAc = 100:1) gave **2w** (40.4 mg, 67% yield) as white solid;  $^1\text{H NMR}$  (400 MHz,  $\text{CDCl}_3$ )  $\delta$  8.03 (d,  $J = 1.7$  Hz, 1H), 7.84 (t,  $J = 8.0$  Hz, 2H), 7.75 (d,  $J = 7.6$  Hz, 1H), 7.66 (d,  $J = 7.9$  Hz, 1H), 7.55 (t,  $J = 7.5$  Hz, 1H), 7.46 (t,  $J = 7.5$  Hz, 1H), 4.68 (q,  $J = 9.3$  Hz, 1H) ppm;  $^{13}\text{C NMR}$  (101 MHz,  $\text{CDCl}_3$ )  $\delta$  143.0, 140.8, 137.4 (q,  $J = 2.1$  Hz), 131.7 (q,  $J = 32.4$  Hz), 130.1, 129.4, 128.6, 127.3, 126.3, 126.0, 124.4 (q,  $J = 3.7$  Hz), 122.8 (q,  $J = 272.4$  Hz), 120.7, 117.1 (q,  $J = 3.8$  Hz), 51.4 (q,  $J = 29.7$  Hz) ppm;  $^{19}\text{F NMR}$  (376 MHz,  $\text{CDCl}_3$ )  $\delta$  -62.45 (s, 3F), -67.60 (s, 3F) ppm; **HRMS** (ESI-TOF)  $m/z$ : [M - H] $^-$  Calcd. for  $\text{C}_{15}\text{H}_7\text{F}_6$ : 301.0457; found: 301.0451.



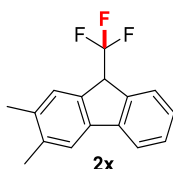

**2,3-dimethyl-9-(trifluoromethyl)-9H-fluorene (2x)**: Flash column chromatography on a silica gel (petroleum ether-EtOAc = 100:1) gave **2x** (42.9 mg, 82% yield) as white solid;  $^1\text{H NMR}$  (400 MHz,  $\text{CDCl}_3$ )  $\delta$  7.75 (d,  $J = 7.6$  Hz, 1H), 7.71 (d,  $J = 7.5$  Hz, 1H), 7.58 (s, 1H), 7.53-7.45 (m, 2H), 7.36 (t,  $J = 7.5$  Hz, 1H), 4.56 (q,  $J = 9.5$  Hz, 1H), 2.40 (d,  $J = 5.6$  Hz, 6H) ppm;  $^{13}\text{C NMR}$  (101 MHz,  $\text{CDCl}_3$ )  $\delta$  142.5, 140.0, 137.6, 137.4 (q,  $J = 2.2$  Hz), 136.4, 135.0 (q,  $J = 2.3$  Hz), 128.9, 127.0, 126.9, 126.5 (q,  $J = 278.6$  Hz), 125.8 (d,  $J = 1.5$  Hz), 121.3, 119.8, 51.0 (q,  $J = 29.2$  Hz), 20.2, 20.1 ppm;  $^{19}\text{F NMR}$  (376 MHz,  $\text{CDCl}_3$ )  $\delta$  -67.87 (s, 3F) ppm; **HRMS** (ESI-TOF)  $m/z$ :  $[\text{M} - \text{H}]^-$  Calcd. for  $\text{C}_{16}\text{H}_{12}\text{F}_3$ : 261.0897; found: 261.0899.

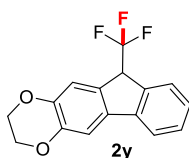

**10-(trifluoromethyl)-2,3-dihydro-10H-fluoreno[2,3-b][1,4]dioxine (2y)**: Flash column chromatography on a silica gel (petroleum ether-EtOAc = 50:1) gave **2y** (39.7 mg, 68% yield) as white solid;  $^1\text{H NMR}$  (400 MHz,  $\text{CDCl}_3$ )  $\delta$  7.78-7.58 (m, 2H), 7.45 (t,  $J = 7.6$  Hz, 1H), 7.39-7.28 (m, 1H), 7.27 (s, 1H), 7.22 (s, 1H), 4.51 (q,  $J = 9.4$  Hz, 1H), 4.33 (s, 4H) ppm;  $^{13}\text{C NMR}$  (101 MHz,  $\text{CDCl}_3$ )  $\delta$  144.6, 143.5, 142.1, 137.4 (q,  $J = 2.3$  Hz), 135.7, 130.3 (q,  $J = 2.2$  Hz), 129.0, 126.7, 126.3 (q,  $J = 278.7$  Hz), 125.7, 119.5, 115.0, 108.9, 64.4, 64.4, 50.8 (q,  $J = 29.3$  Hz) ppm;  $^{19}\text{F NMR}$  (376 MHz,  $\text{CDCl}_3$ )  $\delta$  -68.23 (s, 3F) ppm; **HRMS** (ESI-TOF)  $m/z$ :  $[\text{M} - \text{H}]^-$  Calcd. for  $\text{C}_{16}\text{H}_{10}\text{F}_3\text{O}_2$ : 291.0638; found: 291.0633.

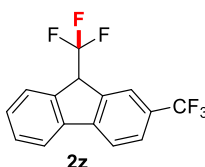

**2,9-bis(trifluoromethyl)-9H-fluorene (2z)**: Flash column chromatography on a silica gel (petroleum ether-EtOAc = 50:1) gave **2z** (38.6 mg, 64% yield) as white solid;  $^1\text{H NMR}$  (400 MHz,  $\text{CDCl}_3$ )  $\delta$  7.97 (s, 1H), 7.87 (dd,  $J = 12.1, 7.8$  Hz, 3H), 7.77 (dd,  $J = 8.0, 3.1$  Hz, 3H), 7.56 (t,  $J = 7.5$  Hz, 1H), 7.50 - 7.45 (m, 2H), 4.67 (q,  $J = 9.3$  Hz, 1H) ppm;  $^{13}\text{C NMR}$  (101 MHz,  $\text{CDCl}_3$ )  $\delta$  145.6, 140.7, 137.8 (d,  $J = 2.1$  Hz), 137.7 (q,  $J = 2.2$  Hz), 129.7 (q,  $J = 32.4$  Hz), 129.4, 128.9, 126.5 (q,  $J = 3.9$  Hz), 126.1 (d,  $J = 1.5$  Hz), 125.9 (d,  $J = 278.9$  Hz), 125.5, 122.9 (q,  $J = 5.1$  Hz), 121.0, 120.4, 51.3 (q,  $J = 29.7$  Hz) ppm;  $^{19}\text{F NMR}$  (376 MHz,  $\text{CDCl}_3$ )  $\delta$  -61.98 (s, 3F), -67.67 (d,  $J = 9.4$  Hz, 3F) ppm; **HRMS** (ESI-TOF)  $m/z$ :  $[\text{M} - \text{H}]^-$  Calcd. for  $\text{C}_{15}\text{H}_7\text{F}_6$ : 301.0457; found: 301.0452.

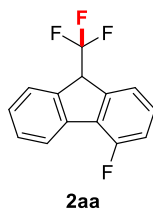

**4-fluoro-9-(trifluoromethyl)-9H-fluorene (2aa):** Flash column chromatography on a silica gel (petroleum ether-EtOAc = 50:1) gave **2aa** (39.3 mg, 78% yield) as white solid.  $^1\text{H NMR}$  (400 MHz,  $\text{CDCl}_3$ )  $\delta$  8.01 (d,  $J = 7.6$  Hz, 1H), 7.72 (d,  $J = 7.5$  Hz, 1H), 7.57-7.48 (m, 2H), 7.42 (td,  $J = 7.6, 1.2$  Hz, 1H), 7.35 (td,  $J = 7.9, 5.1$  Hz, 1H), 7.24-7.16 (m, 1H), 4.67 (q,  $J = 9.3$  Hz, 1H) ppm;  $^{13}\text{C NMR}$  (101 MHz,  $\text{CDCl}_3$ )  $\delta$  159.5, 157.0, 139.8 (dd,  $J = 6.1, 2.2$  Hz), 139.3 (d,  $J = 3.1$  Hz), 136.6 (q,  $J = 2.3$  Hz), 129.4, 128.9 (d,  $J = 7.2$  Hz), 127.8, 126.0 (q,  $J = 278.8$  Hz), 125.7, 123.8 (d,  $J = 6.1$  Hz), 121.7 (dd,  $J = 3.3, 1.4$  Hz), 116.3 (d,  $J = 19.7$  Hz), 51.7 (q,  $J = 29.5, 28.8$  Hz) ppm;  $^{19}\text{F NMR}$  (376 MHz,  $\text{CDCl}_3$ )  $\delta$  -67.81 (d,  $J = 9.3$  Hz, 1F), -119.53 (dd,  $J = 9.8, 5.0$  Hz, 3F) ppm; **HRMS** (ESI-TOF)  $m/z$ :  $[\text{M} - \text{H}]^-$  Calcd. for  $\text{C}_{14}\text{H}_7\text{F}_4$ : 251.0489; found: 251.0482.

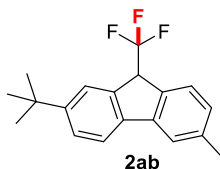

**2-(tert-butyl)-6-methyl-9-(trifluoromethyl)-9H-fluorene (2ab):** Flash column chromatography on a silica gel (petroleum ether-EtOAc = 100:1) gave **2ab** (49.8 mg, 82% yield) as white solid;  $^1\text{H NMR}$  (400 MHz,  $\text{CDCl}_3$ )  $\delta$  7.73 (d,  $J = 2.0$  Hz, 1H), 7.69-7.63 (m, 2H), 7.56-7.50 (m, 2H), 7.29 (d,  $J = 7.4$  Hz, 1H), 4.55 (q,  $J = 9.6$  Hz, 1H), 2.47 (s, 3H), 1.42 (s, 9H) ppm;  $^{13}\text{C NMR}$  (101 MHz,  $\text{CDCl}_3$ )  $\delta$  150.6, 139.6, 139.5, 137.6 (d,  $J = 2.5$  Hz), 137.2 (d,  $J = 2.2$  Hz), 137.1, 129.8, 126.5, 126.5 (q,  $J = 278.6$  Hz), 126.1, 122.8 (d,  $J = 1.5$  Hz), 119.7, 119.3, 51.1 (q,  $J = 29.0$  Hz), 35.0, 31.5, 21.6 ppm;  $^{19}\text{F NMR}$  (376 MHz,  $\text{CDCl}_3$ )  $\delta$  -67.69 (s, 3F) ppm; **HRMS** (ESI-TOF)  $m/z$ :  $[\text{M} - \text{H}]^-$  Calcd. for  $\text{C}_{19}\text{H}_{18}\text{F}_3$ : 303.1366; found: 303.1369.

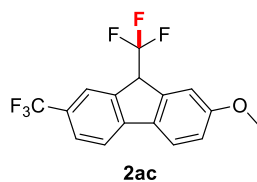

**2-methoxy-7,9-bis(trifluoromethyl)-9H-fluorene (2ac):** Flash column chromatography on a silica gel (petroleum ether-EtOAc = 50:1) gave **2ac** (35.2 mg, 53% yield) as white solid.  $^1\text{H NMR}$  (400 MHz,  $\text{CDCl}_3$ )  $\delta$  7.97 (s, 1H), 7.87 (dd,  $J = 12.1, 7.8$  Hz, 2H), 7.77 (dd,  $J = 8.0, 3.1$  Hz, 2H), 7.56 (t,  $J = 7.5$  Hz, 1H), 7.50-7.45 (m, 1H), 4.67 (q,  $J = 9.3$  Hz, 1H) ppm;  $^{13}\text{C NMR}$  (101 MHz,  $\text{CDCl}_3$ )  $\delta$  160.6, 145.6, 139.7 (q,  $J = 2.0$  Hz), 137.1 (q,  $J = 2.1$  Hz), 133.5, 128.6 (q,  $J = 141.5$  Hz), 126.6 (q,  $J = 278.7$  Hz), 126.5 (q,  $J = 3.8$  Hz), 122.8, 121.9, 119.5, 115.5, 111.7, 55.7, 51.2 (q,  $J = 29.7$  Hz) ppm;  $^{19}\text{F NMR}$  (376 MHz,  $\text{CDCl}_3$ )  $\delta$  -61.85 (s, 3F), -67.75 (d,  $J = 9.3$  Hz, 3F) ppm; **HRMS** (ESI-TOF)  $m/z$ :  $[\text{M} - \text{H}]^-$  Calcd. for  $\text{C}_{16}\text{H}_9\text{F}_6\text{O}$ : 331.0563; found: 331.0561.

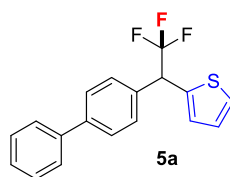

**2-(1-([1,1'-biphenyl]-4-yl)-2,2,2-trifluoroethyl)thiophene (5a):** Flash column chromatography on a silica gel (petroleum ether-EtOAc = 50:1) gave **5a** (47.0 mg, 74% yield) as white solid;  $^1\text{H NMR}$  (400 MHz,  $\text{CDCl}_3$ )  $\delta$  7.64 (t,  $J = 7.2$  Hz, 4H), 7.59-7.45 (m, 4H), 7.43-7.31 (m, 2H), 7.23- 7.01 (m, 2H), 5.00 (q,  $J = 9.3$  Hz, 0.8H, Major isomer), 4.86 (q,  $J = 9.5$  Hz, 0.2H, Minor isomer) ppm;  $^{13}\text{C NMR}$  (101 MHz,  $\text{CDCl}_3$ )  $\delta$  141.4, 140.4, 137.1, 133.8, 129.5, 128.9, 127.6, 127.6, 127.5, 127.2, 127.0, 125.9, 123.9, 51.0 (q,  $J = 29.2$  Hz) ppm;  $^{19}\text{F NMR}$  (376 MHz,  $\text{CDCl}_3$ )  $\delta$  -67.51 (s, 3F) ppm; **HRMS** (ESI-TOF)  $m/z$ :  $[\text{M} - \text{H}]^-$  Calcd. for  $\text{C}_{18}\text{H}_{12}\text{F}_3\text{S}$ : 317.0617; found: 317.0612.

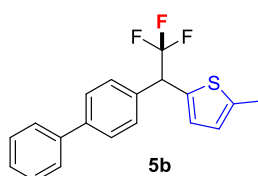

**2-(1-([1,1'-biphenyl]-4-yl)-2,2,2-trifluoroethyl)-5-methylthiophene (5b):** Flash column chromatography on a silica gel (petroleum ether-EtOAc = 50:1) gave **5b** (47.0 mg, 74% yield) as white solid;  $^1\text{H NMR}$  (400 MHz,  $\text{CDCl}_3$ )  $\delta$  7.76-7.33 (m, 9H), 6.93 (s, 1H), 6.69 (s, 1H), 4.89 (q,  $J = 9.5$  Hz, 0.88H, Major isomer), 4.80 (d,  $J = 9.8$  Hz, 0.12H, Minor isomer), 2.49 (s, 3H) ppm;  $^{13}\text{C NMR}$  (101 MHz,  $\text{CDCl}_3$ )  $\delta$  141.3, 140.6, 140.4, 134.5, 134.0, 129.4, 128.9, 127.6, 127.5, 127.5, 127.2, 125.1, 123.1 (d,  $J = 224.8$  Hz), 51.1 (q,  $J = 29.0$  Hz), 15.2 ppm;  $^{19}\text{F NMR}$  (376 MHz,  $\text{CDCl}_3$ )  $\delta$  -67.88 (s, 3F) ppm; **HRMS** (ESI-TOF)  $m/z$ :  $[\text{M} - \text{H}]^-$  Calcd. for  $\text{C}_{19}\text{H}_{14}\text{F}_3\text{S}$ : 331.0774; found: 331.0778.

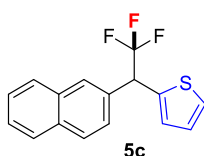

**2-(2,2,2-trifluoro-1-(naphthalen-2-yl)ethyl)thiophene (5c):** Flash column chromatography on a silica gel (petroleum ether-EtOAc = 50:1) gave **5c** (32.1 mg, 55% yield) as white solid;  $^1\text{H NMR}$  (400 MHz,  $\text{CDCl}_3$ )  $\delta$  8.05-7.80 (m, 4H), 7.69-7.45 (m, 3H), 7.40-7.02 (m, 3H), 5.12 (q,  $J = 9.3$  Hz, 0.8H, Major isomer), 4.98 (q,  $J = 9.6$  Hz, 0.2H, Minor isomer) ppm;  $^{13}\text{C NMR}$  (101 MHz,  $\text{CDCl}_3$ )  $\delta$  137.2, 133.3, 133.1, 132.3, 128.7, 128.5, 128.2, 127.7, 127.6, 127.0, 126.7, 126.6, 126.4, 126.0, 51.4 (q,  $J = 29.2$  Hz) ppm;  $^{19}\text{F NMR}$  (376 MHz,  $\text{CDCl}_3$ )  $\delta$  -67.51 (s, 3F) ppm; **HRMS** (ESI-TOF)  $m/z$ :  $[\text{M} - \text{H}]^-$  Calcd. for  $\text{C}_{16}\text{H}_{10}\text{F}_3\text{S}$ : 291.0461; found: 291.0465.

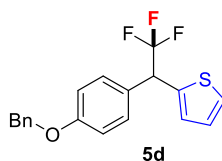

**2-(1-(4-(benzyloxy)phenyl)-2,2,2-trifluoroethyl)thiophene (5d):** Flash column chromatography on a silica gel (petroleum ether-EtOAc = 30:1) gave **5d** (54.2 mg, 78% yield) as white solid;  $^1\text{H NMR}$  (400

MHz, CDCl<sub>3</sub>) δ 7.62-6.93 (m, 11H), 5.10 (s, 2H), 4.89 (q, *J* = 9.3 Hz, 0.87H, Major isomer), 4.75 (q, *J* = 9.6 Hz, 0.13H, Minor isomer) ppm; <sup>13</sup>C NMR (101 MHz, CDCl<sub>3</sub>) δ 158.9, 137.6, 136.8, 130.3, 128.7, 128.1, 127.6, 127.3, 126.9, 125.7, 124.3, 122.6 (d, *J* = 213.8 Hz), 115.1, 70.1, 50.5 (q, *J* = 29.1 Hz) ppm; <sup>19</sup>F NMR (376 MHz, CDCl<sub>3</sub>) δ -67.55 (s, 3F) ppm; HRMS (ESI-TOF) *m/z*: [M - H]<sup>-</sup> Calcd. for C<sub>19</sub>H<sub>14</sub>F<sub>3</sub>SO: 347.0723; found: 347.0727.

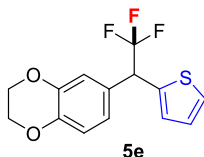

**6-(2,2,2-trifluoro-1-(thiophen-2-yl)ethyl)-2,3-dihydrobenzo[b][1,4]dioxine (5e)**: Flash column chromatography on a silica gel (petroleum ether-EtOAc = 30:1) gave **5e** (31.2 mg, 52% yield) as white solid; <sup>1</sup>H NMR (400 MHz, CDCl<sub>3</sub>) δ 7.40-7.22 (m, 1H), 7.15-6.82 (m, 5H), 4.82 (q, *J* = 9.3 Hz, 0.85H, Major isomer), 4.68 (q, *J* = 9.7 Hz, 0.15H, Minor isomer), 4.28 (s, 4H) ppm; <sup>13</sup>C NMR (101 MHz, CDCl<sub>3</sub>) δ 143.8, 143.6, 137.4, 127.9, 127.3, 126.9, 125.7, 123.6 (d), 122.2 (d, *J* = 16.3 Hz), 118.0, 117.5, 64.4, 64.3, 50.5 (q, *J* = 29.2 Hz) ppm; <sup>19</sup>F NMR (376 MHz, CDCl<sub>3</sub>) δ -67.86 (s, 3F) ppm; HRMS (ESI-TOF) *m/z*: [M - H]<sup>-</sup> Calcd. for C<sub>14</sub>H<sub>10</sub>F<sub>3</sub>SO<sub>2</sub>: 299.0359; found: 299.0364.

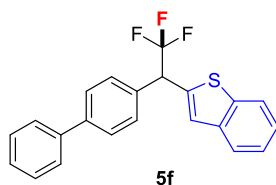

**2-(1-([1,1'-biphenyl]-4-yl)-2,2,2-trifluoroethyl)benzo[b]thiophene (5f)**: Flash column chromatography on a silica gel (petroleum ether-EtOAc = 50:1) gave **5f** (49.3 mg, 60% yield) as white solid; <sup>1</sup>H NMR (400 MHz, CDCl<sub>3</sub>) δ 8.14-7.34 (m, 14H), 5.15 (q, *J* = 9.3 Hz, 0.7H, Major isomer), 5.05 (q, *J* = 9.3 Hz, 0.2H, Minor isomer) ppm; <sup>13</sup>C NMR (101 MHz, CDCl<sub>3</sub>) δ 141.4, 140.4, 140.0, 138.1, 132.8, 129.8, 129.6, 128.8, 127.6, 127.5, 127.1, 124.7, 124.4, 123.8, 122.9, 121.7, 49.6 (q, *J* = 28.6 Hz) ppm; <sup>19</sup>F NMR (376 MHz, CDCl<sub>3</sub>) δ -66.60 (s, 3F) ppm; HRMS (ESI-TOF) *m/z*: [M - H]<sup>-</sup> Calcd. for C<sub>22</sub>H<sub>14</sub>F<sub>3</sub>S: 367.0774; found: 367.0778.

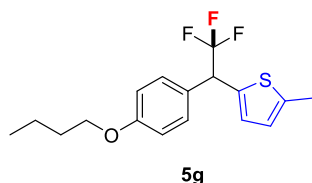

**2-(1-(4-butoxyphenyl)-2,2,2-trifluoroethyl)-5-methylthiophene (5g)**: Flash column chromatography on a silica gel (petroleum ether-EtOAc = 30:1) gave **5g** (37.6 mg, 60% yield) as white solid <sup>1</sup>H NMR (400 MHz, CDCl<sub>3</sub>) δ 7.37 (d, *J* = 8.2 Hz, 2H), 7.11-6.79 (m, 3H), 6.67 (d, *J* = 3.6 Hz, 1H), 4.79 (q, *J* = 9.7 Hz, 1H), 4.00 (t, *J* = 6.3 Hz, 2H), 2.47 (s, 3H), 1.93-1.70 (m, 2H), 1.54 (q, *J* = 7.4 Hz, 2H), 1.02 (t, *J* = 7.3 Hz, 3H) ppm; <sup>13</sup>C NMR (101 MHz, CDCl<sub>3</sub>) δ 159.2, 140.3, 135.2, 130.1, 127.1, 126.9, 125.0, 124.4, 114.7, 67.7, 50.6 (q, *J* = 29.1 Hz), 31.3, 19.3, 15.2, 13.9 ppm; <sup>19</sup>F NMR (376 MHz, CDCl<sub>3</sub>) δ -67.93 (s, 3F) ppm; HRMS (ESI-TOF) *m/z*: [M - H]<sup>-</sup> Calcd. for C<sub>17</sub>H<sub>18</sub>F<sub>3</sub>SO: 327.1036; found: 327.1038.

## VIII.X-Ray data for 2q and 2x

X-ray for 2q

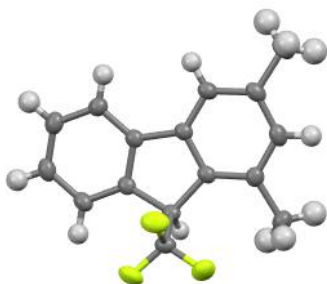

Fig S5. X-ray structure of 2q

|                                    |                                                               |
|------------------------------------|---------------------------------------------------------------|
| Identification code                | A                                                             |
| Empirical formula                  | C <sub>16</sub> H <sub>13</sub> F <sub>3</sub>                |
| Formula weight                     | 262.26                                                        |
| Temperature/K                      | 193.00                                                        |
| Crystal system                     | monoclinic                                                    |
| Space group                        | P21/c                                                         |
| a/Å                                | 12.8122(6)                                                    |
| b/Å                                | 4.8770(2)                                                     |
| c/Å                                | 20.0701(9)                                                    |
| α/°                                | 90                                                            |
| β/°                                | 98.304(2)                                                     |
| γ/°                                | 90                                                            |
| Volume/Å <sup>3</sup>              | 1240.93(10)                                                   |
| Z                                  | 4                                                             |
| ρ <sub>calc</sub> /cm <sup>3</sup> | 1.404                                                         |
| μ/mm <sup>-1</sup>                 | 0.604                                                         |
| F(000)                             | 544.0                                                         |
| Crystal size/mm <sup>3</sup>       | 0.13 × 0.12 × 0.1                                             |
| Radiation                          | GaKα (λ = 1.34139)                                            |
| 2θ range for data collection/°     | 6.066 to 120.762                                              |
| Index ranges                       | -16 ≤ h ≤ 14, -6 ≤ k ≤ 6, -23 ≤ l ≤ 25                        |
| Reflections collected              | 7925                                                          |
| Independent reflections            | 2603 [R <sub>int</sub> = 0.0400, R <sub>sigma</sub> = 0.0394] |
| Data/restraints/parameters         | 2603/0/174                                                    |
| Goodness-of-fit on F <sup>2</sup>  | 1.100                                                         |
| Final R indexes [I ≥ 2σ (I)]       | R <sub>1</sub> = 0.0578, wR <sub>2</sub> = 0.1846             |
| Final R indexes [all data]         | R <sub>1</sub> = 0.0647, wR <sub>2</sub> = 0.1934             |

Largest diff. peak/hole / e Å<sup>-3</sup> 0.35/-0.34

X-ray for **2x**

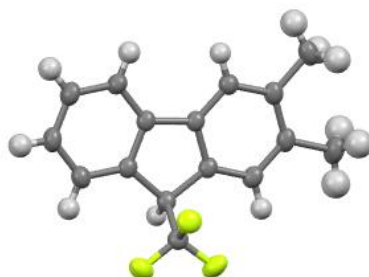

Fig S6. X-ray structure of **2x**

|                                             |                                                               |
|---------------------------------------------|---------------------------------------------------------------|
| Identification code                         | A                                                             |
| Empirical formula                           | C <sub>16</sub> H <sub>13</sub> F <sub>3</sub>                |
| Formula weight                              | 262.26                                                        |
| Temperature/K                               | 193.00                                                        |
| Crystal system                              | triclinic                                                     |
| Space group                                 | P-1                                                           |
| a/Å                                         | 4.8272(4)                                                     |
| b/Å                                         | 9.3359(8)                                                     |
| c/Å                                         | 14.3768(13)                                                   |
| α/°                                         | 87.031(4)                                                     |
| β/°                                         | 80.964(4)                                                     |
| γ/°                                         | 77.047(3)                                                     |
| Volume/Å <sup>3</sup>                       | 623.49(9)                                                     |
| Z                                           | 2                                                             |
| ρ <sub>calc</sub> /cm <sup>3</sup>          | 1.397                                                         |
| μ/mm <sup>-1</sup>                          | 0.601                                                         |
| F(000)                                      | 272.0                                                         |
| Crystal size/mm <sup>3</sup>                | 0.13 × 0.12 × 0.1                                             |
| Radiation                                   | GaKα (λ = 1.34139)                                            |
| 2θ range for data collection/°              | 9.968 to 120.3                                                |
| Index ranges                                | -6 ≤ h ≤ 6, -11 ≤ k ≤ 12, -18 ≤ l ≤ 18                        |
| Reflections collected                       | 6808                                                          |
| Independent reflections                     | 2690 [R <sub>int</sub> = 0.0497, R <sub>sigma</sub> = 0.0551] |
| Data/restraints/parameters                  | 2690/0/175                                                    |
| Goodness-of-fit on F <sup>2</sup>           | 1.088                                                         |
| Final R indexes [I ≥ 2σ (I)]                | R <sub>1</sub> = 0.0715, wR <sub>2</sub> = 0.2043             |
| Final R indexes [all data]                  | R <sub>1</sub> = 0.0776, wR <sub>2</sub> = 0.2135             |
| Largest diff. peak/hole / e Å <sup>-3</sup> | 0.41/-0.46                                                    |

## IX. References

1. H. Guo, S. Zhang, X.-J. Feng, X. Yu, Y. Yamamoto, and M. Bao, *Org. Lett.* 2022, **24**, 2596.
2. H.-J. Tang, L.-Z. Lin, C. Feng, and T.-P. Loh, *Angew. Chem. Int. Ed.* 2017, **56**, 9872.

## X. NMR spectra

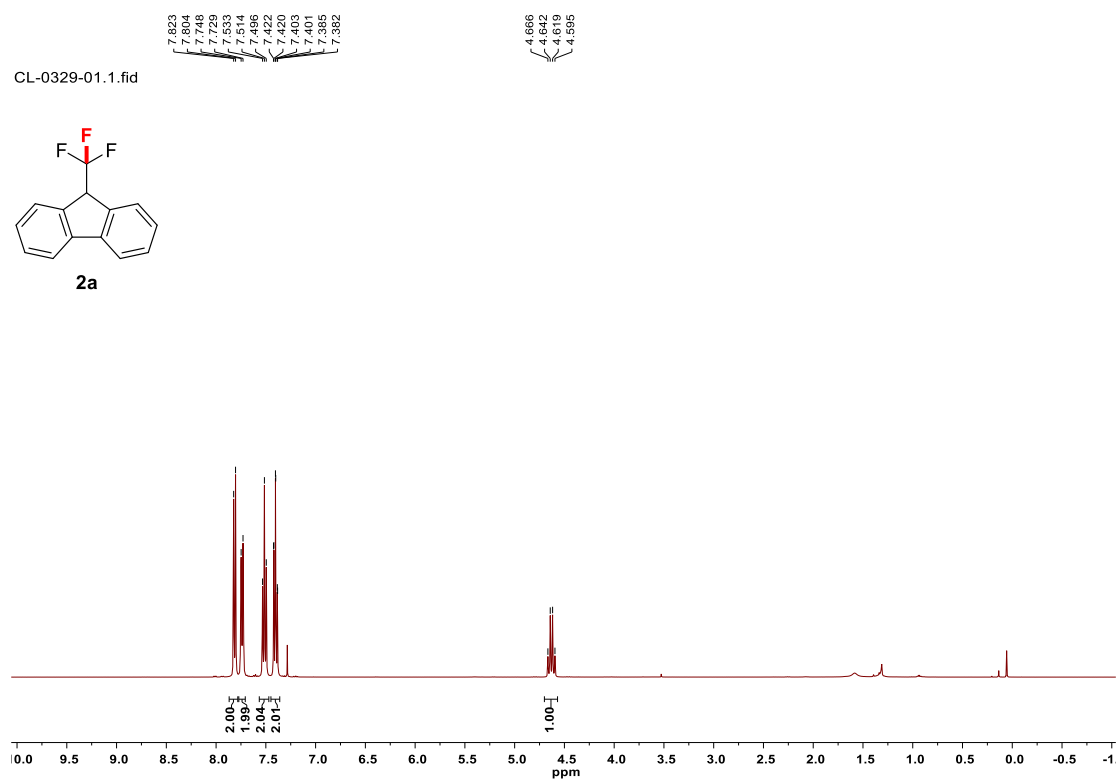

<sup>1</sup>H NMR spectrum of **2a** (400 MHz, CDCl<sub>3</sub>)

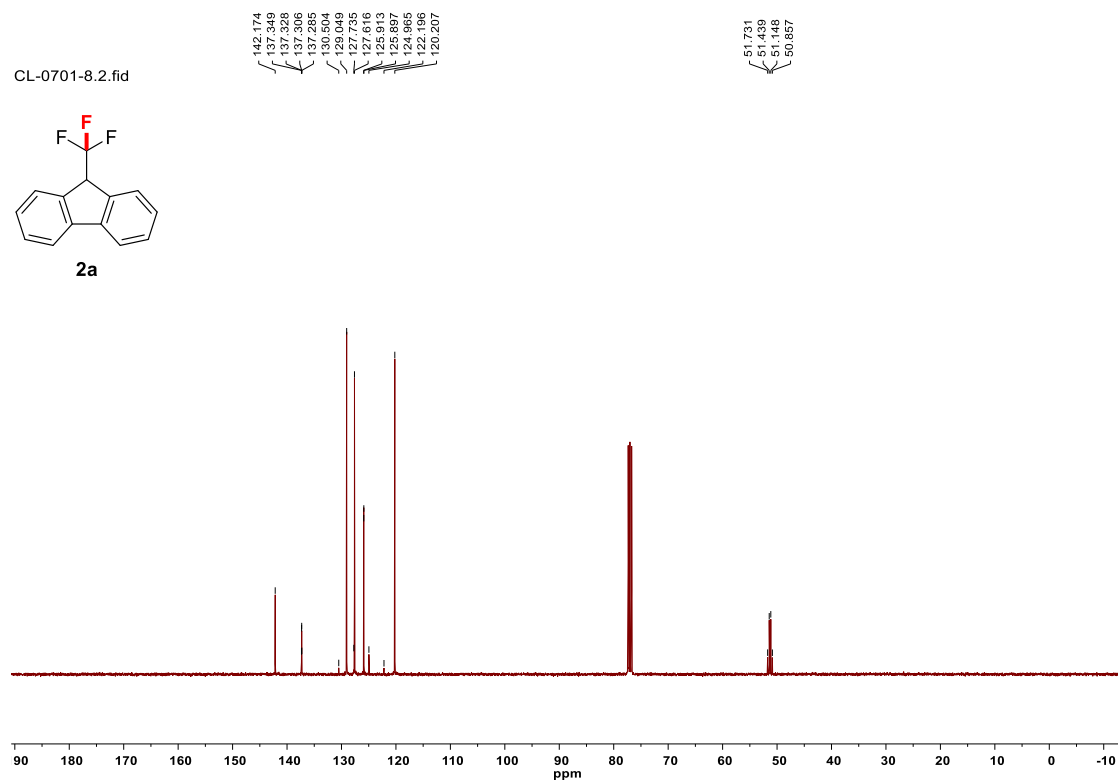

<sup>13</sup>C NMR spectrum of **2a** (101 MHz, CDCl<sub>3</sub>)



CL-0701-8-1.fid

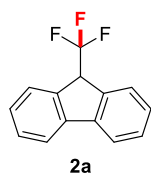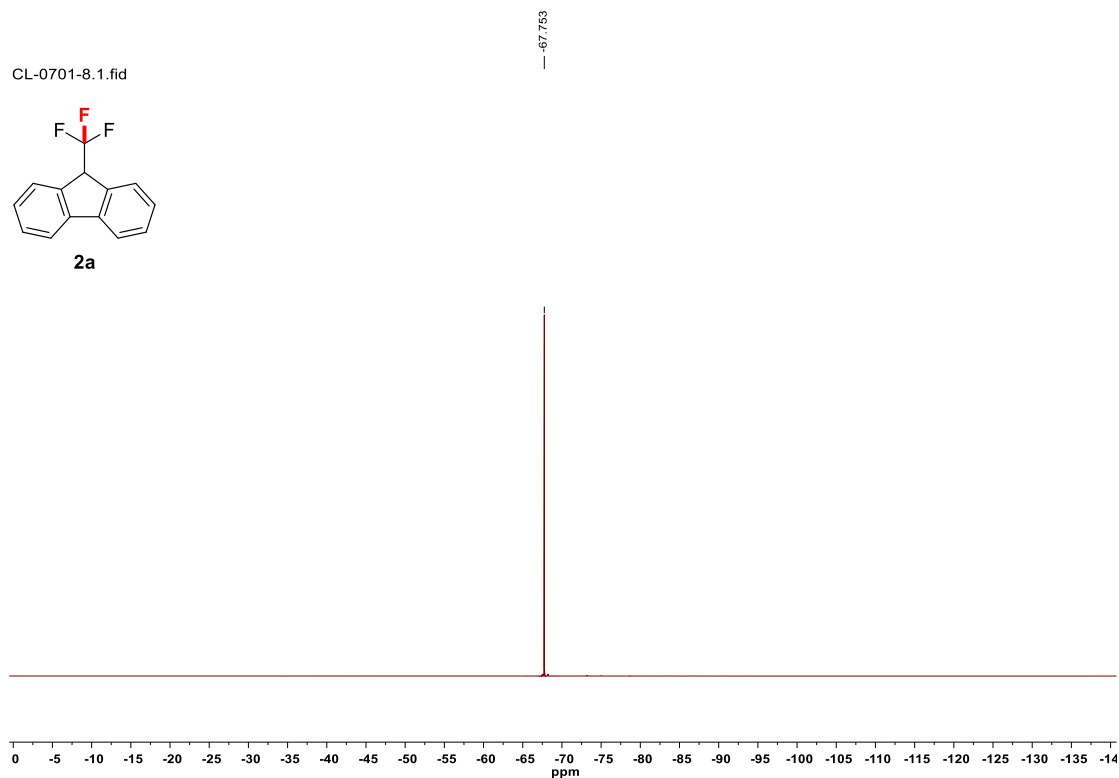

$^{19}\text{F}$  NMR spectrum of **2a** (376 MHz,  $\text{CDCl}_3$ )

CL-NMR-H-0524-1-1.fid

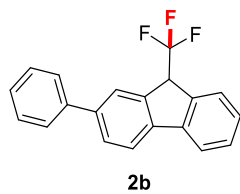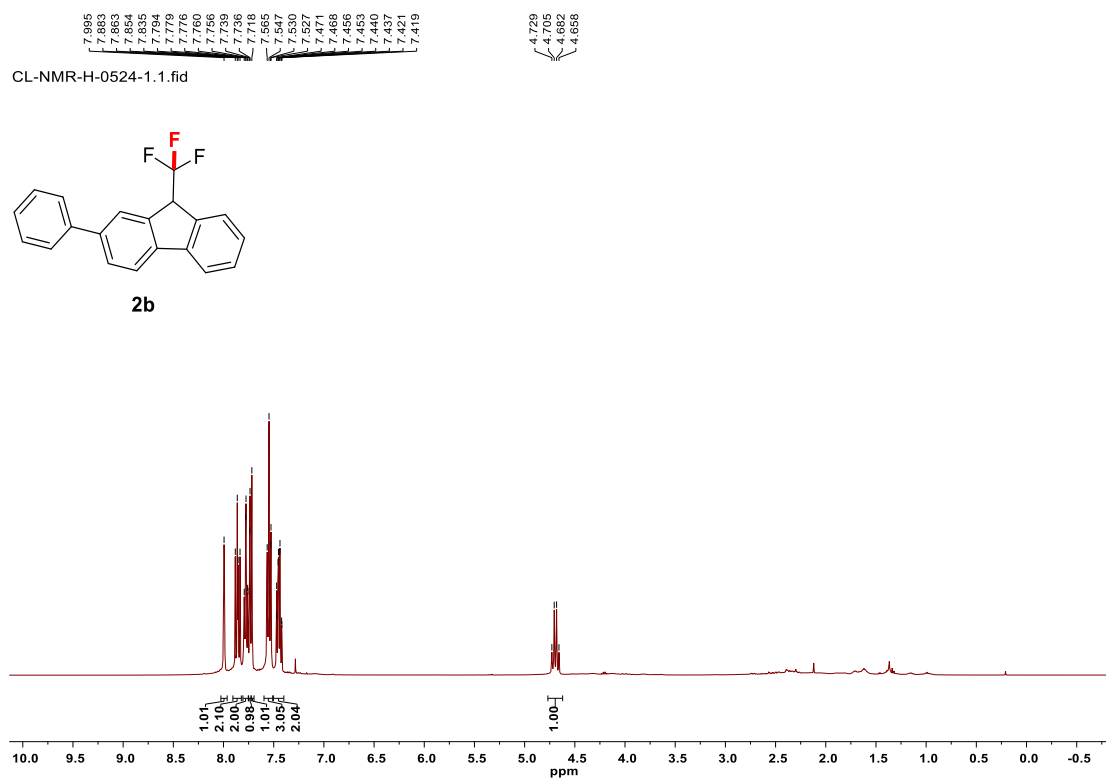

$^1\text{H}$  NMR spectrum of **2b** (400 MHz,  $\text{CDCl}_3$ )

CL-C-NMR-0526-1.2.fid

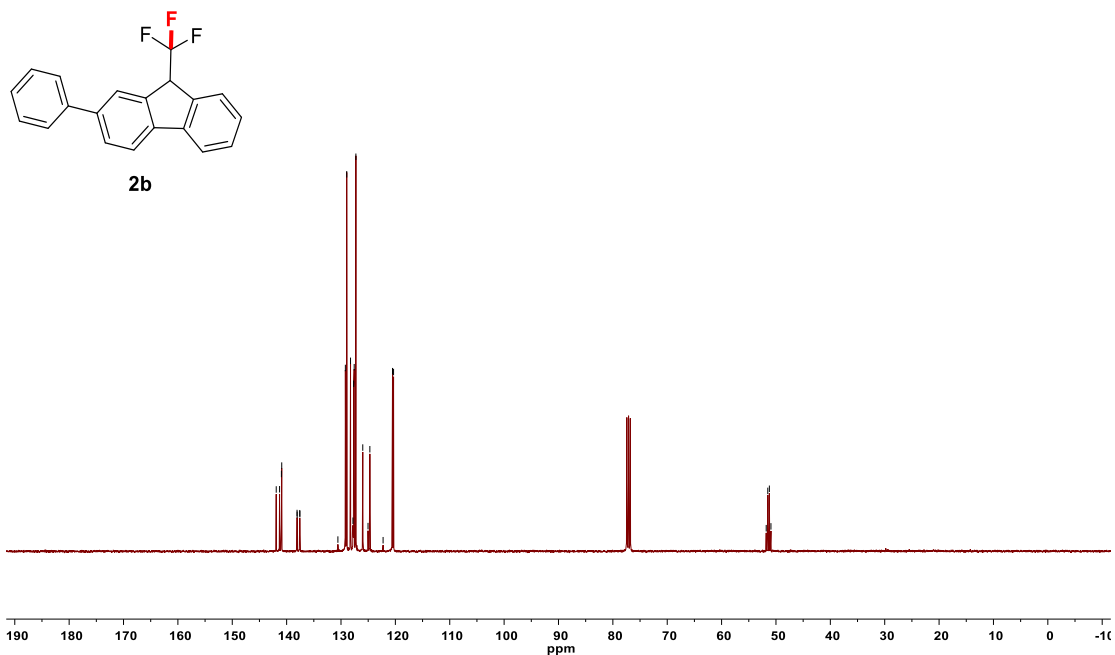

$^{13}\text{C}$  NMR spectrum of **2b** (101 MHz,  $\text{CDCl}_3$ )

CL-C-NMR-0526-1.1.fid

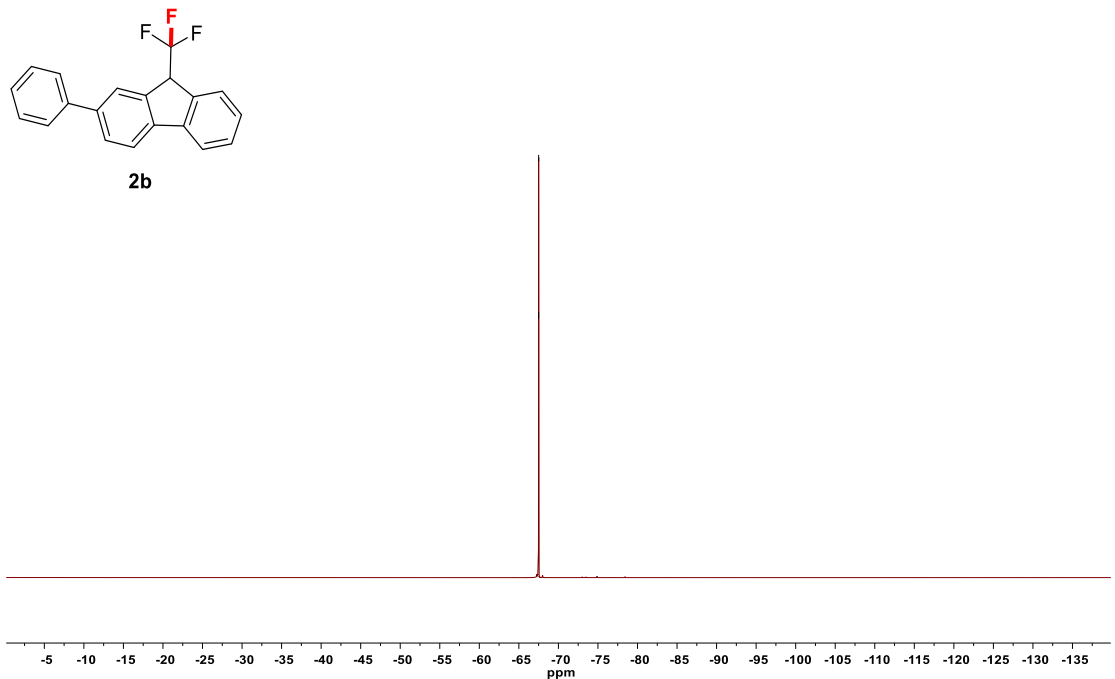

$^{19}\text{F}$  NMR spectrum of **2b** (376 MHz,  $\text{CDCl}_3$ )

CL-0629-5.1.fid

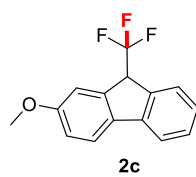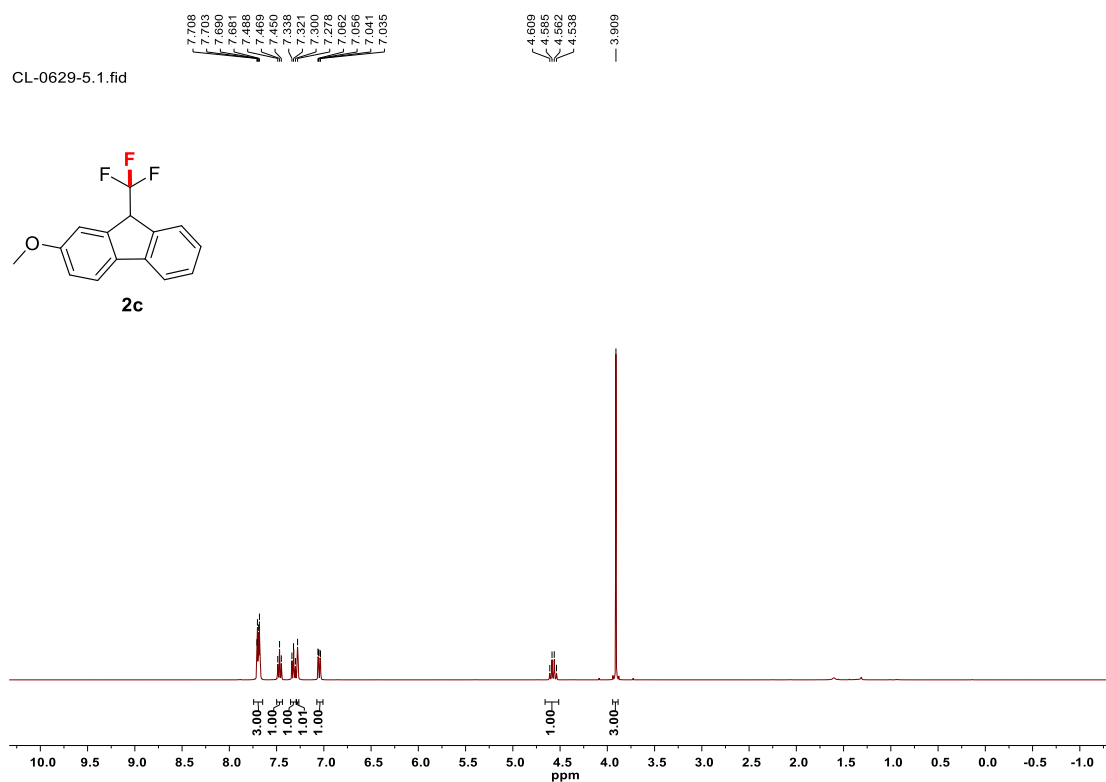

<sup>1</sup>H NMR spectrum of **2c** (400 MHz, CDCl<sub>3</sub>)

CL-0701-5.2.fid

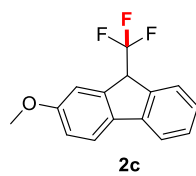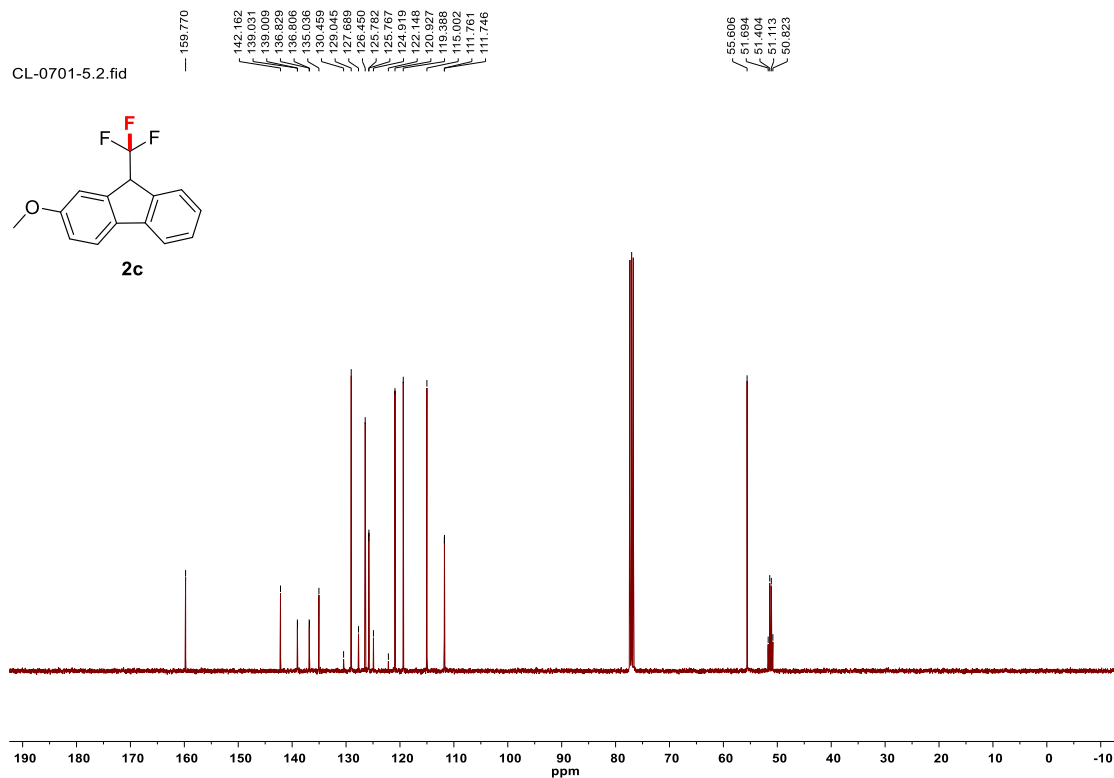

<sup>13</sup>C NMR spectrum of **2c** (101 MHz, CDCl<sub>3</sub>)

CL-0701-5.1.fid

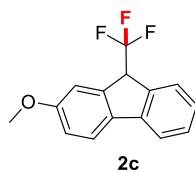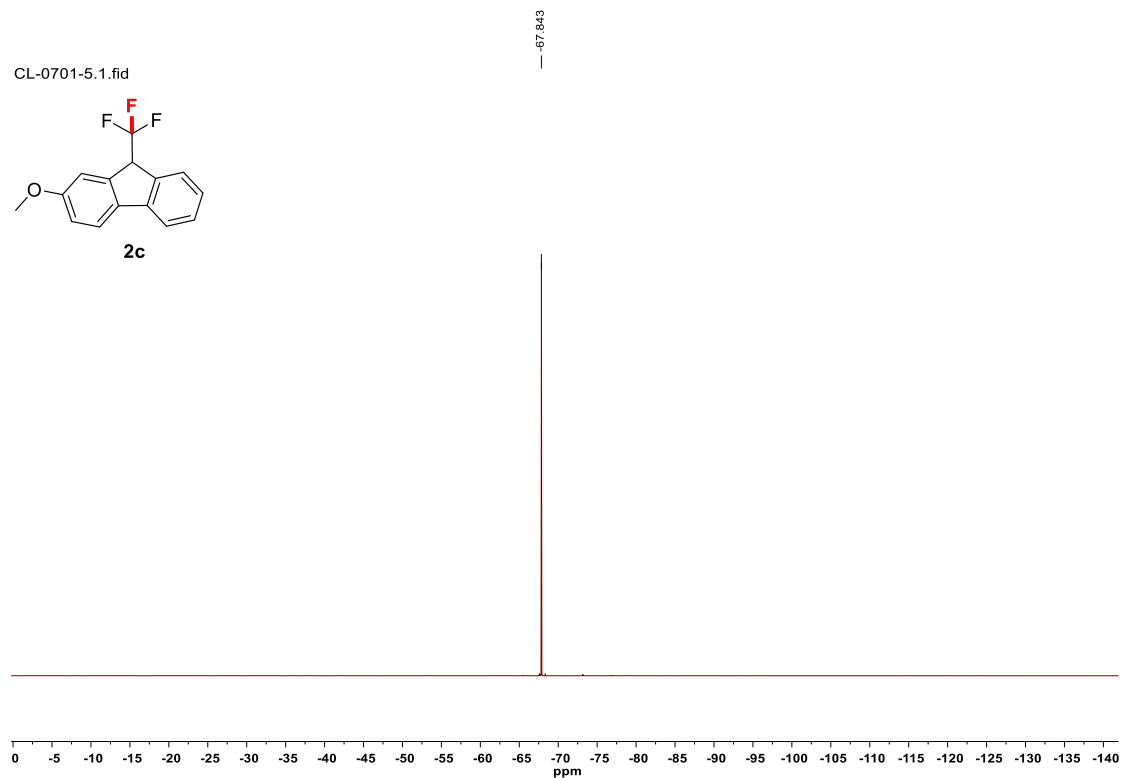

<sup>19</sup>F NMR spectrum of **2c** (376 MHz, CDCl<sub>3</sub>)

CL-NMR-H-0524-2.1.fid

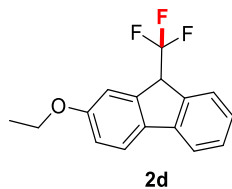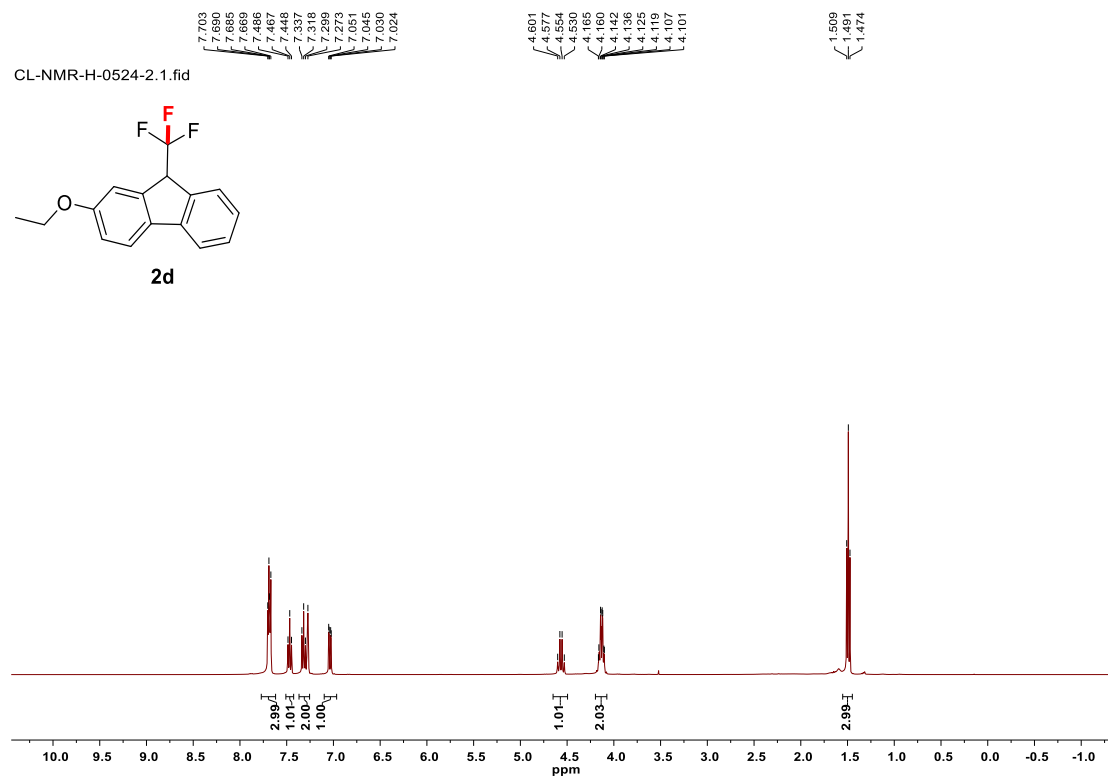

<sup>1</sup>H NMR spectrum of **2d** (400 MHz, CDCl<sub>3</sub>)

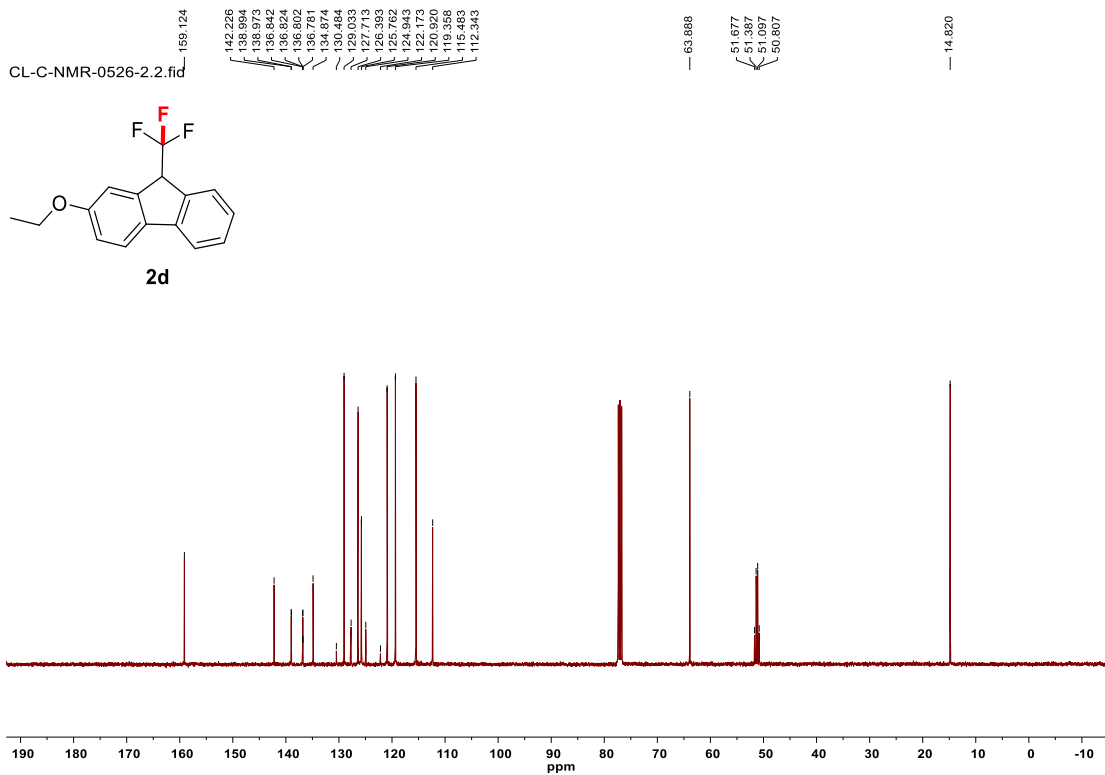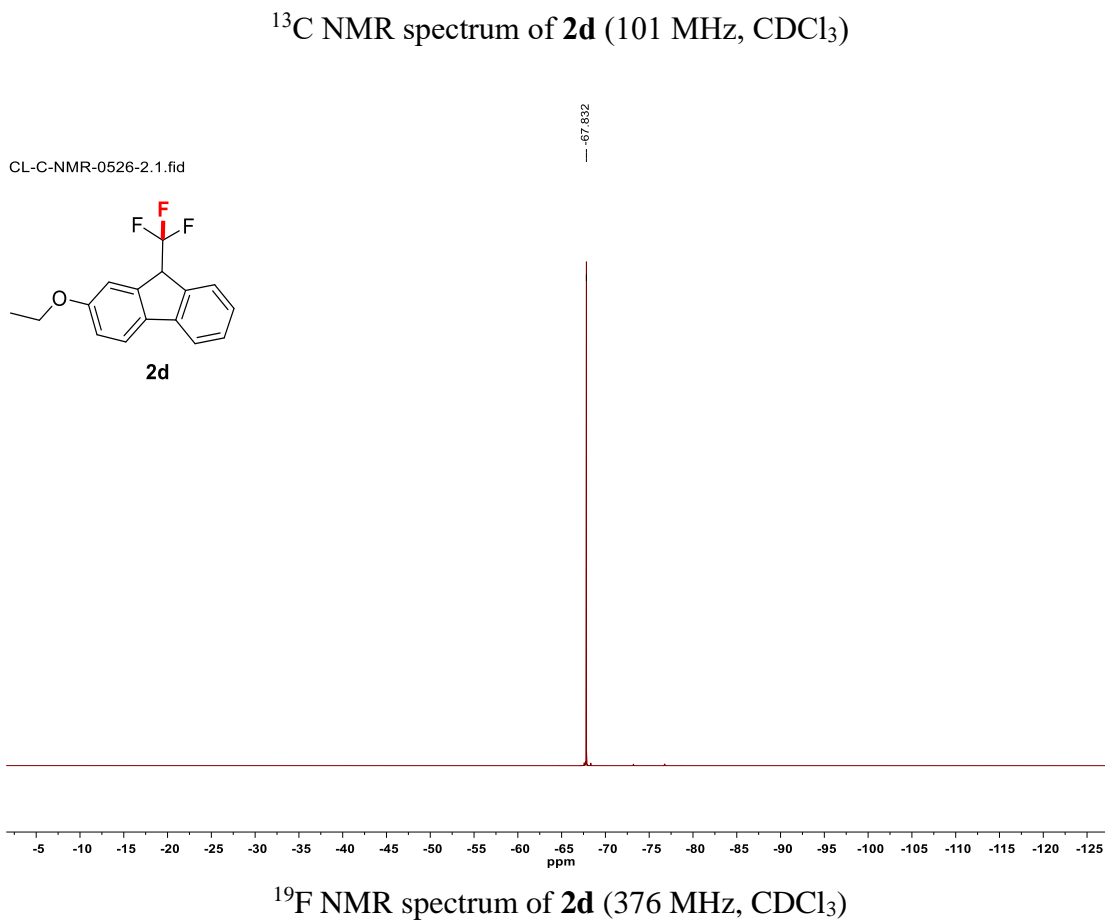

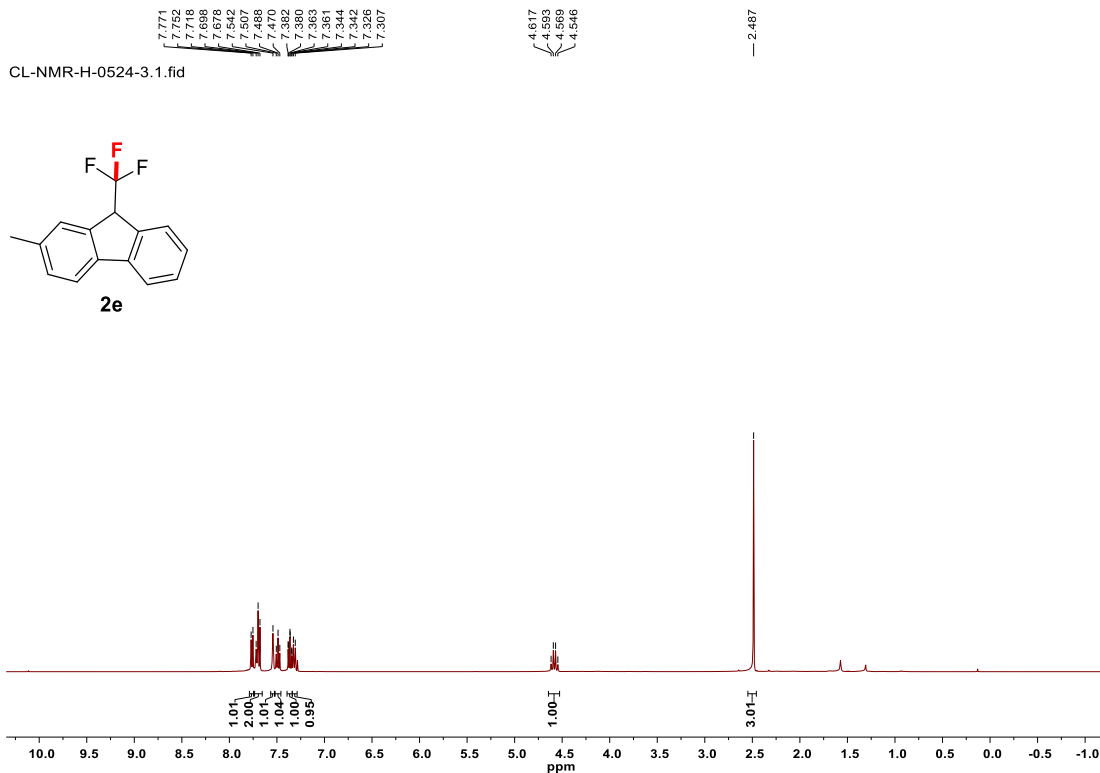

<sup>1</sup>H NMR spectrum of **2e** (400 MHz, CDCl<sub>3</sub>)

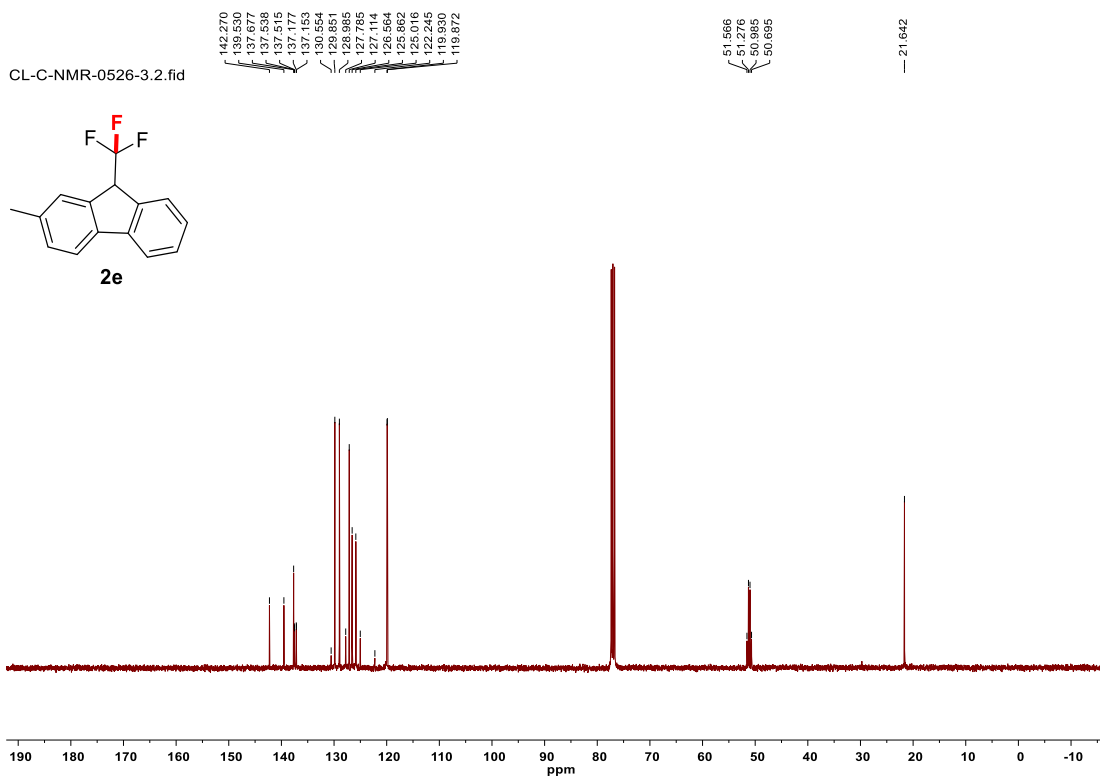

<sup>13</sup>C NMR spectrum of **2e** (101 MHz, CDCl<sub>3</sub>)

CL-C-NMR-0526-3.1.fid

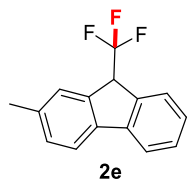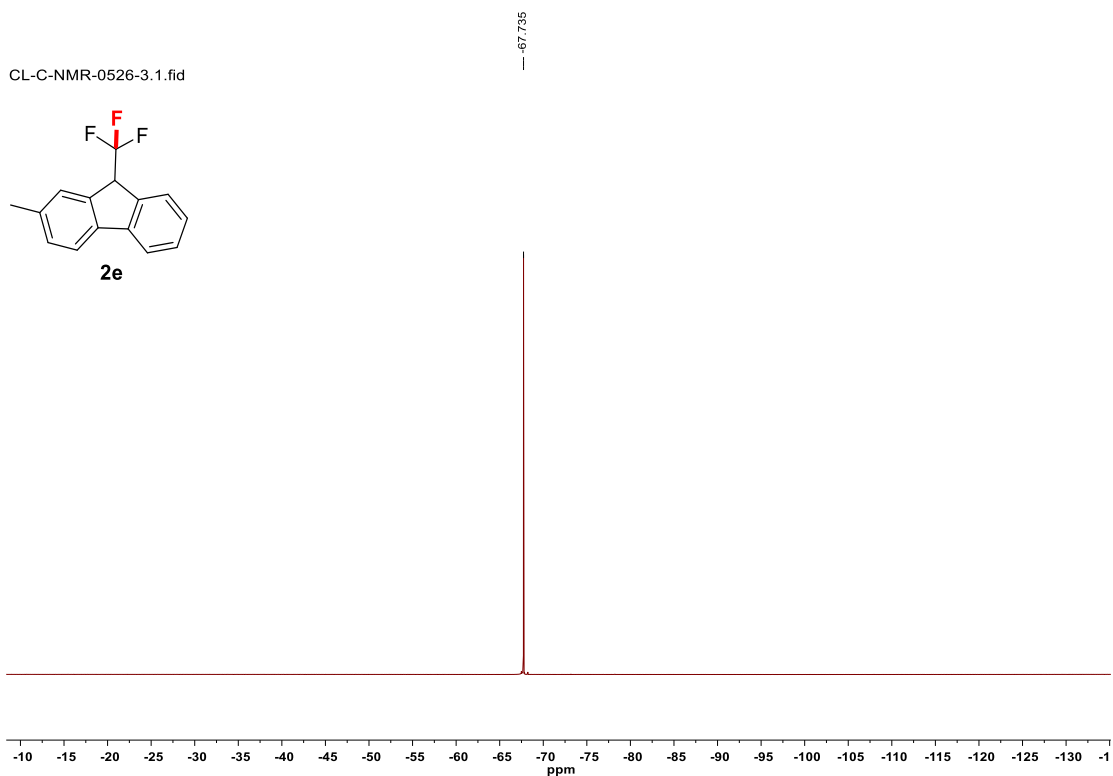

$^{19}\text{F}$  NMR spectrum of **2e** (376 MHz,  $\text{CDCl}_3$ )

CL-H-NMR-06-7.1.fid

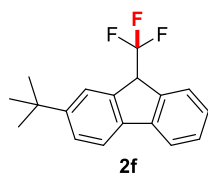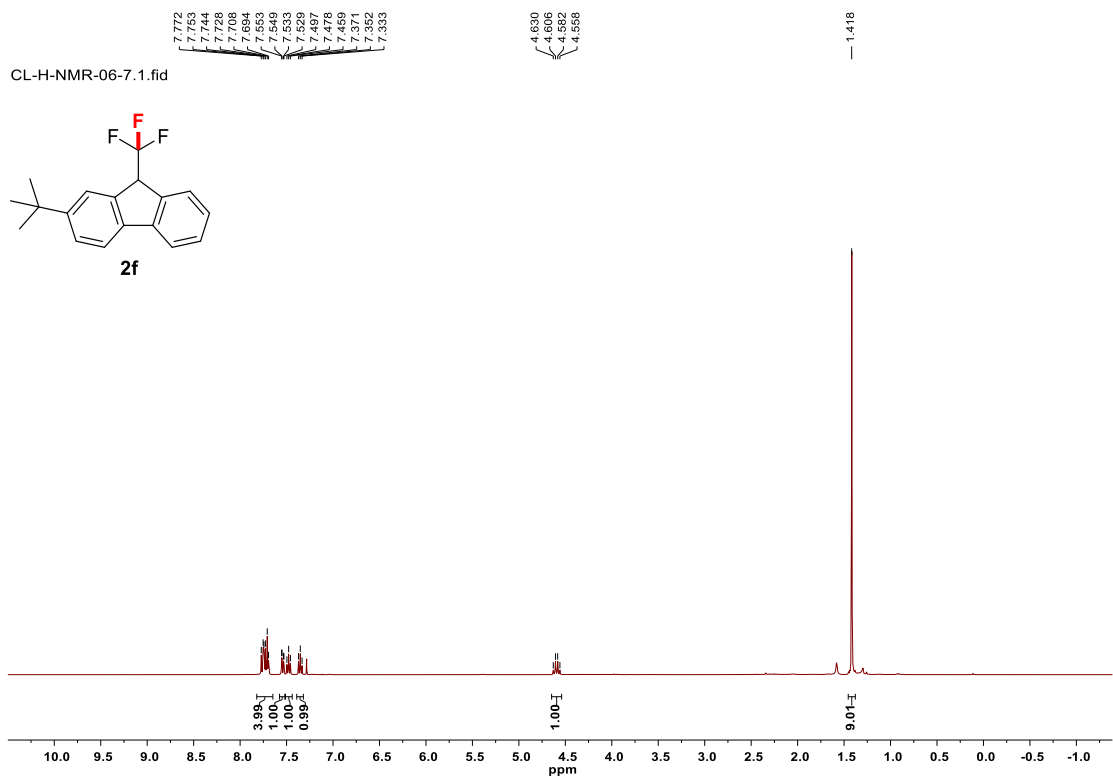

$^1\text{H}$  NMR spectrum of **2f** (400 MHz,  $\text{CDCl}_3$ )

CL-C-NMR-0607-7.1.fid

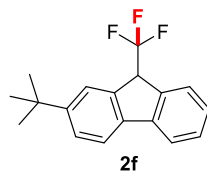

151.138  
142.211  
139.491  
137.990  
137.303  
137.280  
130.694  
128.957  
127.914  
126.183  
125.836  
125.044  
122.820  
122.808  
122.574  
119.687

51.702  
51.413  
51.124  
50.834

34.987  
31.488

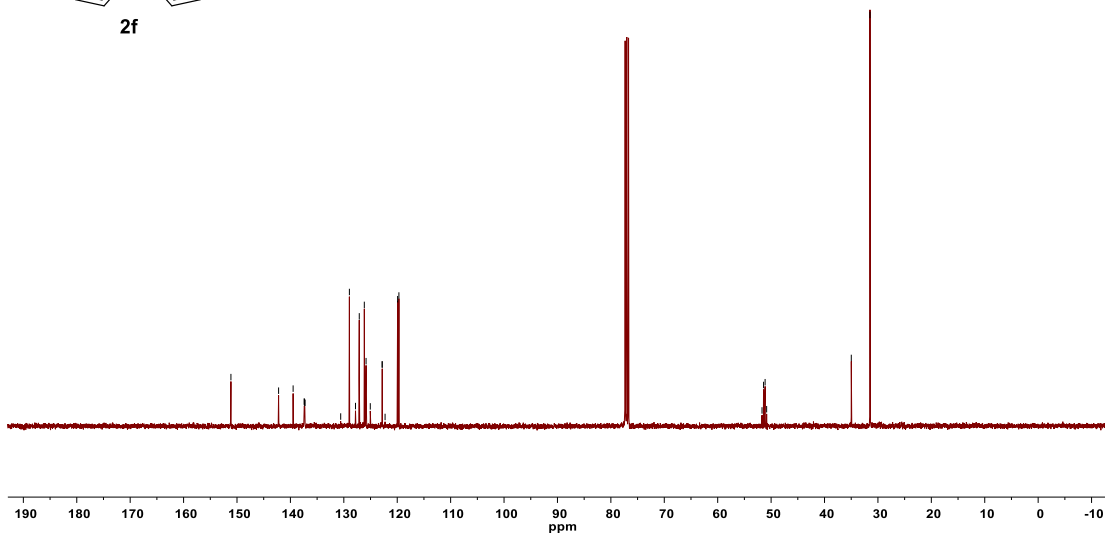

<sup>13</sup>C NMR spectrum of **2f** (101 MHz, CDCl<sub>3</sub>)

CL-C-NMR-0607-7.2.fid

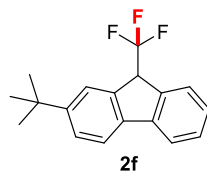

-67.722

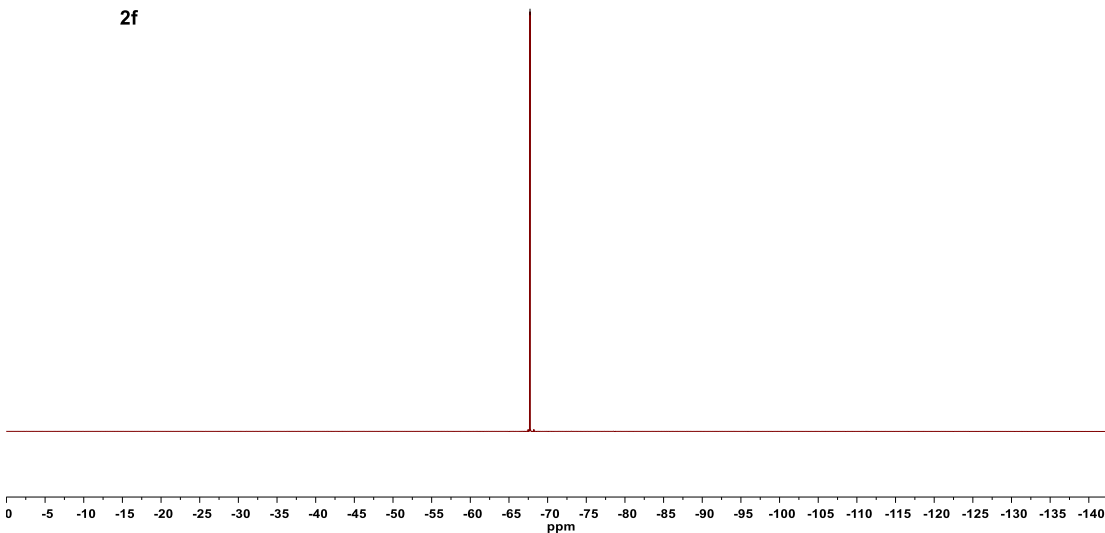

<sup>19</sup>F NMR spectrum of **2f** (376 MHz, CDCl<sub>3</sub>)



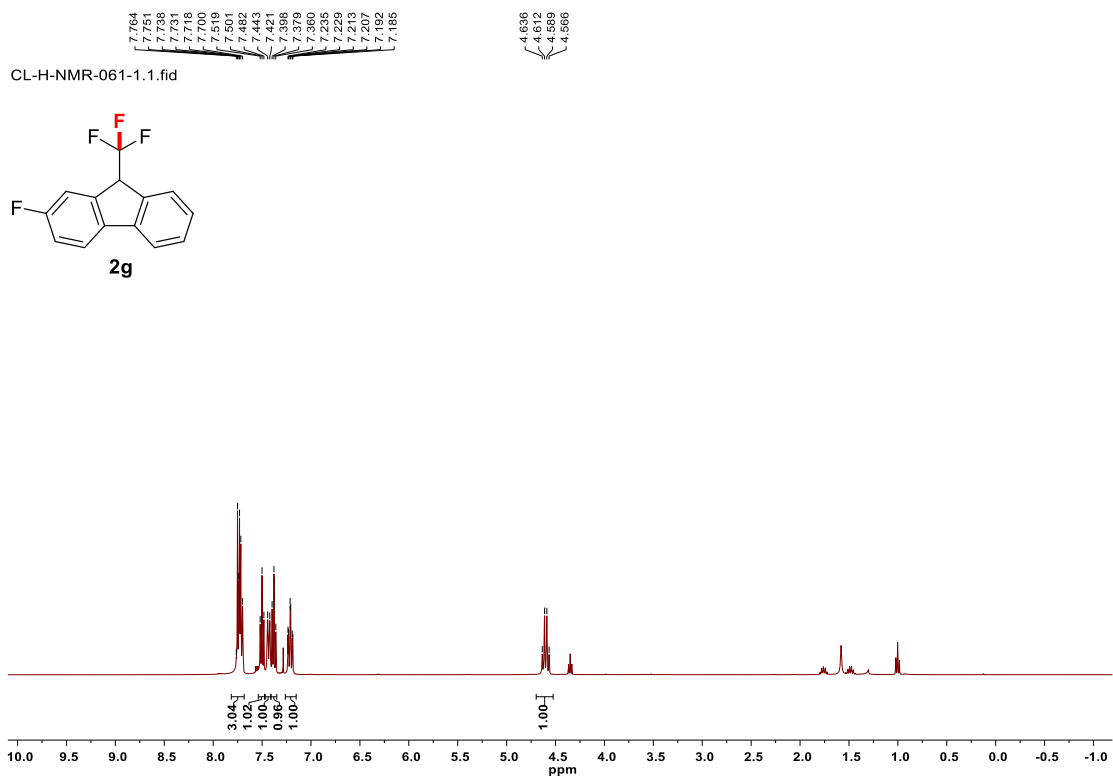

$^1\text{H}$  NMR spectrum of **2g** (400 MHz,  $\text{CDCl}_3$ )

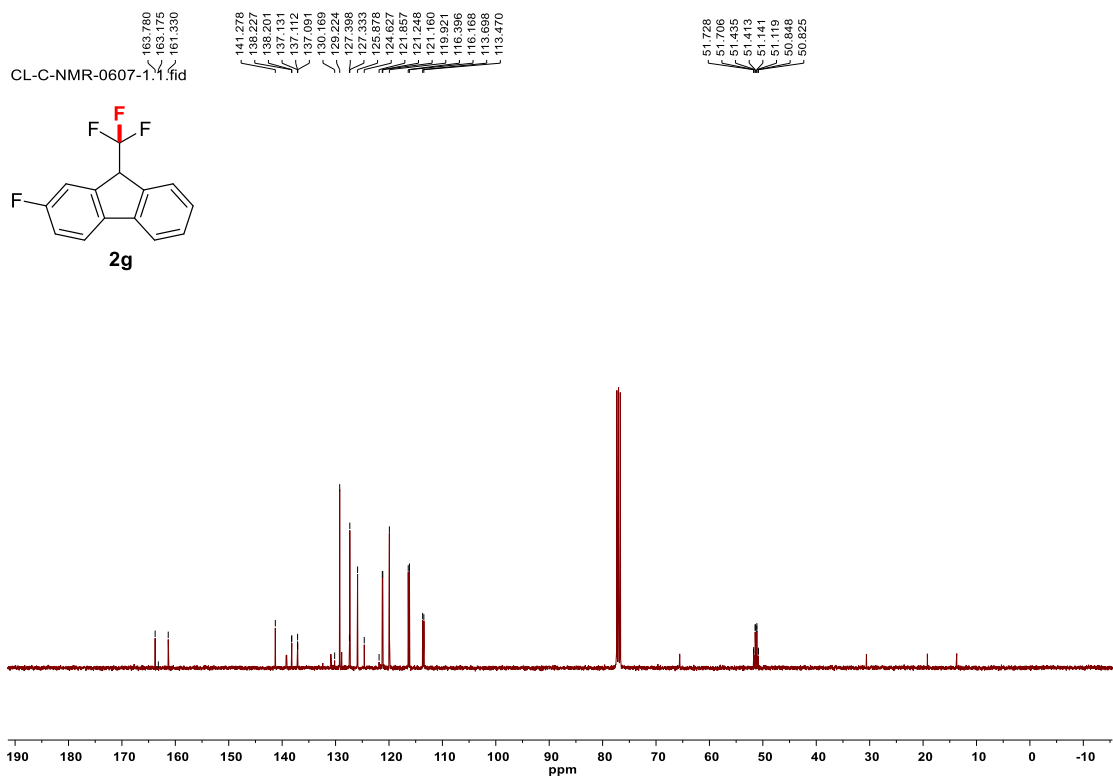

$^{13}\text{C}$  NMR spectrum of **2g** (101 MHz,  $\text{CDCl}_3$ )

CL-C-NMR-0607-1.2.fid

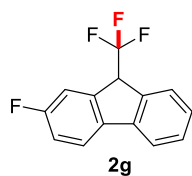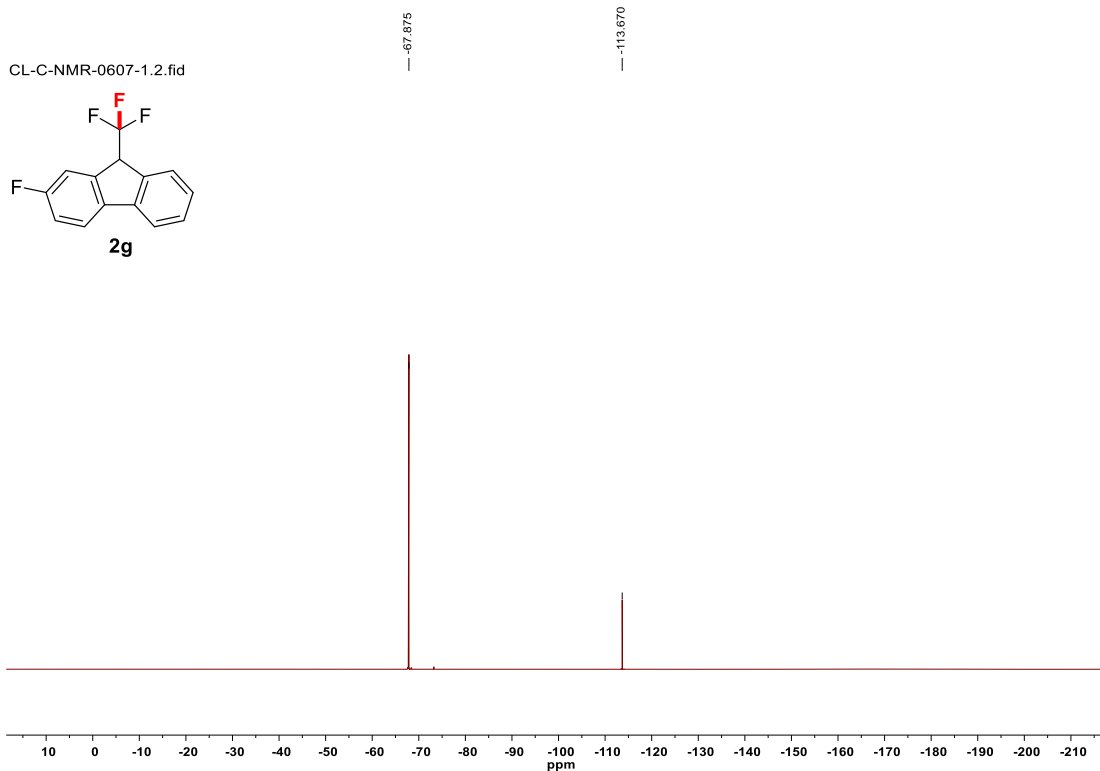

<sup>19</sup>F NMR spectrum of **2g** (376 MHz, CDCl<sub>3</sub>)

CL-H-NMR-061-3.1.fid

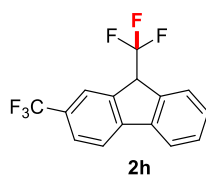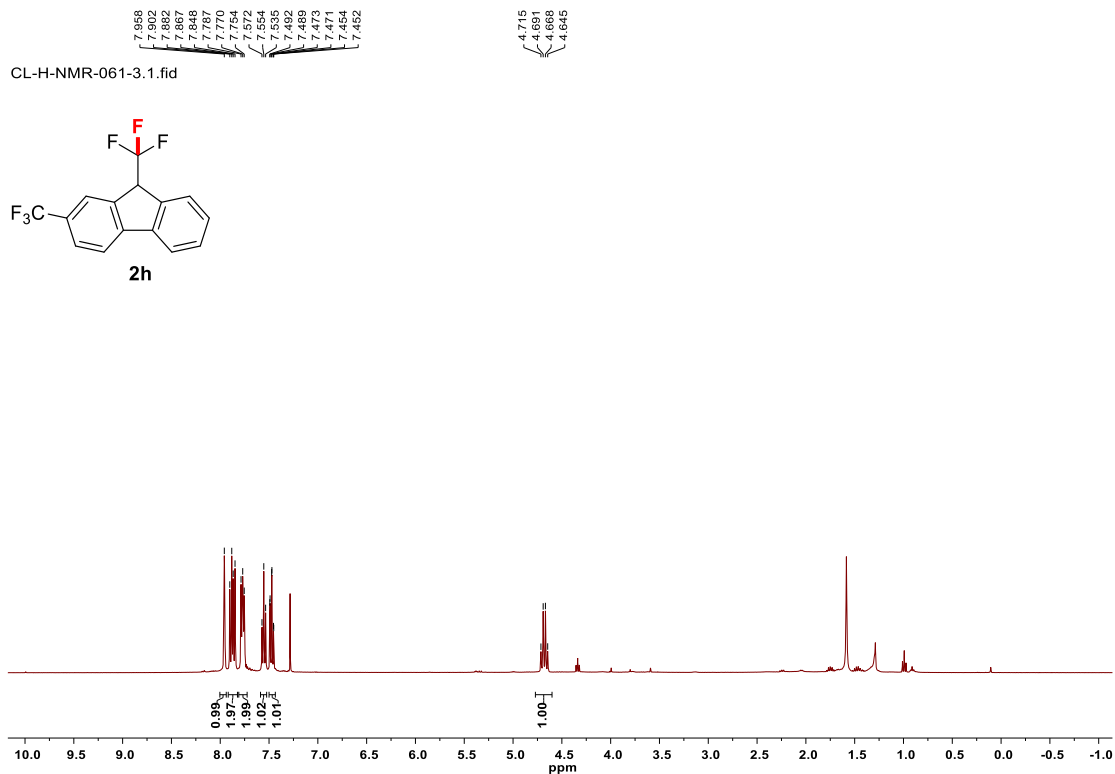

<sup>1</sup>H NMR spectrum of **2h** (400 MHz, CDCl<sub>3</sub>)

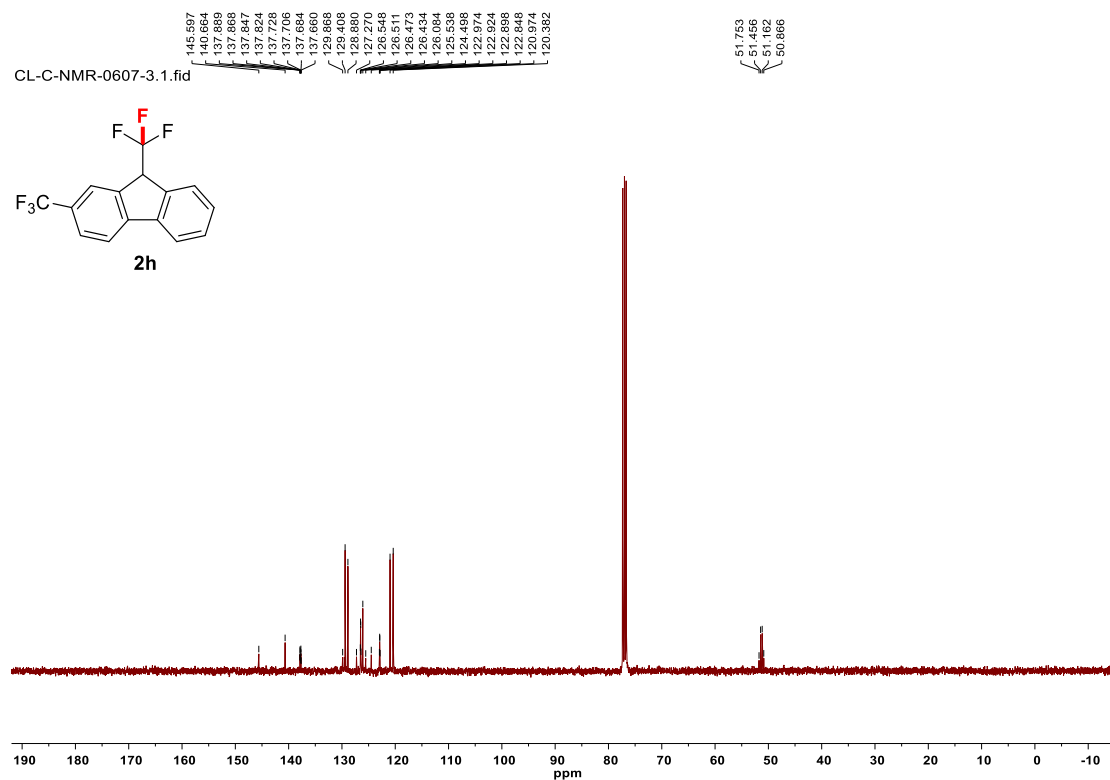

**<sup>13</sup>C NMR spectrum of 2h (101 MHz, CDCl<sub>3</sub>)**

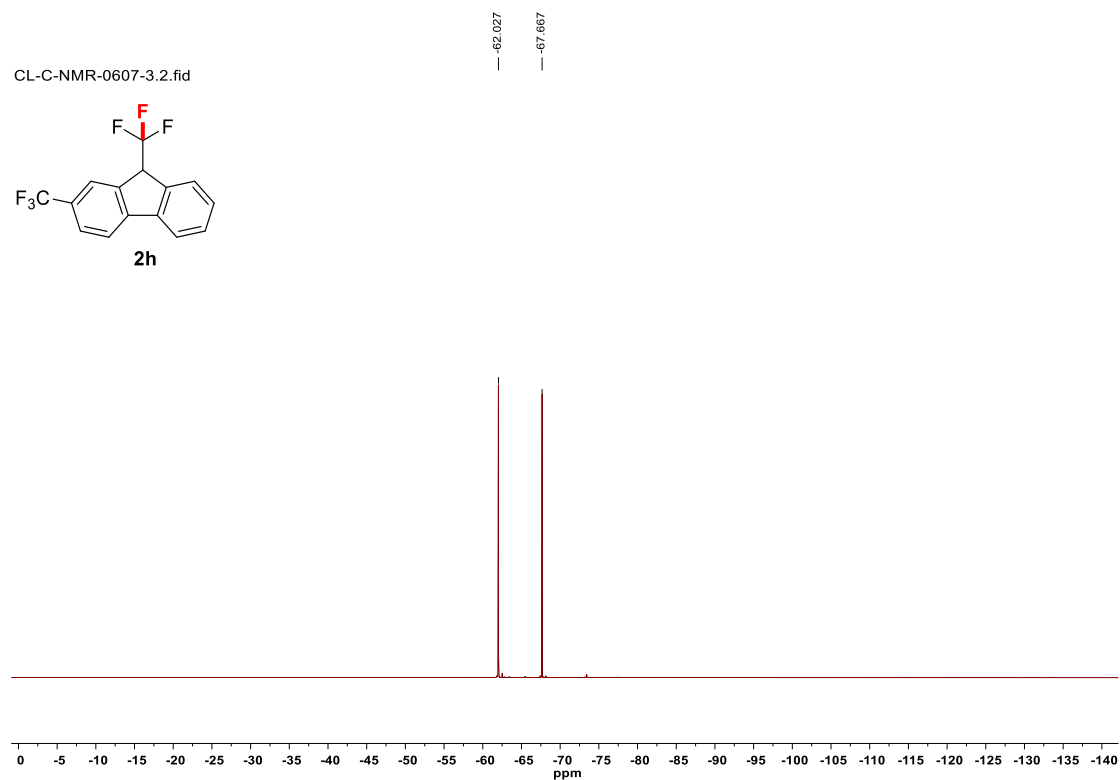

**<sup>19</sup>F NMR spectrum of 2h (376 MHz, CDCl<sub>3</sub>)**

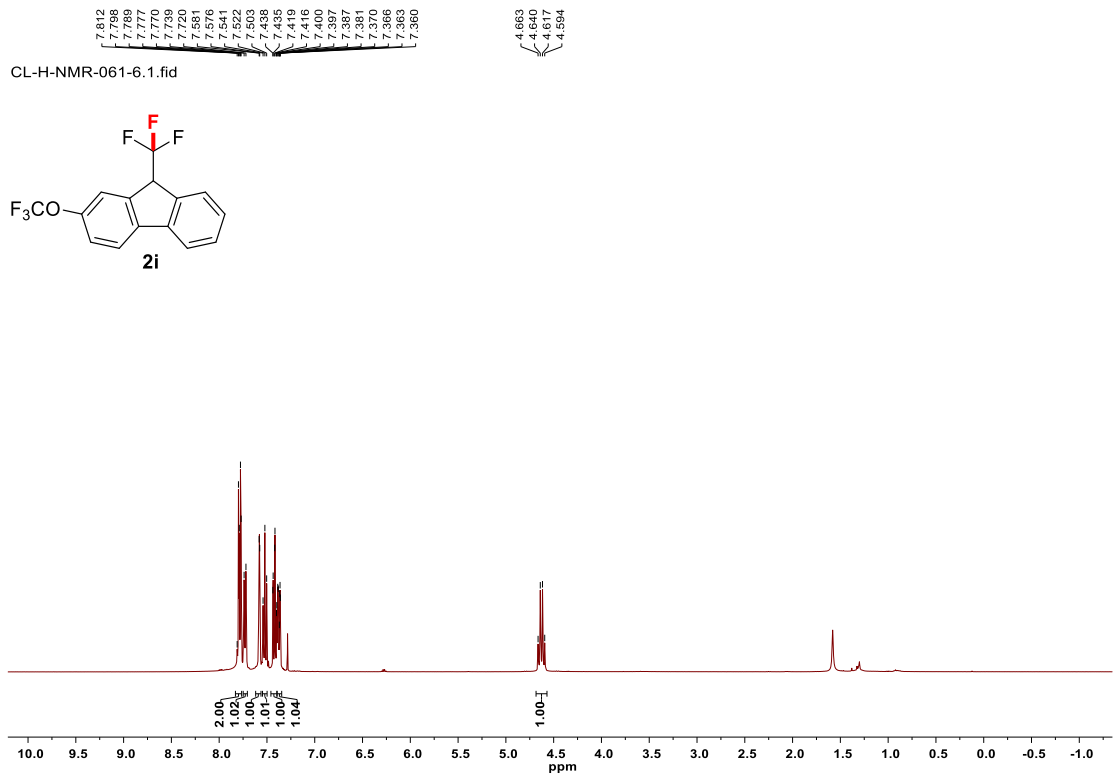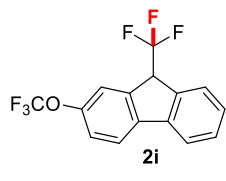

<sup>1</sup>H NMR spectrum of **2i** (400 MHz, CDCl<sub>3</sub>)

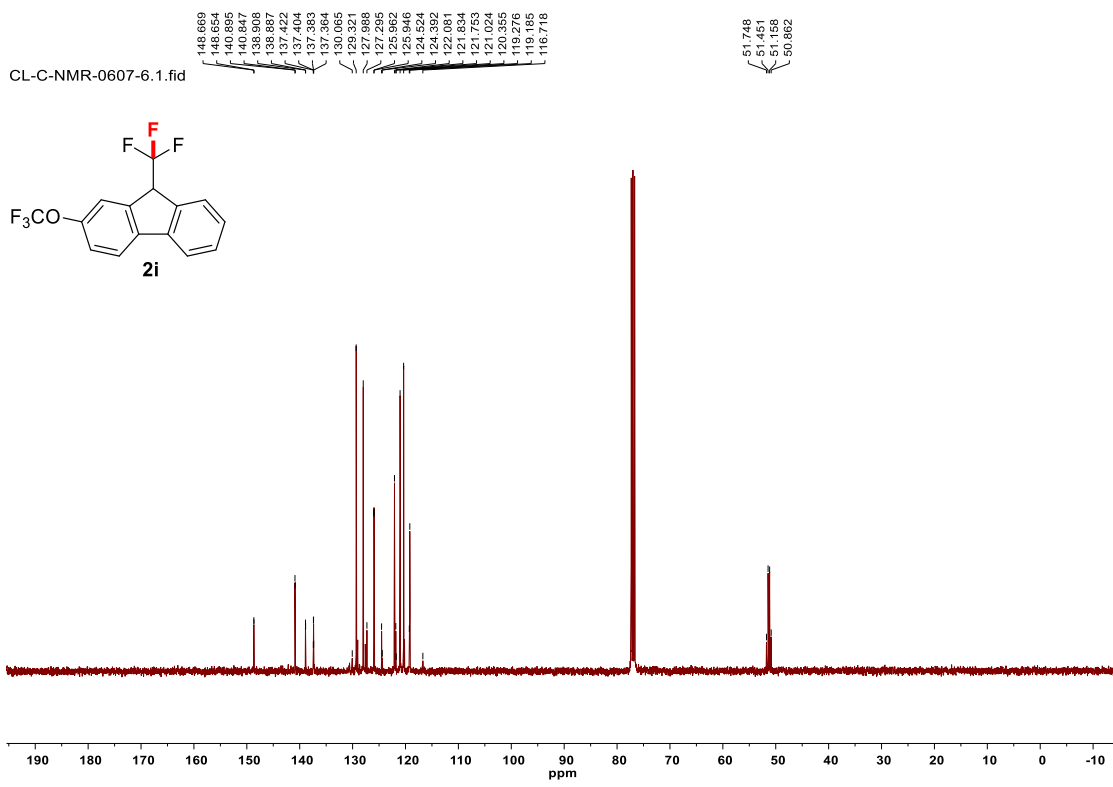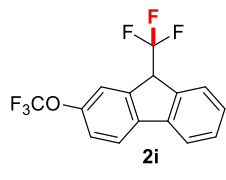

<sup>13</sup>C NMR spectrum of **2i** (101 MHz, CDCl<sub>3</sub>)



CL-0701-4.2.fid

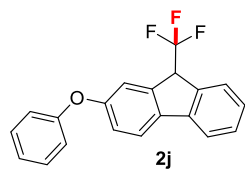

157.230  
157.160  
141.736  
139.174  
139.153  
139.152  
138.109  
137.434  
137.177  
137.159  
137.138  
137.117  
137.077  
129.876  
129.152  
127.536  
127.044  
125.876  
125.881  
125.866  
123.506  
121.994  
121.124  
119.789  
119.767  
118.853  
118.831  
116.837

51.710  
51.418  
51.127  
50.834

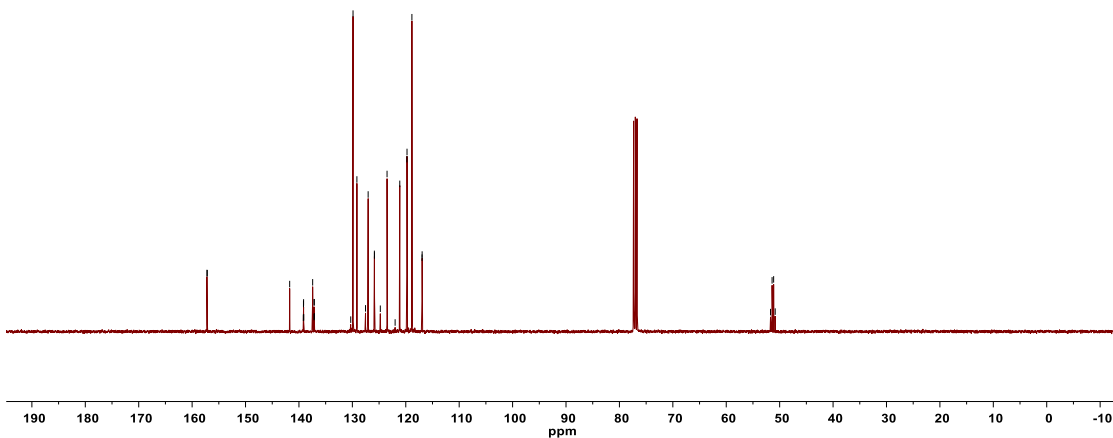

<sup>13</sup>C NMR spectrum of **2j** (101 MHz, CDCl<sub>3</sub>)

CL-0701-4.1.fid

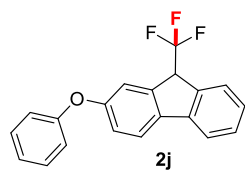

-67.809

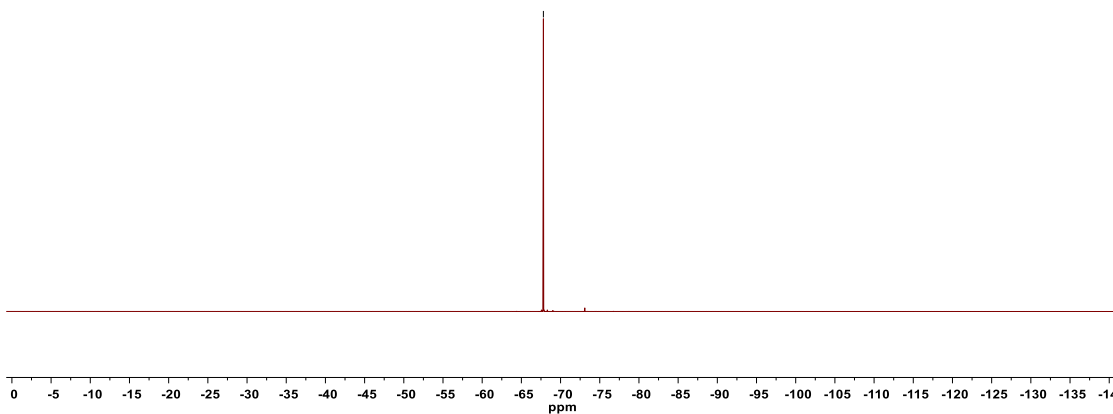

<sup>19</sup>F NMR spectrum of **2j** (376 MHz, CDCl<sub>3</sub>)

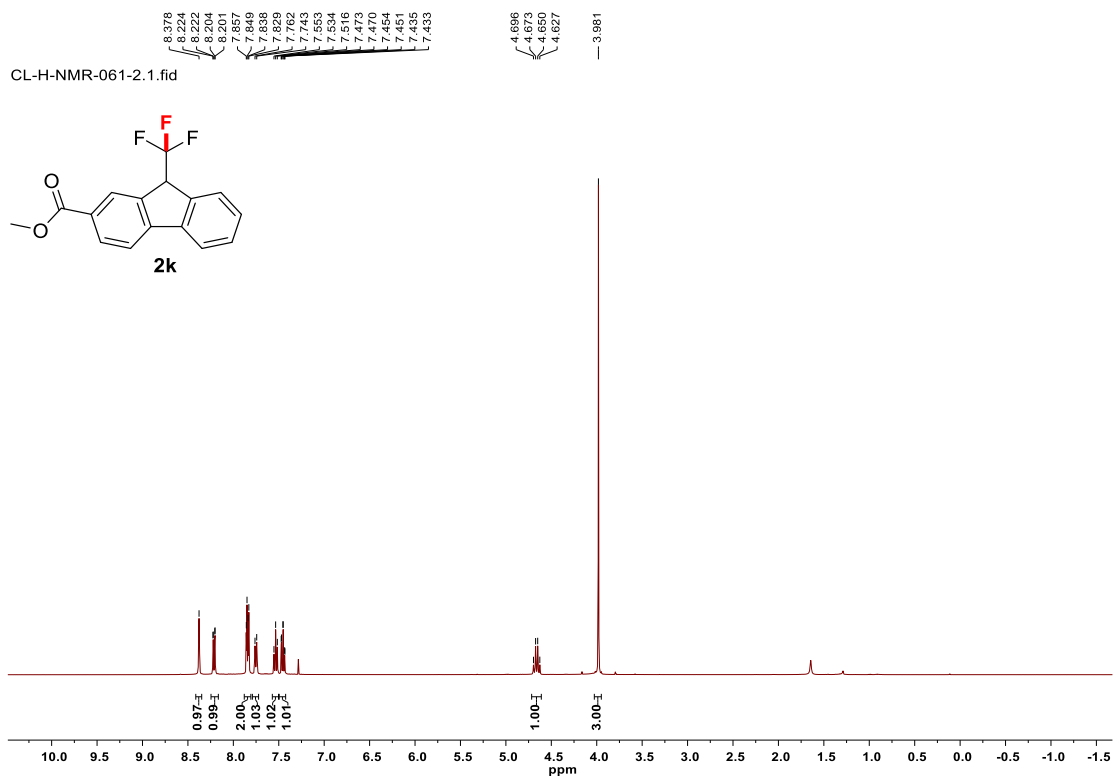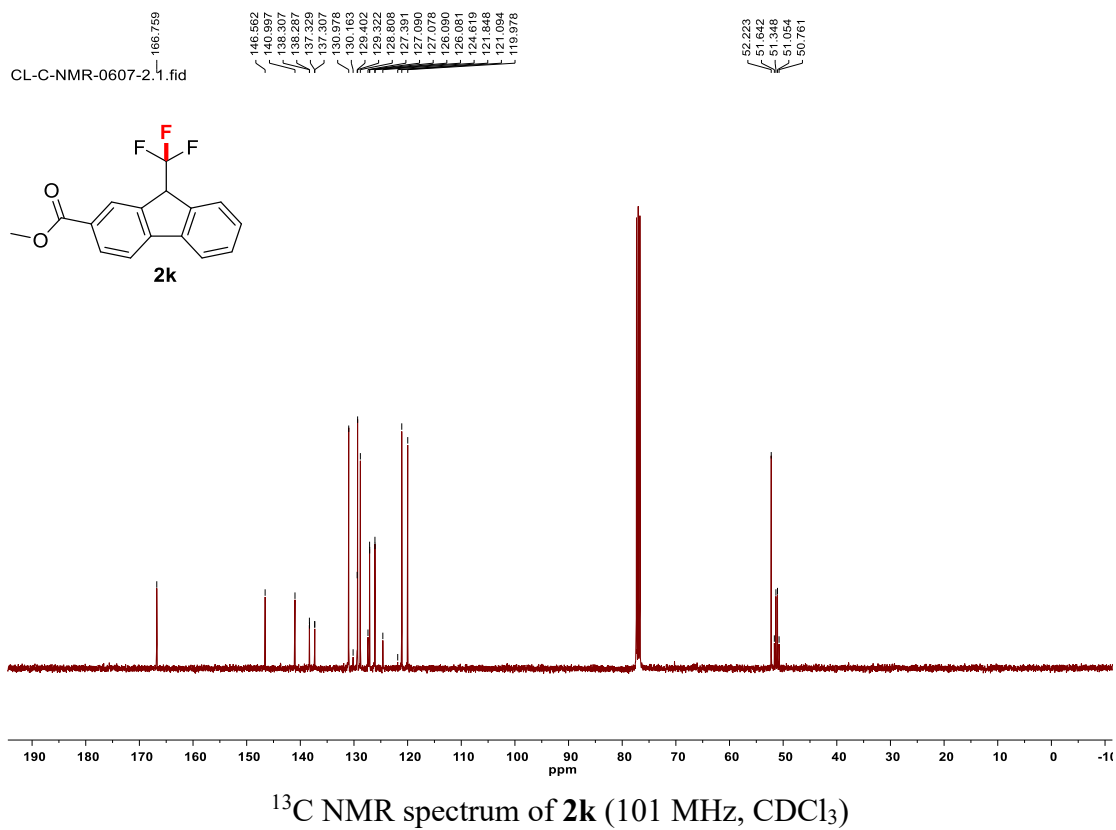

CL-C-NMR-0607-2.2.fid

— 67.612

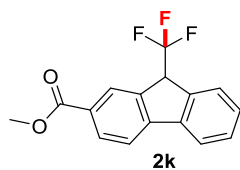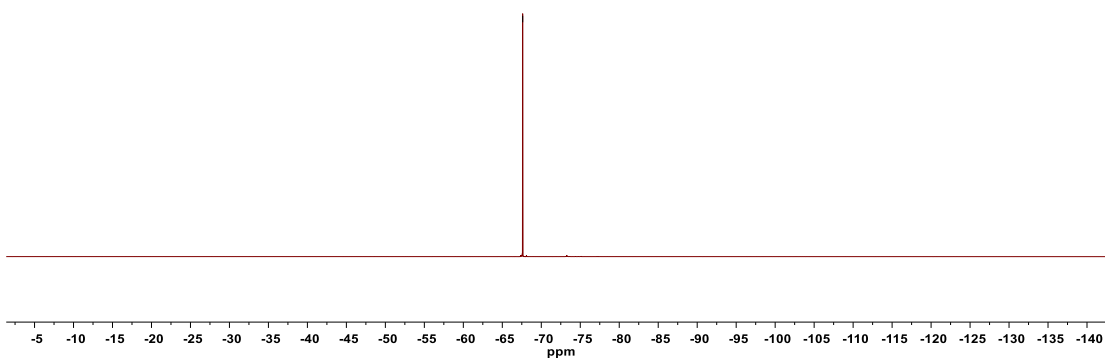

$^{19}\text{F}$  NMR spectrum of **2k** (376 MHz,  $\text{CDCl}_3$ )

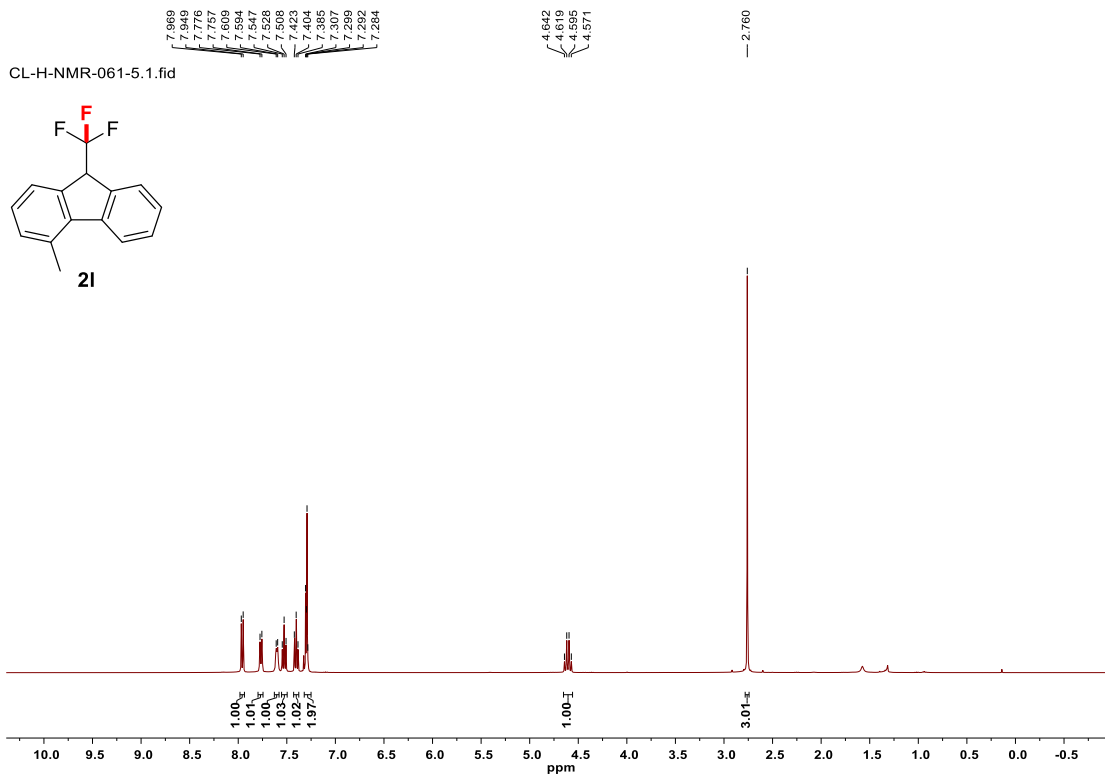

$^1\text{H}$  NMR spectrum of **2l** (400 MHz,  $\text{CDCl}_3$ )



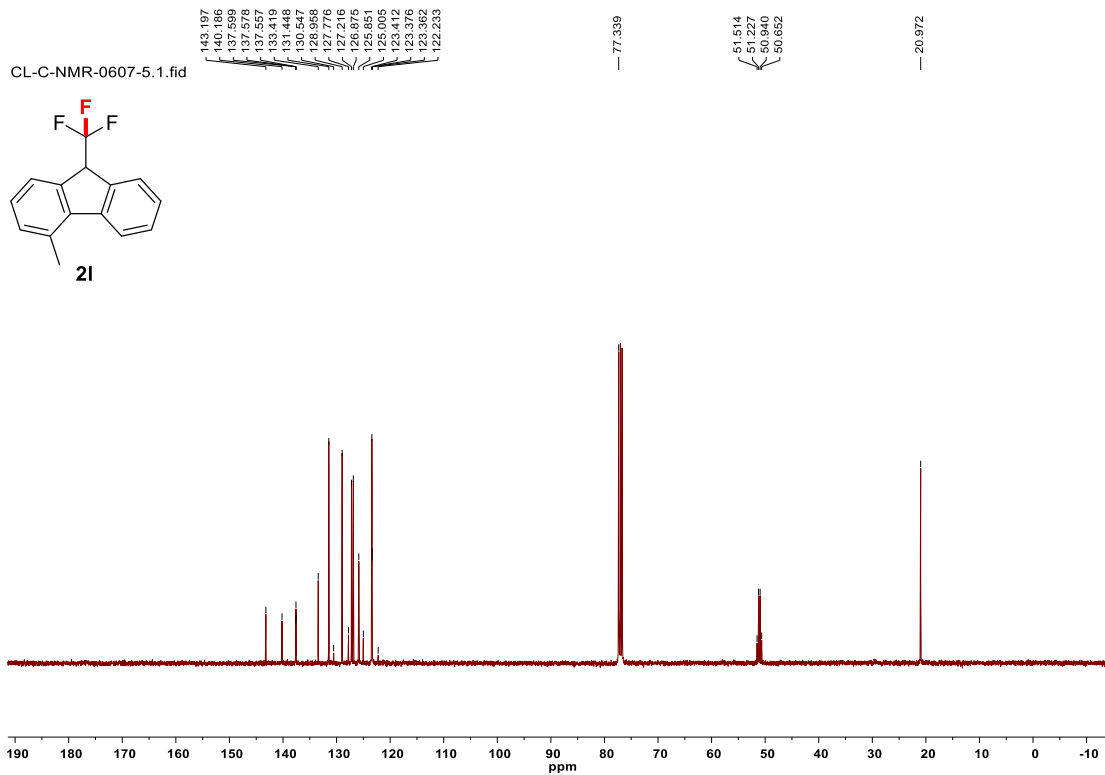

$^{13}\text{C}$  NMR spectrum of **2I** (101 MHz,  $\text{CDCl}_3$ )

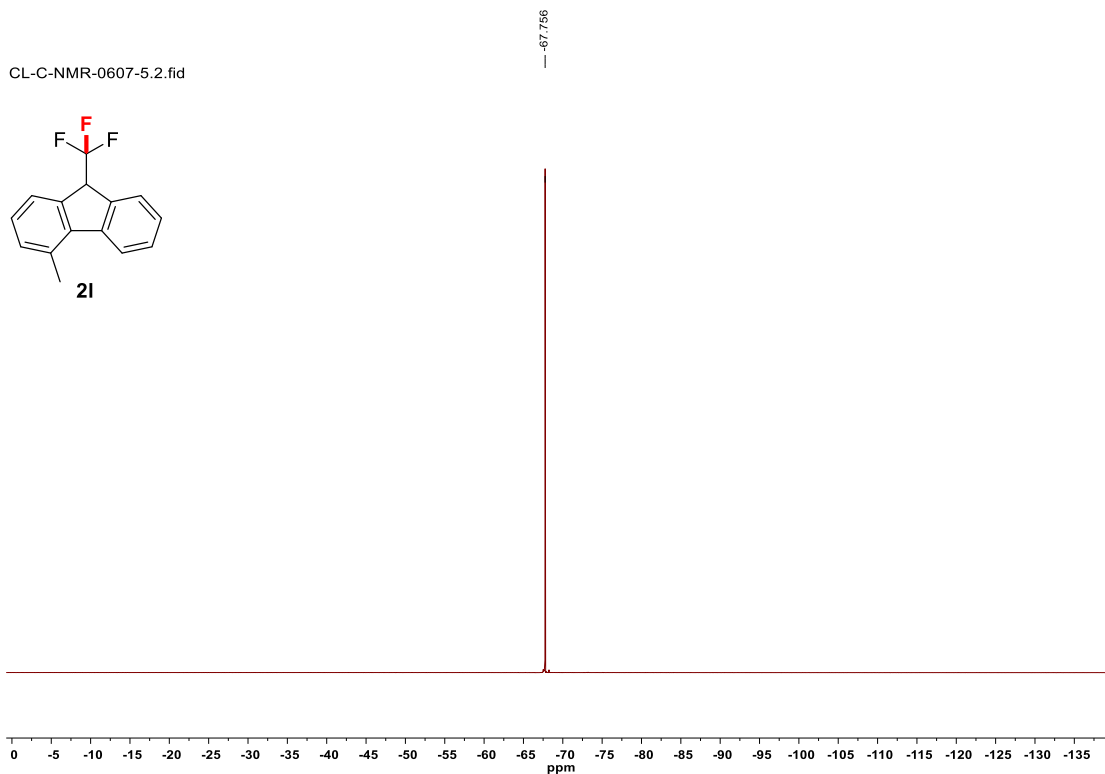

$^{19}\text{F}$  NMR spectrum of **2I** (376 MHz,  $\text{CDCl}_3$ )

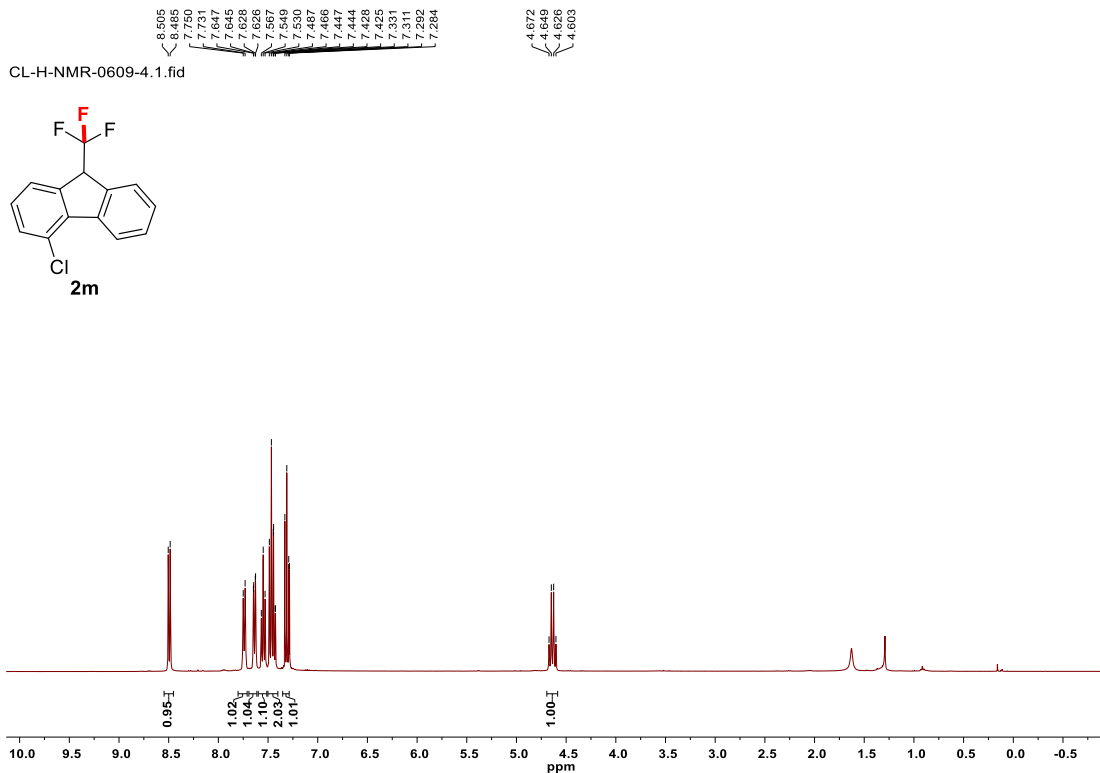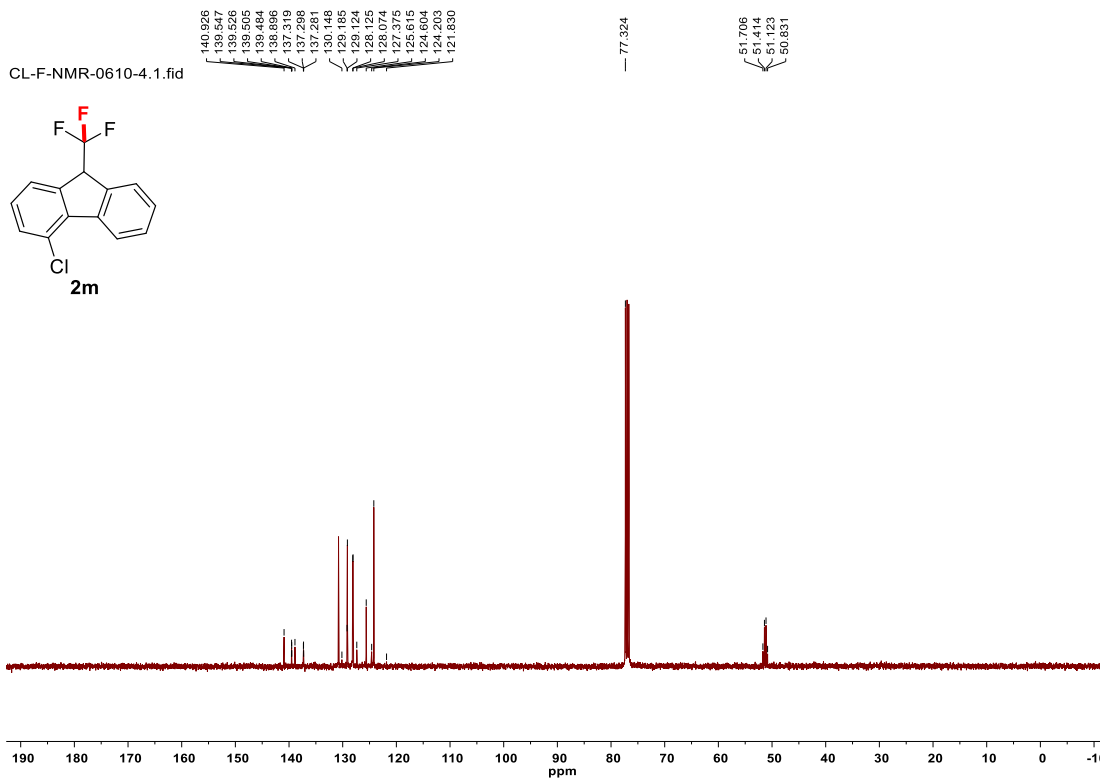

CL-F-NMR-0610-4.2.fid

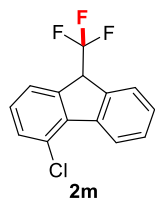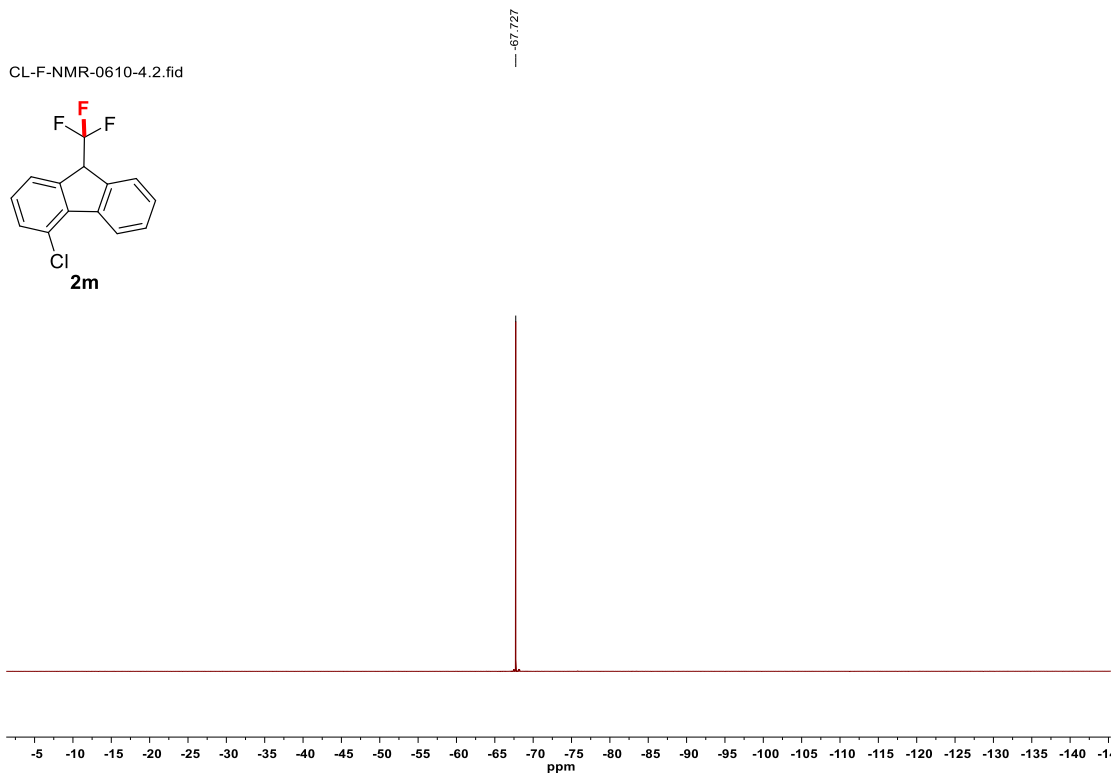

$^{19}\text{F}$  NMR spectrum of **2m** (376 MHz,  $\text{CDCl}_3$ )

CL-0629-2.1.fid

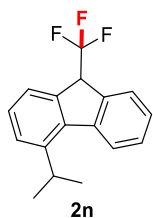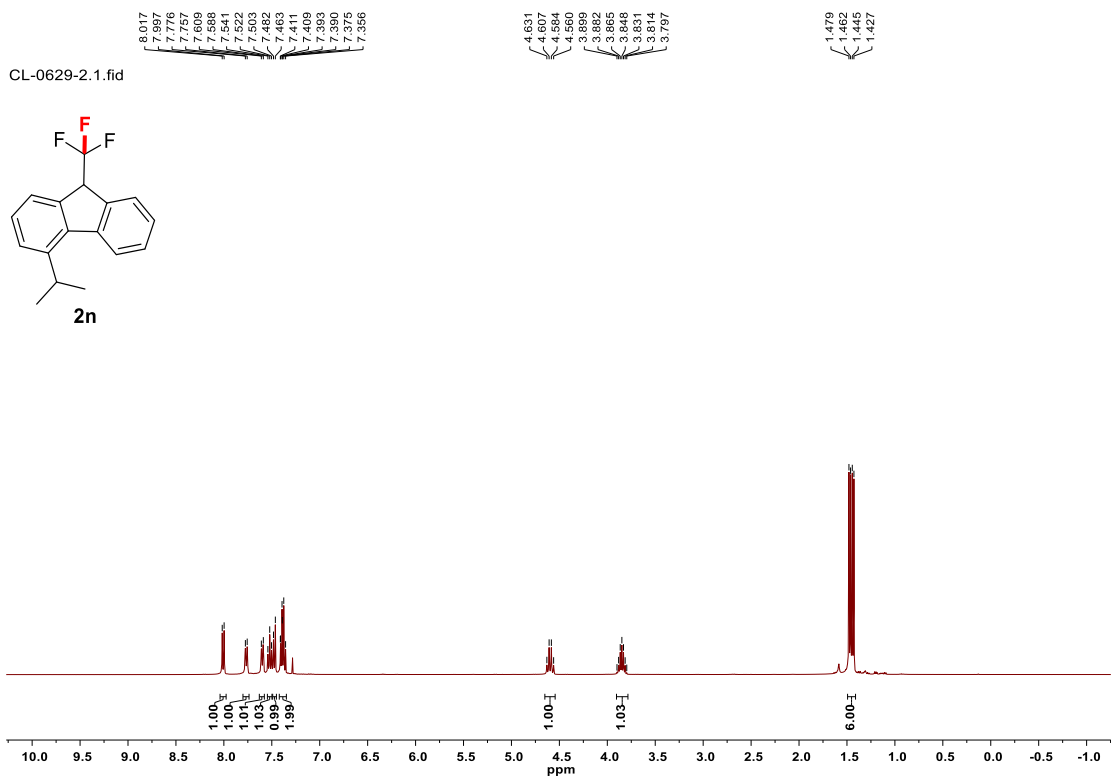

$^1\text{H}$  NMR spectrum of **2n** (400 MHz,  $\text{CDCl}_3$ )

CL-0701-2.2.fid

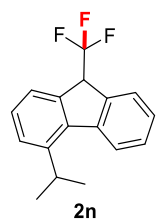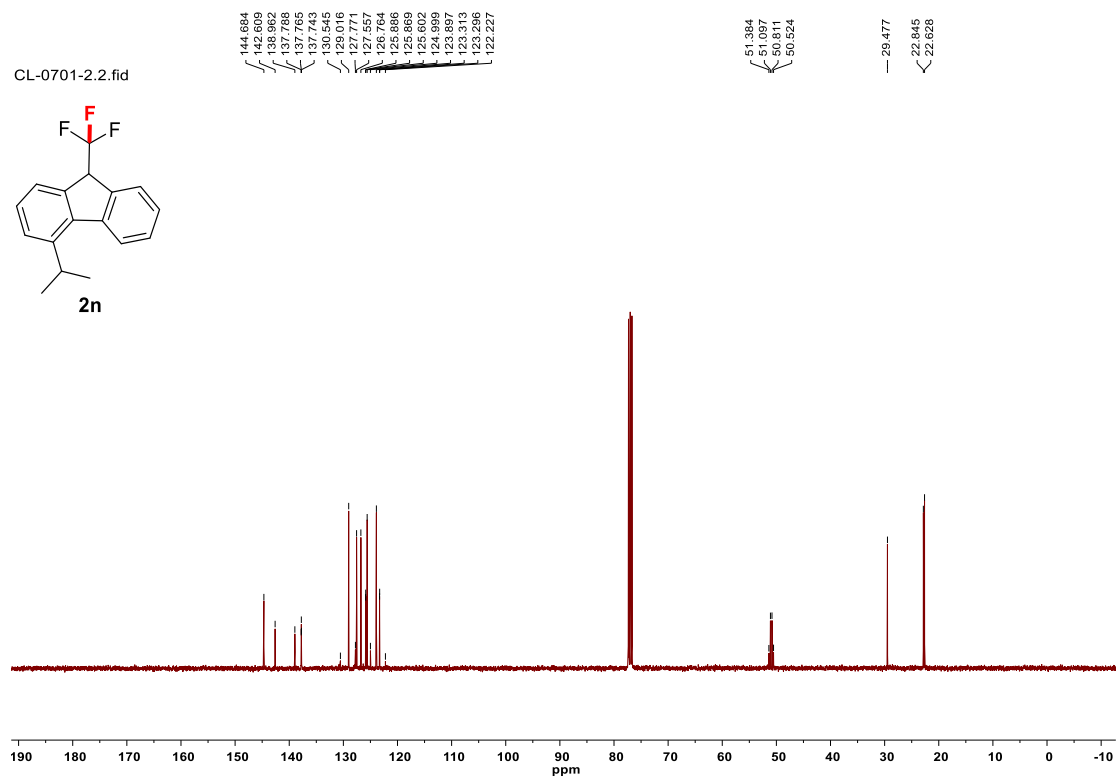

$^{13}\text{C}$  NMR spectrum of **2n** (101 MHz,  $\text{CDCl}_3$ )

CL-0701-2.1.fid

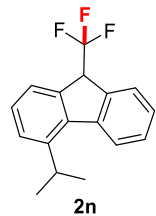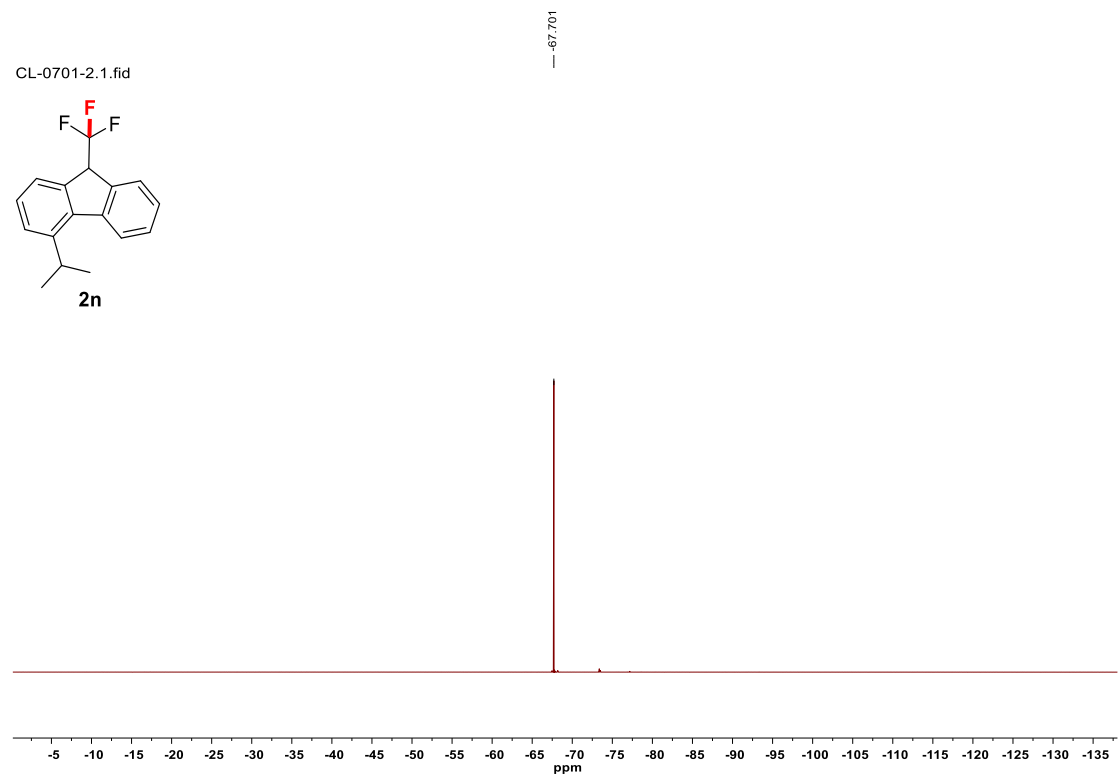

$^{19}\text{F}$  NMR spectrum of **2n** (376 MHz,  $\text{CDCl}_3$ )

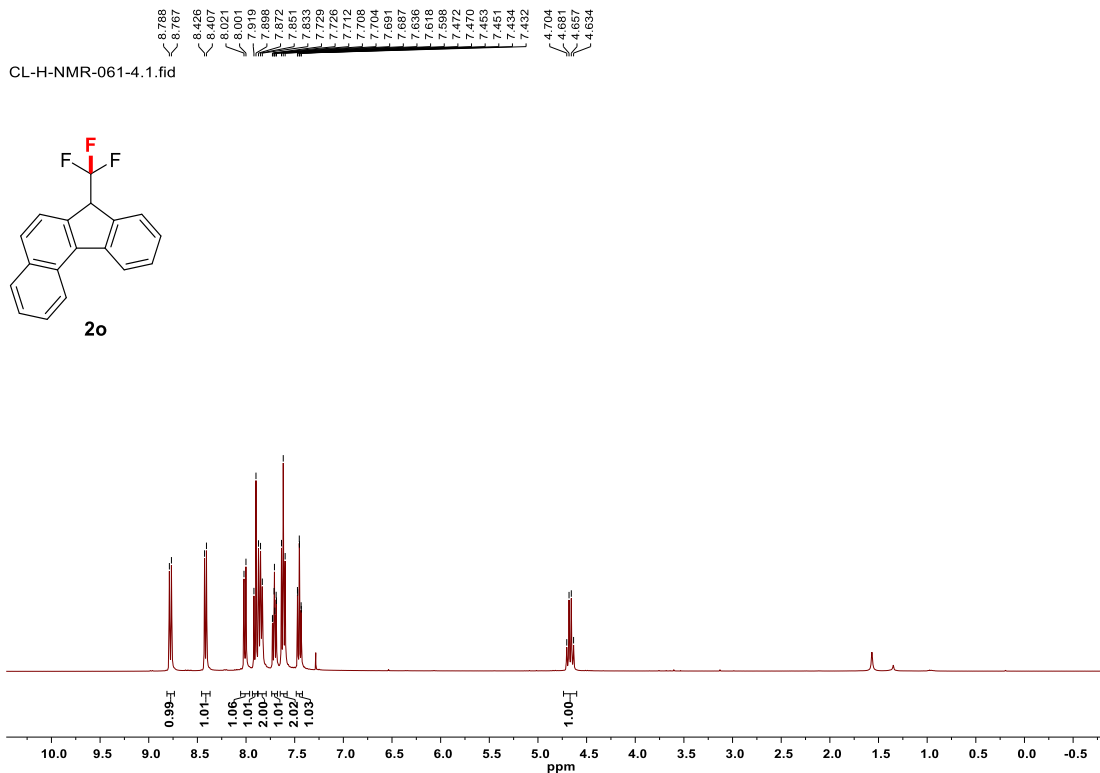

<sup>1</sup>H NMR spectrum of **2o** (400 MHz, CDCl<sub>3</sub>)

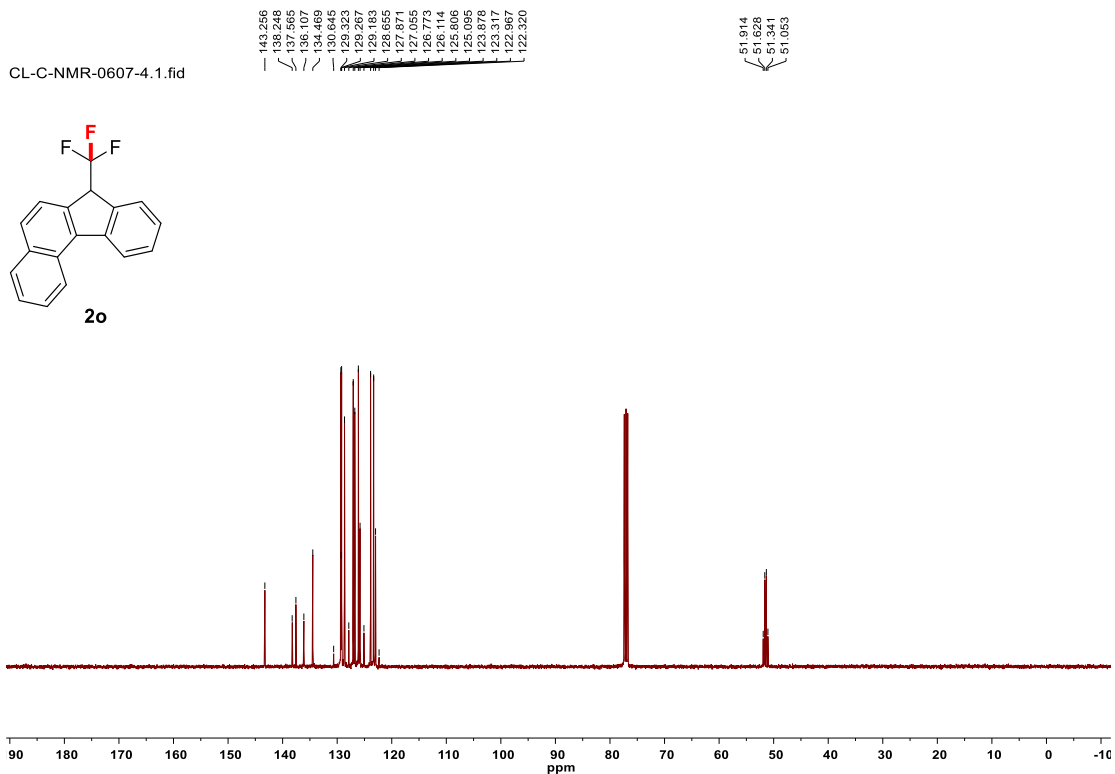

<sup>13</sup>C NMR spectrum of **2o** (101 MHz, CDCl<sub>3</sub>)

CL-C-NMR-0607-4.2.fid

— 67.029

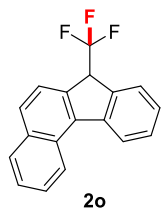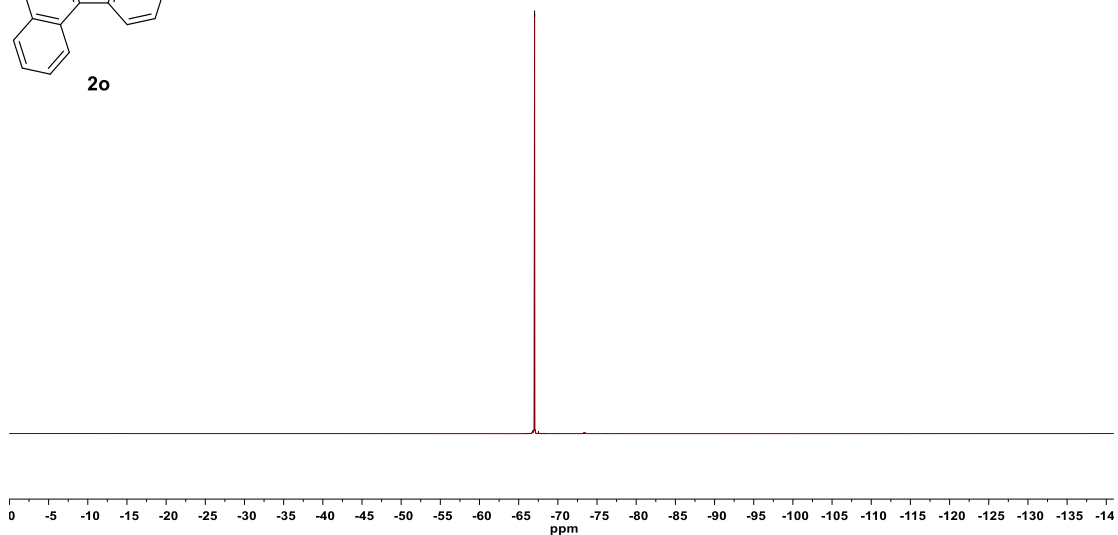

$^{19}\text{F}$  NMR spectrum of **2o** (376 MHz,  $\text{CDCl}_3$ )

CL-0629-3.1.fid

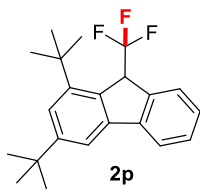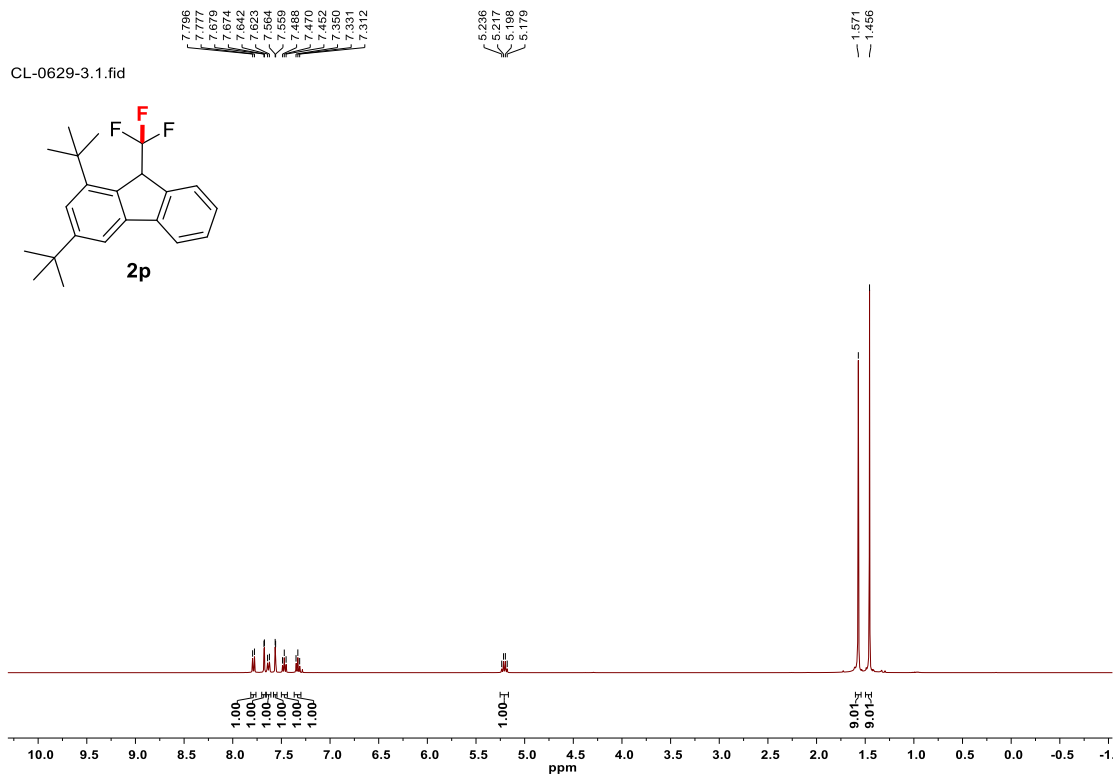

$^1\text{H}$  NMR spectrum of **2p** (400 MHz,  $\text{CDCl}_3$ )

CL-0701-3.2.fid

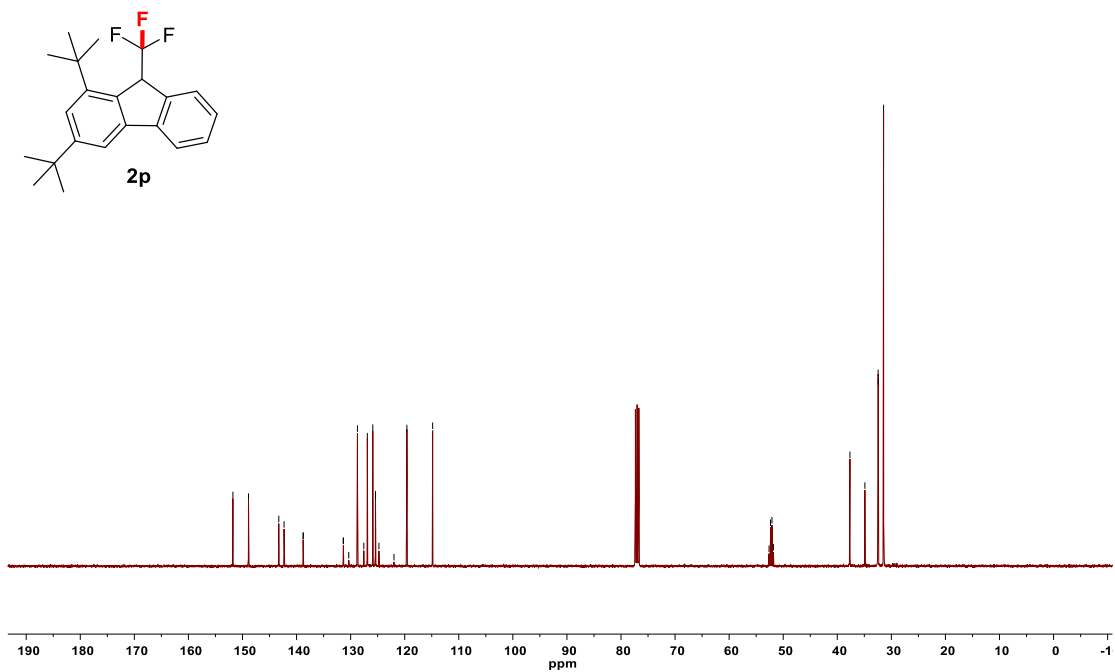

$^{13}\text{C}$  NMR spectrum of **2p** (101 MHz,  $\text{CDCl}_3$ )

CL-0701-3.1.fid

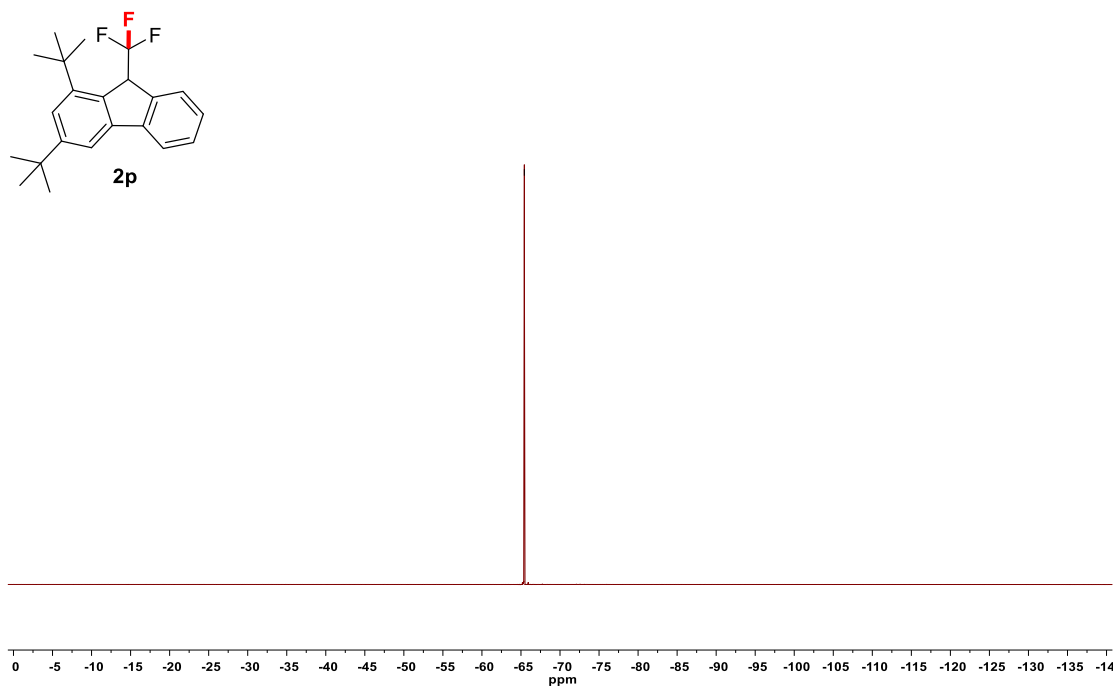

$^{19}\text{F}$  NMR spectrum of **2p** (376 MHz,  $\text{CDCl}_3$ )

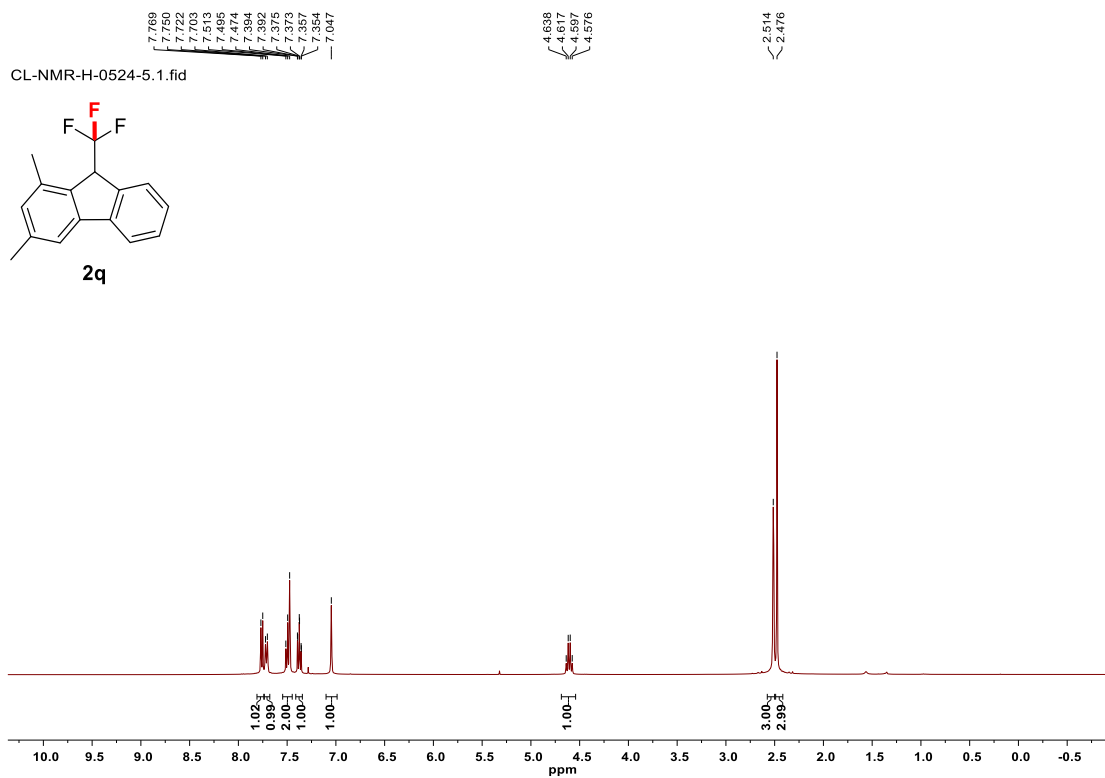

$^1\text{H}$  NMR spectrum of **2q** (400 MHz,  $\text{CDCl}_3$ )

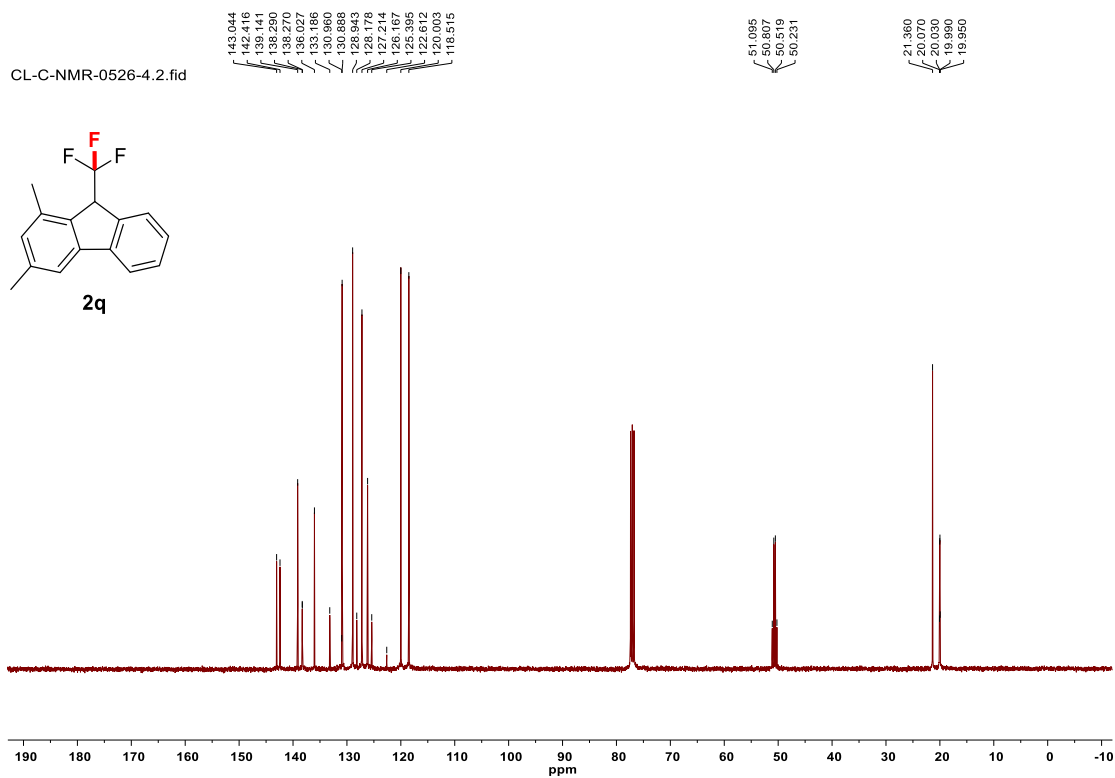

$^{13}\text{C}$  NMR spectrum of **2q** (101 MHz,  $\text{CDCl}_3$ )



CL-C-NMR-0526-4.1.fid

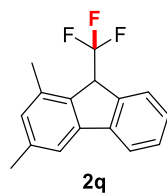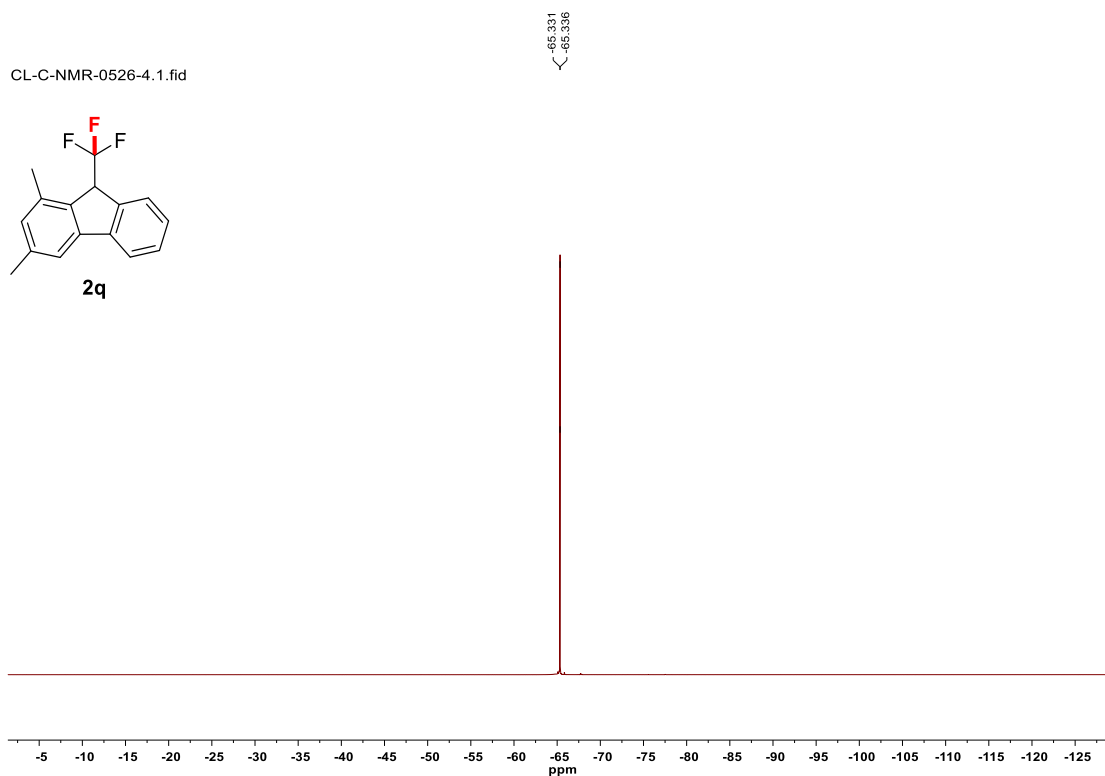

<sup>19</sup>F NMR spectrum of **2q** (376 MHz, CDCl<sub>3</sub>)

CL-H-NMR-0609-3.1.fid

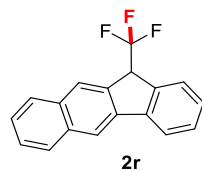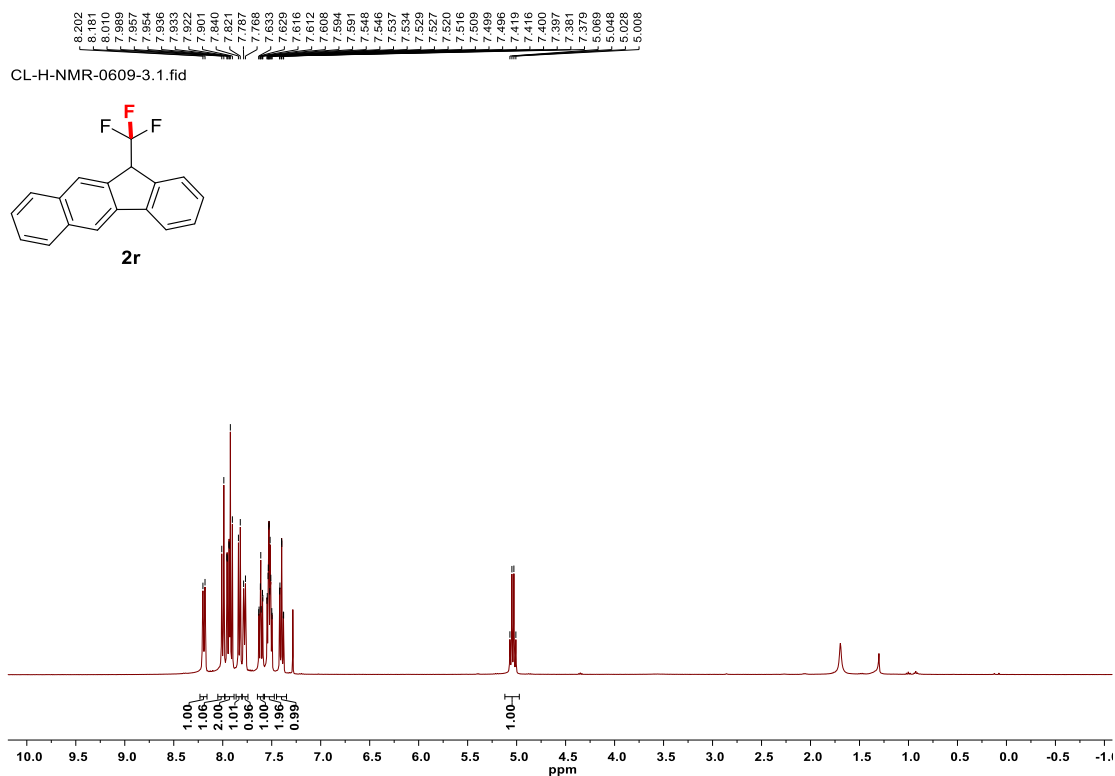

<sup>1</sup>H NMR spectrum of **2r** (400 MHz, CDCl<sub>3</sub>)

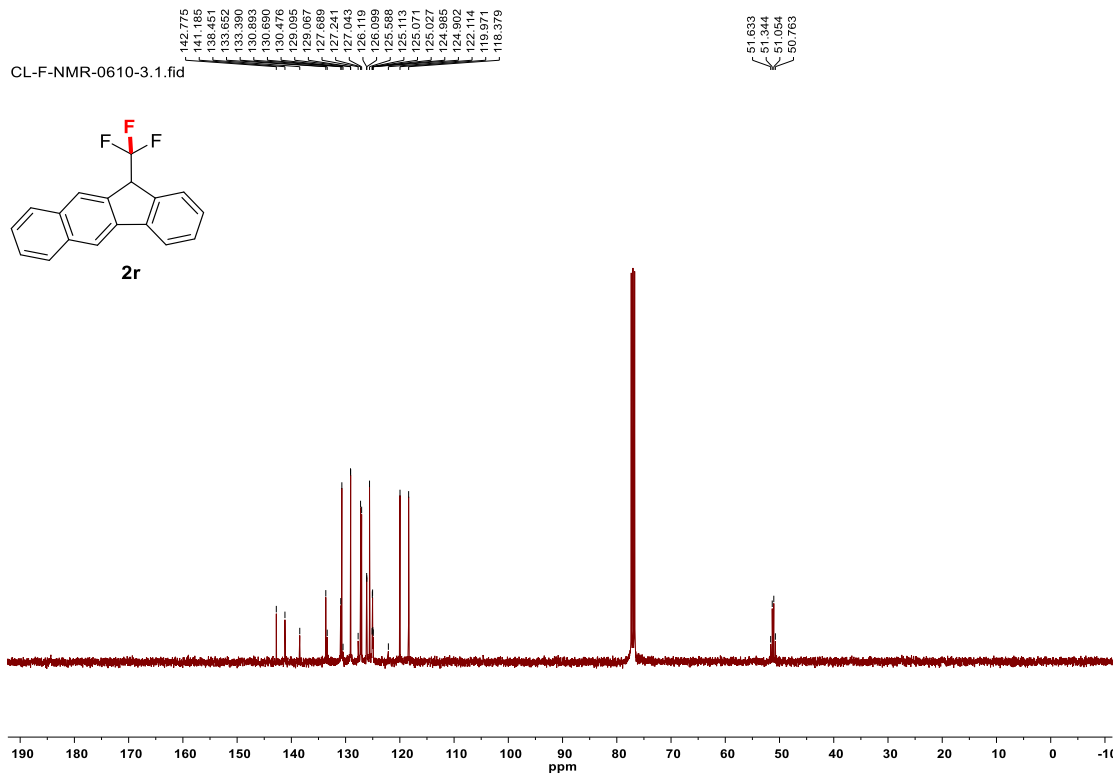

$^{13}\text{C}$  NMR spectrum of **2r** (101 MHz,  $\text{CDCl}_3$ )

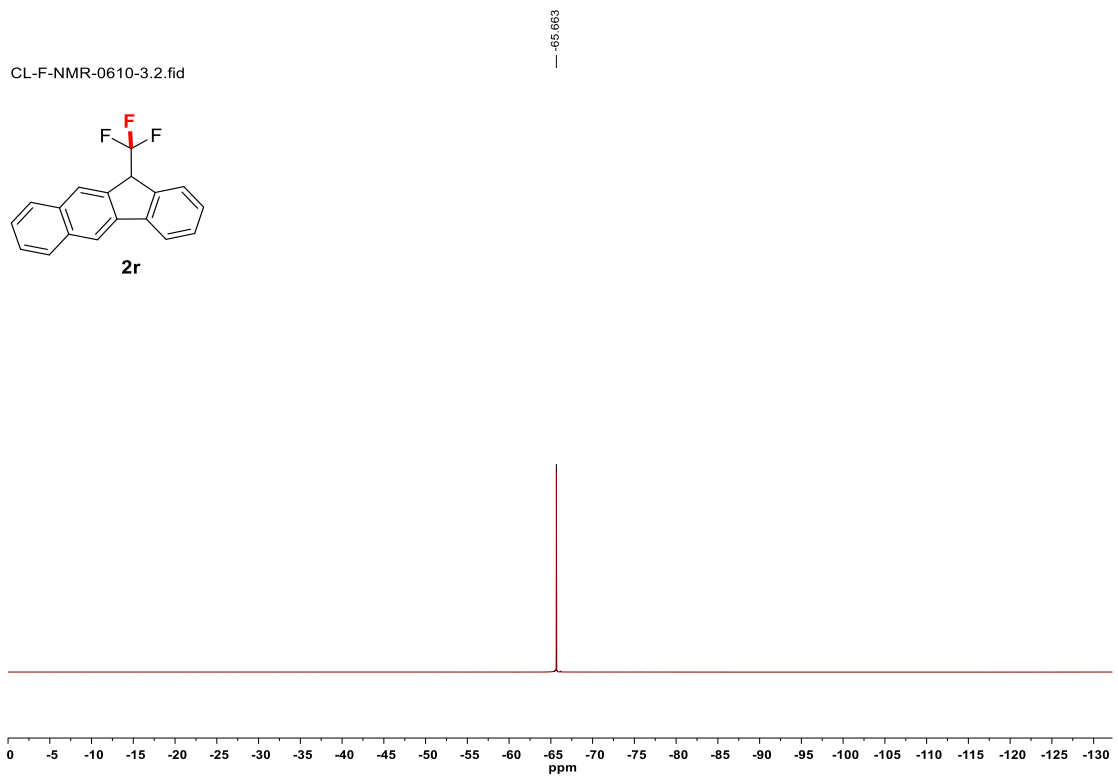

$^{19}\text{F}$  NMR spectrum of **2r** (376 MHz,  $\text{CDCl}_3$ )

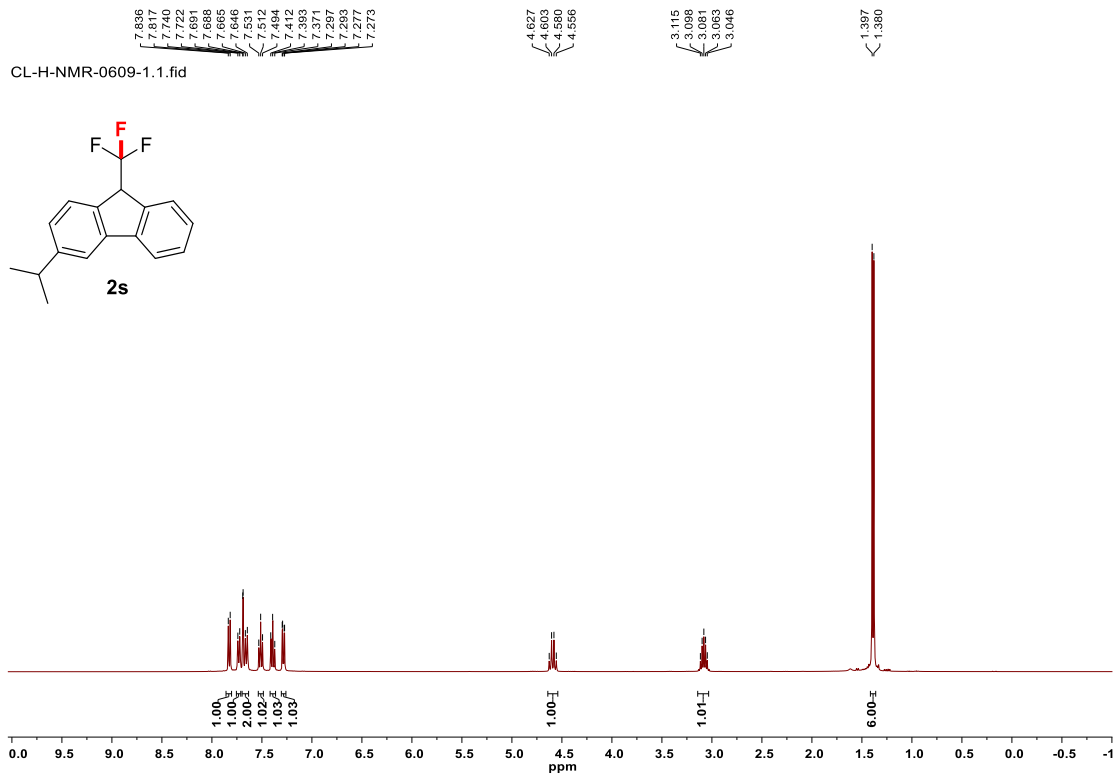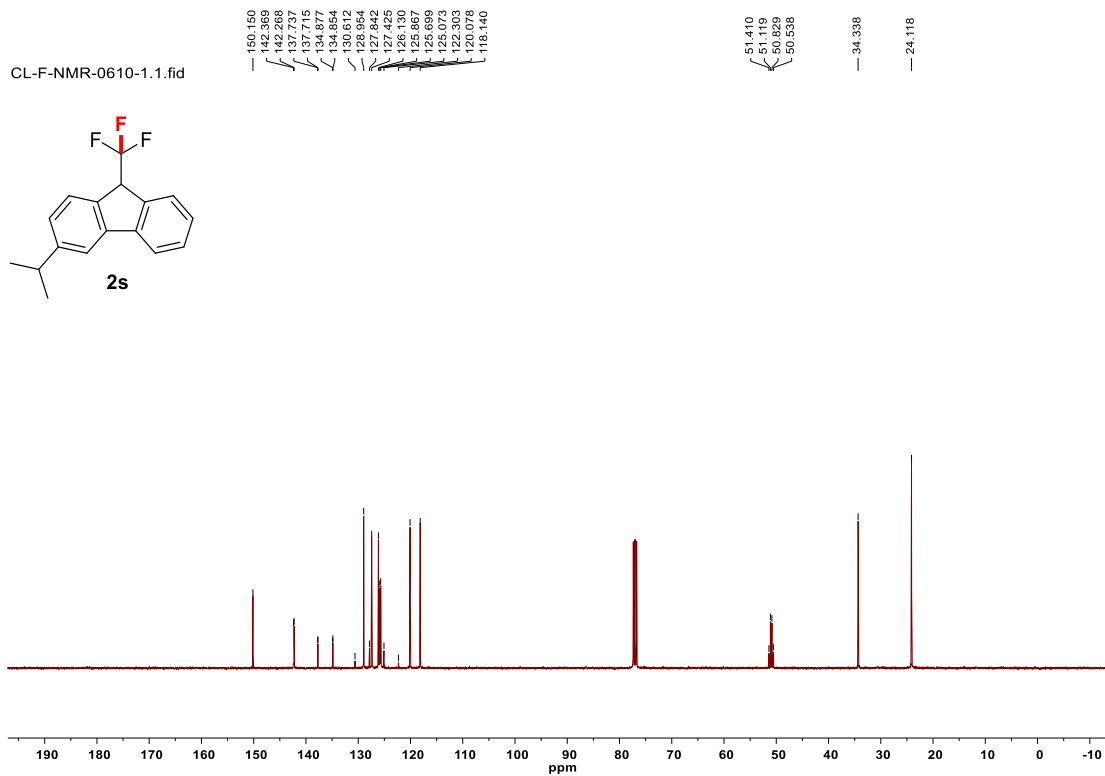

CL-F-NMR-0610-1.2.fid

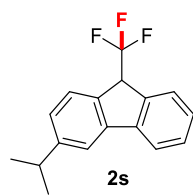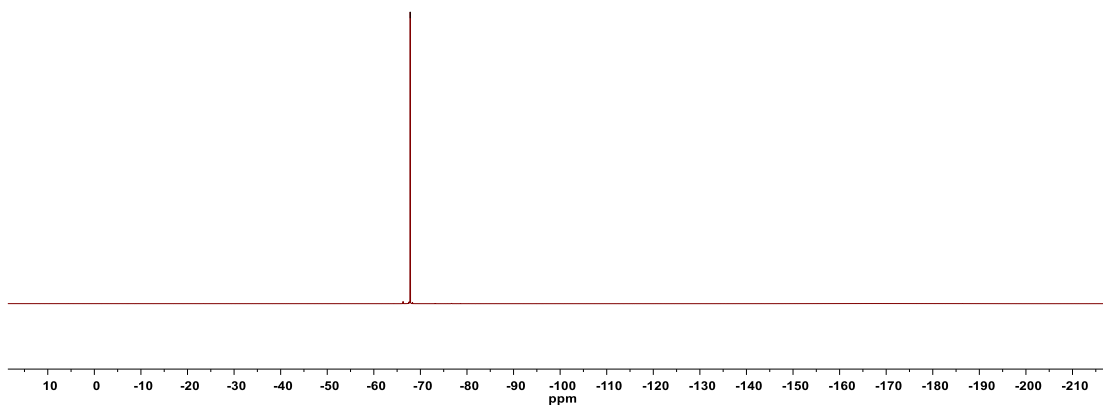

$^{19}\text{F}$  NMR spectrum of **2s** (376 MHz,  $\text{CDCl}_3$ )

CL-0629-1.1.fid

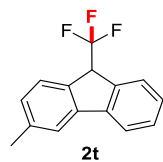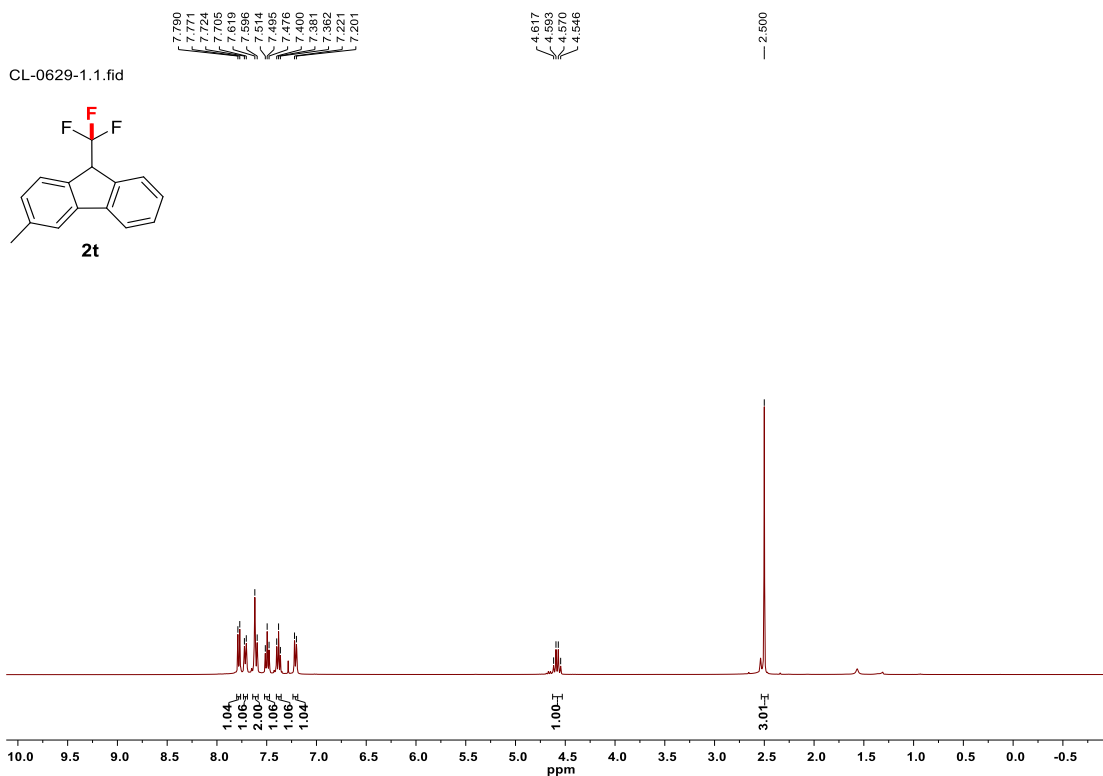

$^1\text{H}$  NMR spectrum of **2t** (400 MHz,  $\text{CDCl}_3$ )

CL-0701-1.2.fid

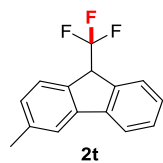

142.265  
142.227  
139.005  
137.720  
134.697  
134.472  
130.553  
128.958  
128.534  
127.783  
127.482  
126.882  
125.988  
125.564  
125.014  
122.243  
120.827  
120.052  
117.750

51.399  
51.108  
50.817  
50.525

21.553

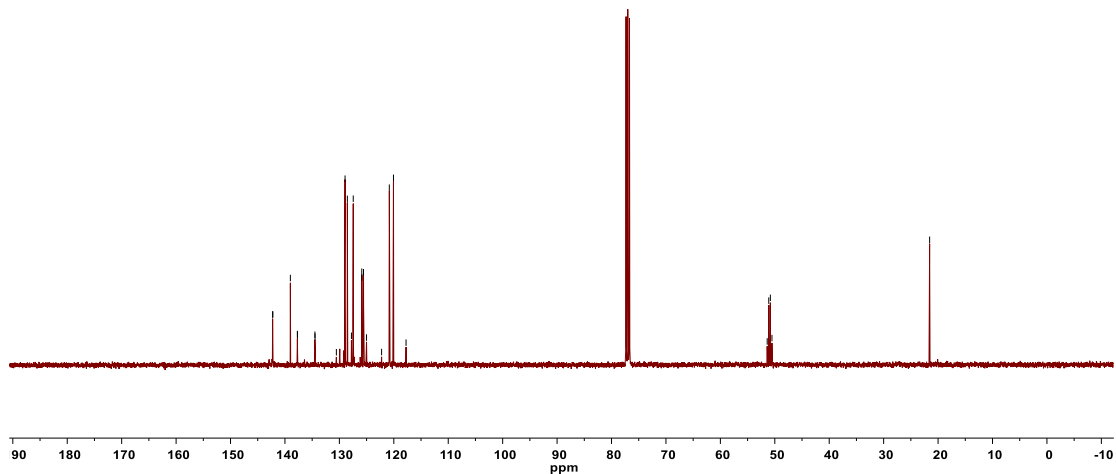

CL-0701-1.1.fid

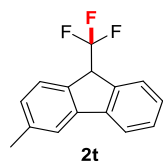

-67.936

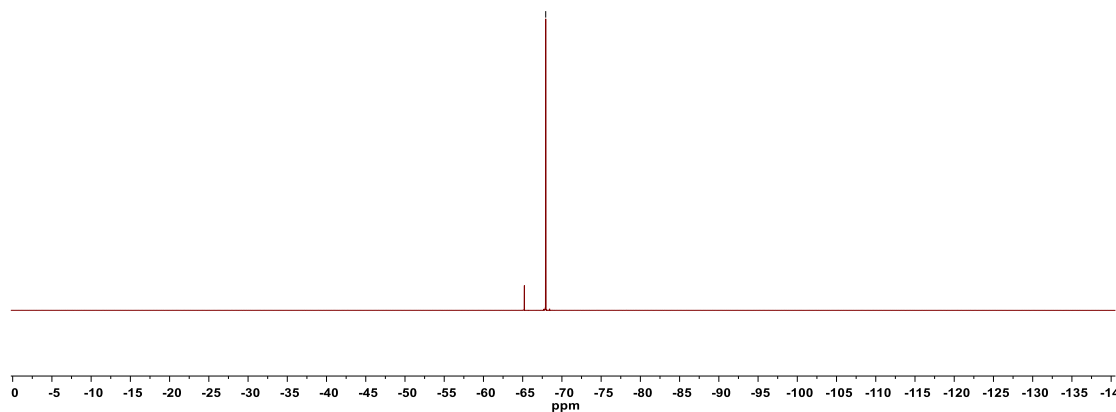

$^{19}\text{F}$  NMR spectrum of **2t** (376 MHz,  $\text{CDCl}_3$ )

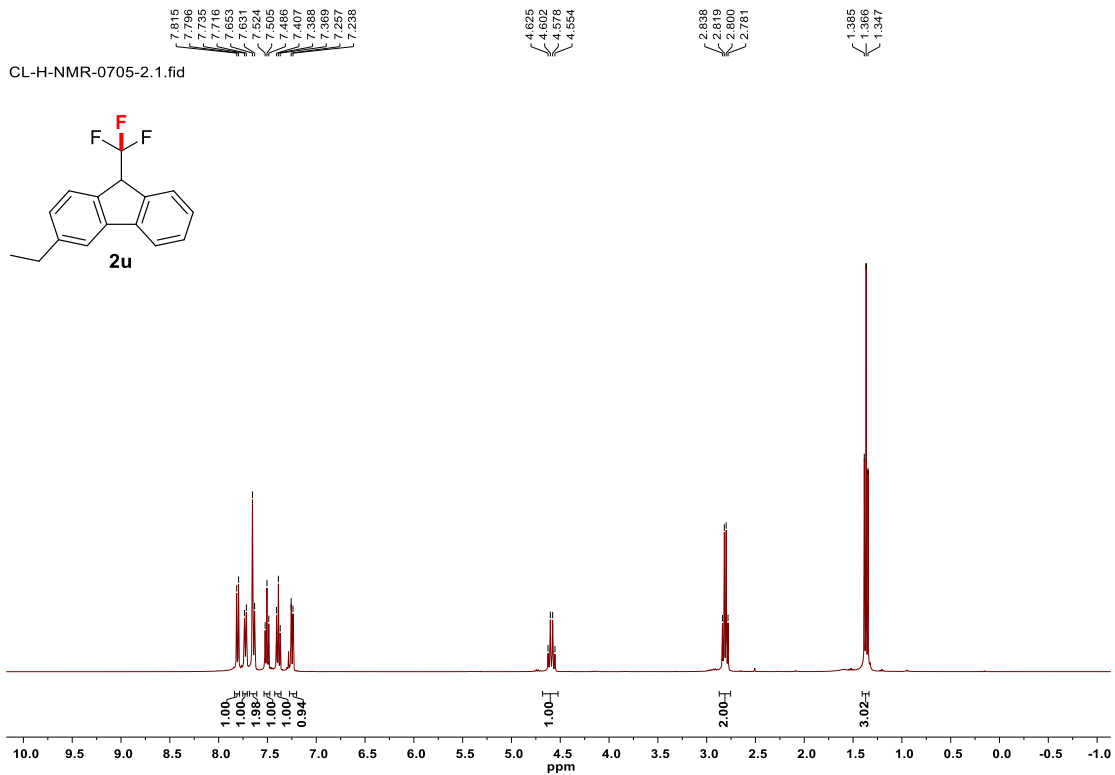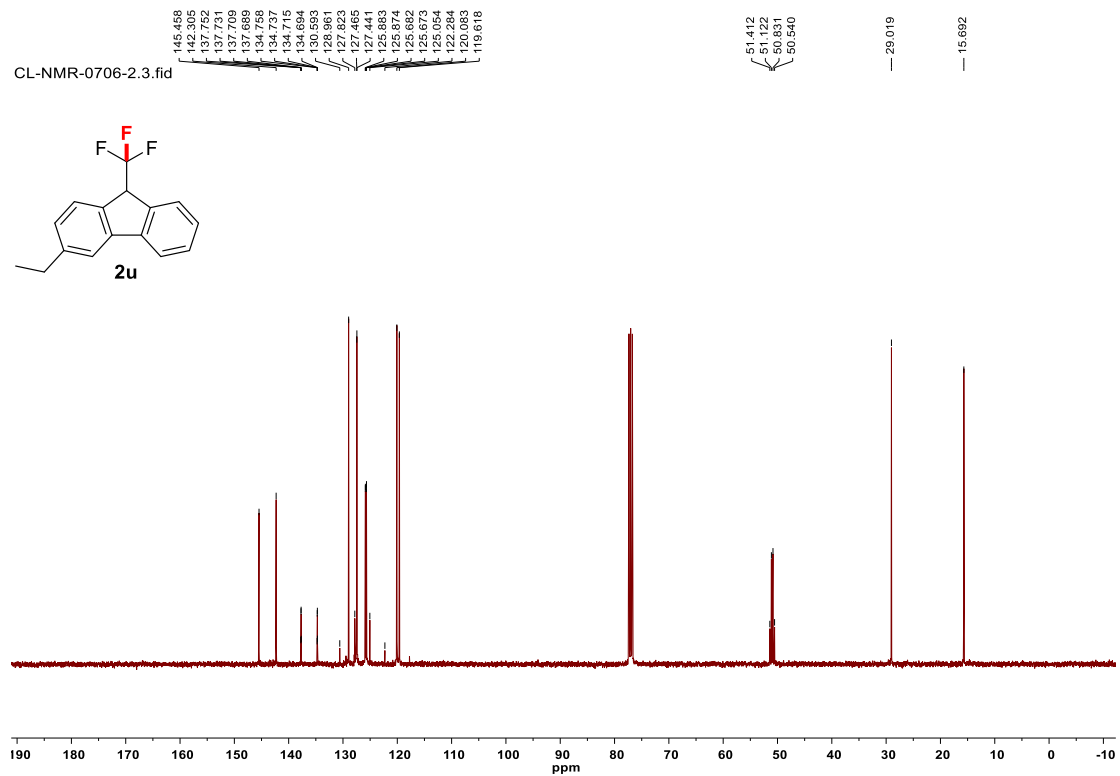

CL-NMR-0706-2.2.fid

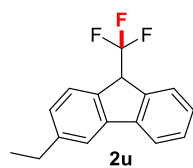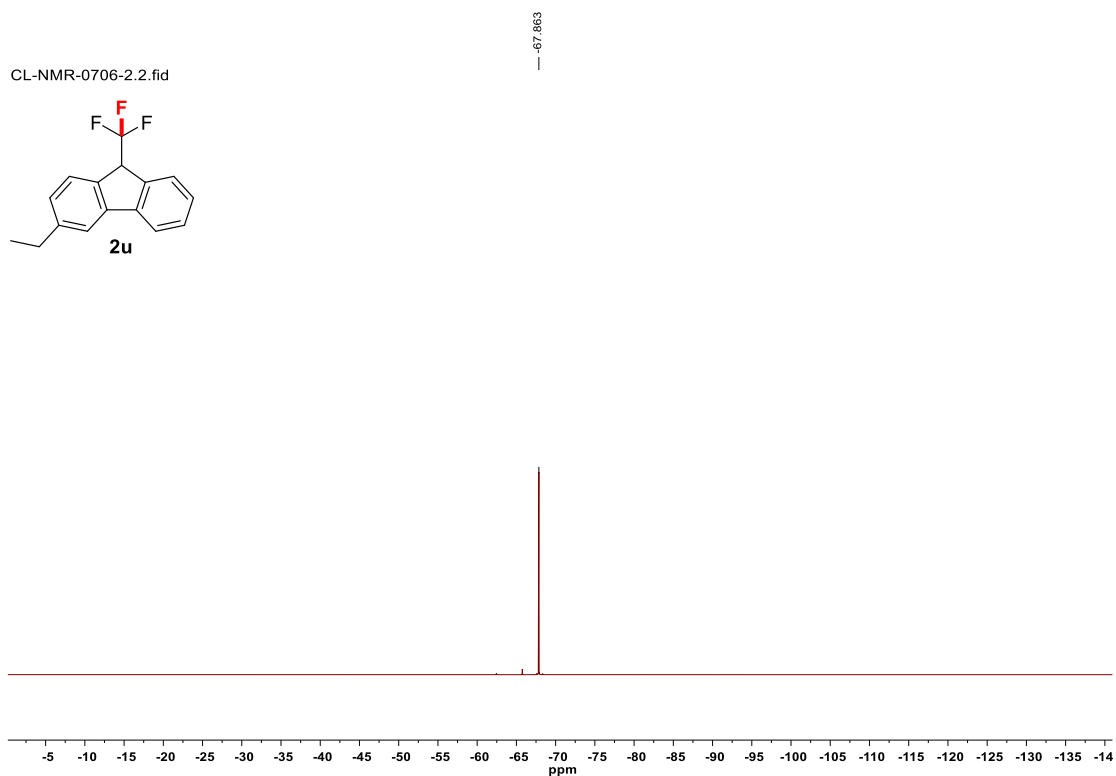

<sup>19</sup>F NMR spectrum of **2u** (376 MHz, CDCl<sub>3</sub>)

CL-0629-6.1.fid

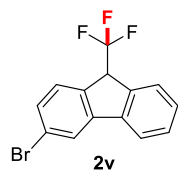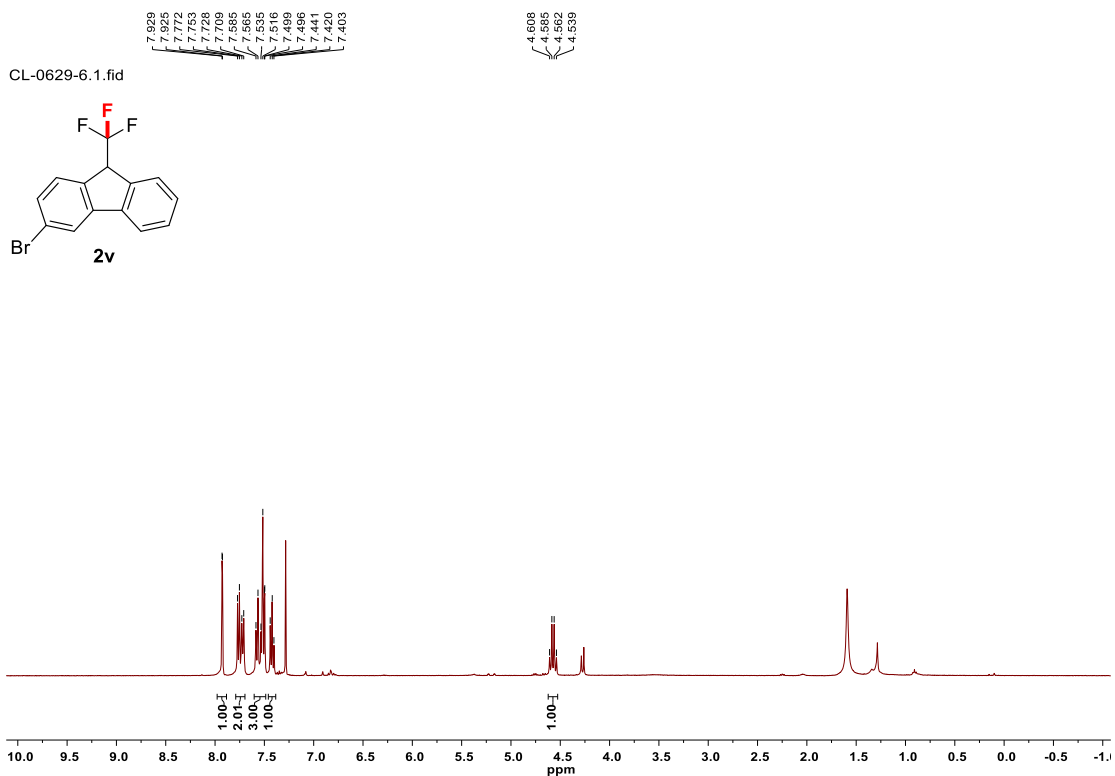

<sup>1</sup>H NMR spectrum of **2v** (400 MHz, CDCl<sub>3</sub>)

CL-0701-6.2.fid

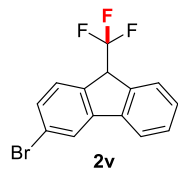

144.263  
140.874  
137.990  
136.700  
136.033  
130.468  
129.266  
128.365  
127.767  
127.267  
125.985  
125.985  
123.571  
123.478  
120.472

51.461  
50.872  
50.872  
50.577

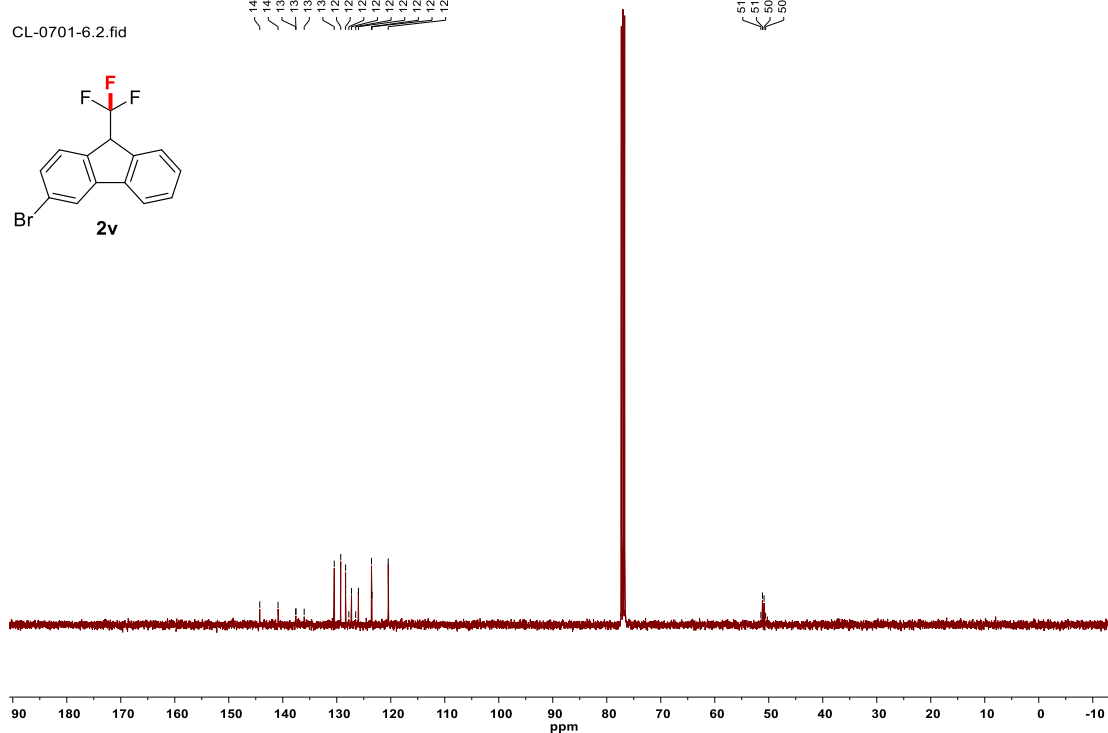

<sup>13</sup>C NMR spectrum of **2v** (101 MHz, CDCl<sub>3</sub>)

CL-0701-6.1.fid

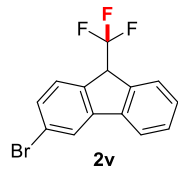

-67.828

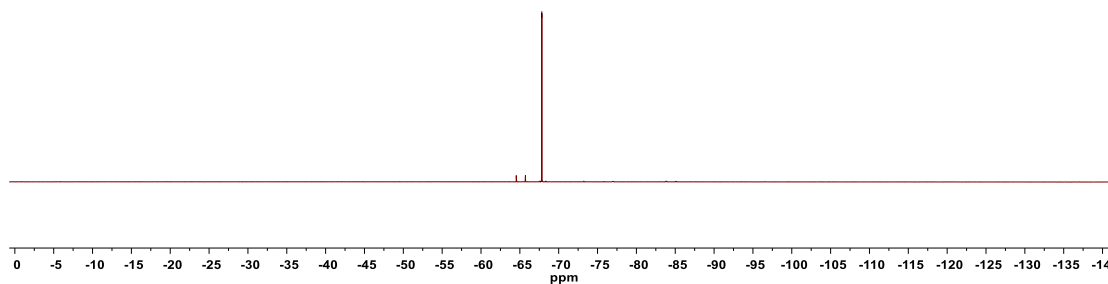

<sup>19</sup>F NMR spectrum of **2v** (376 MHz, CDCl<sub>3</sub>)



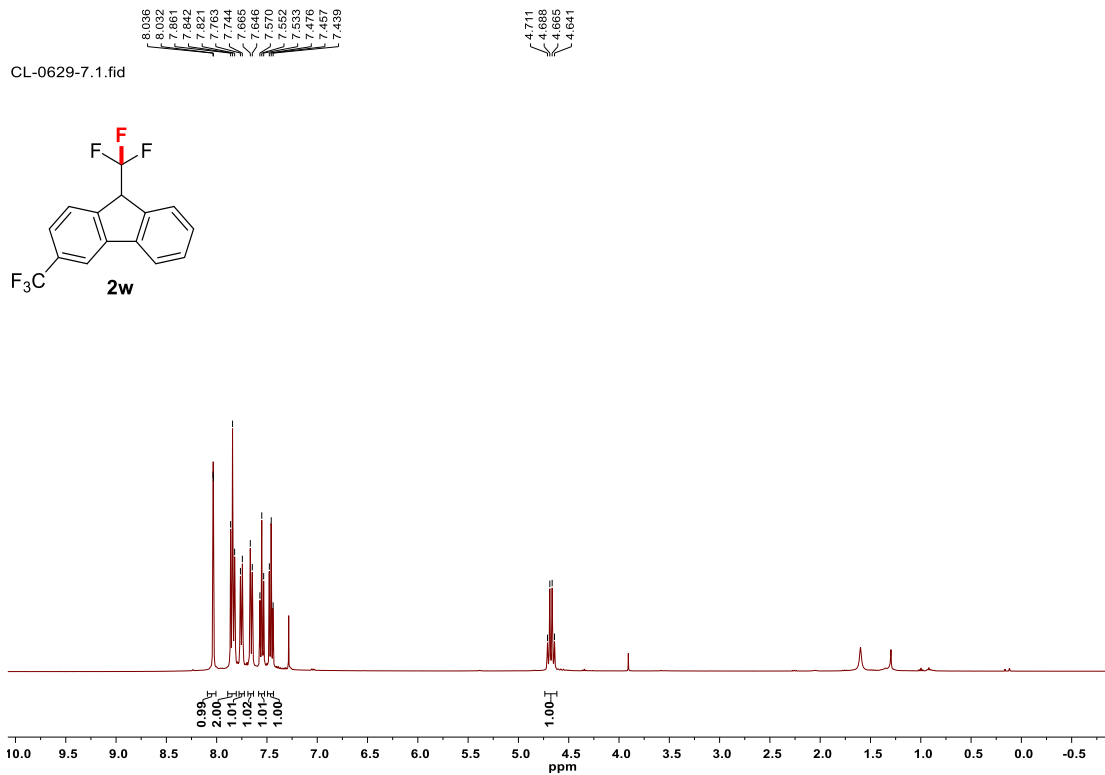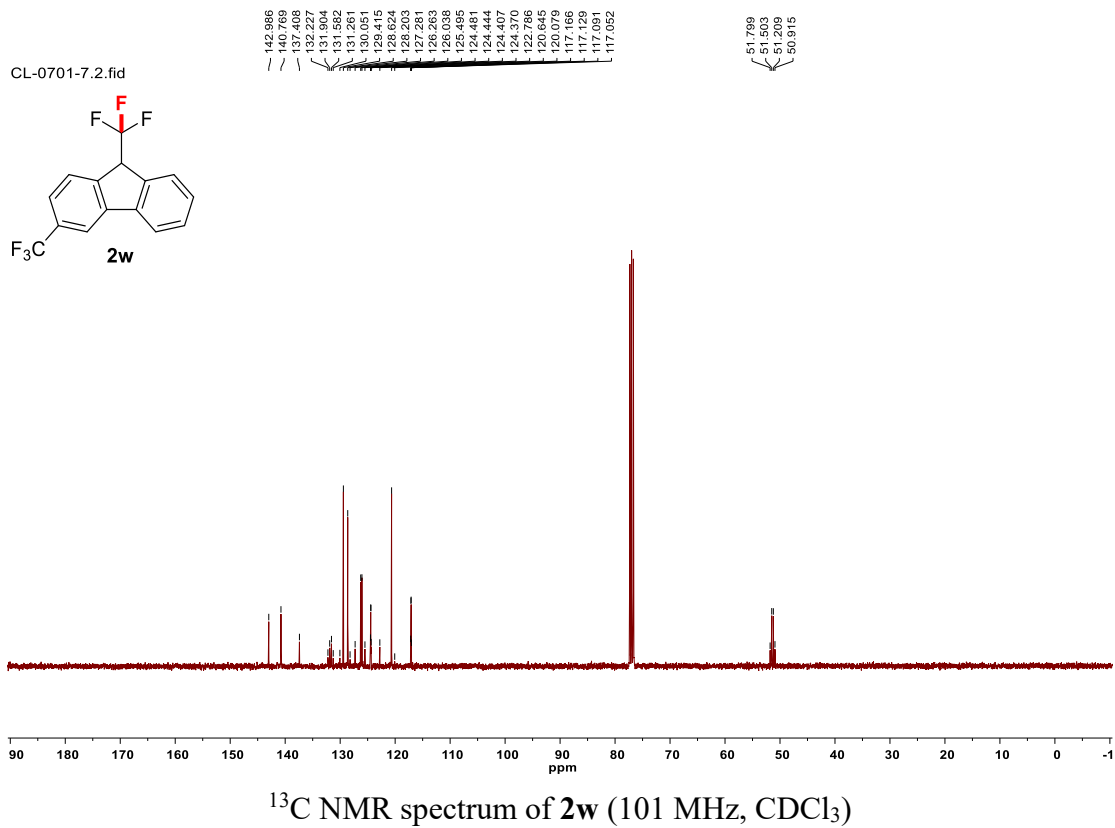

CL-0701-7.1.fid

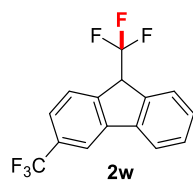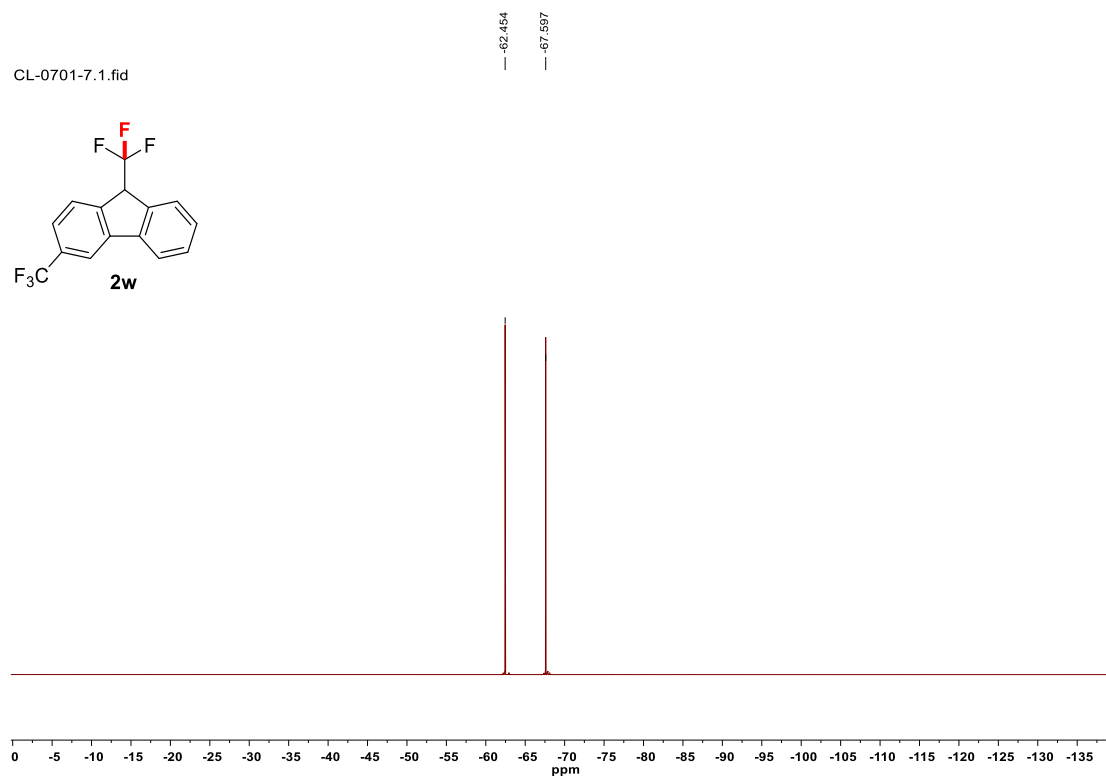

$^{19}\text{F}$  NMR spectrum of **2w** (376 MHz,  $\text{CDCl}_3$ )

CL-H-NMR-0609-2.1.fid

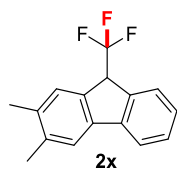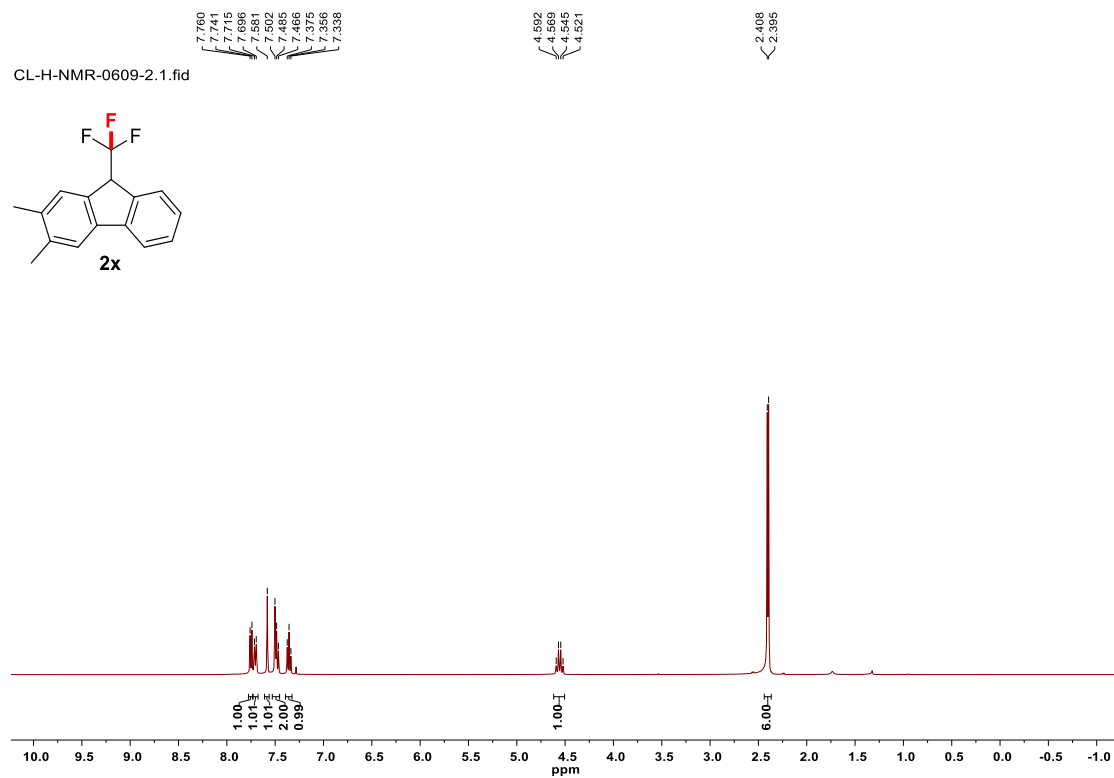

$^1\text{H}$  NMR spectrum of **2x** (400 MHz,  $\text{CDCl}_3$ )

CL-F-NMR-0610-2.1.fid

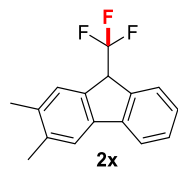

142.448  
139.984  
137.597  
137.429  
136.364  
135.028  
130.848  
128.926  
127.878  
126.881  
126.894  
125.835  
125.100  
122.340  
121.293  
119.773

51.368  
51.188  
50.820  
50.530

20.175  
20.117

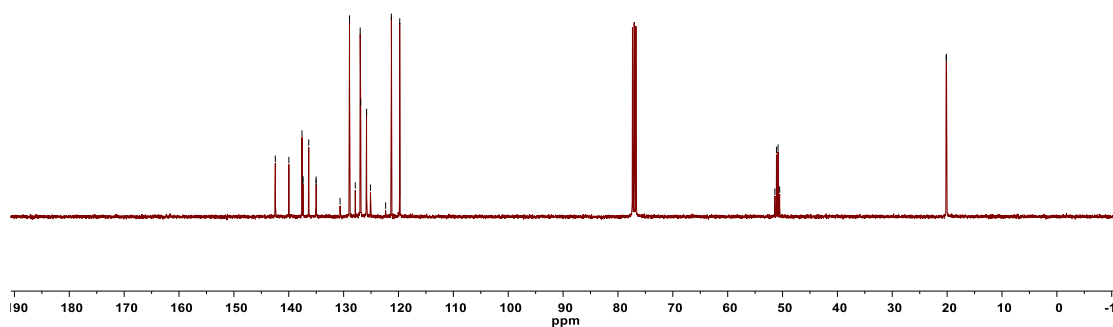

$^{13}\text{C}$  NMR spectrum of **2x** (101 MHz,  $\text{CDCl}_3$ )

CL-F-NMR-0610-2.2.fid

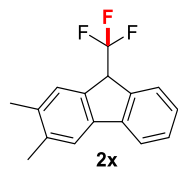

-67.865

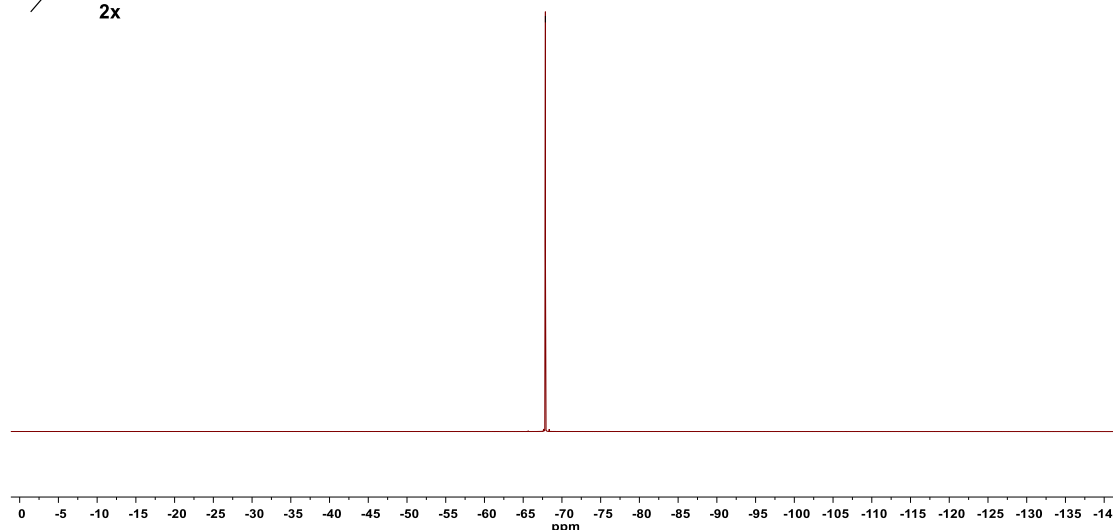

$^{19}\text{F}$  NMR spectrum of **2x** (376 MHz,  $\text{CDCl}_3$ )

CL-H-NMR-0609-6.1.fid

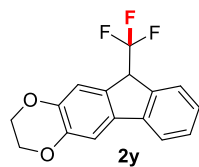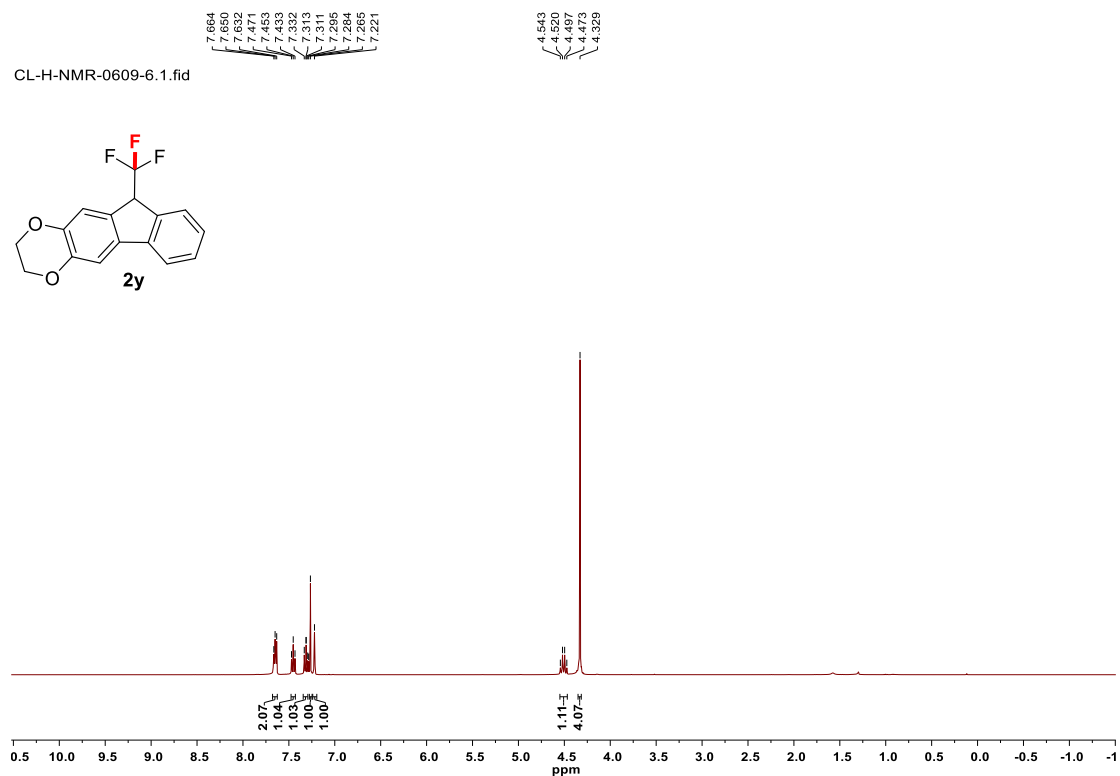

<sup>1</sup>H NMR spectrum of **2y** (400 MHz, CDCl<sub>3</sub>)

CL-F-NMR-0610-5.1.fid

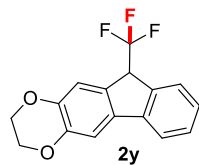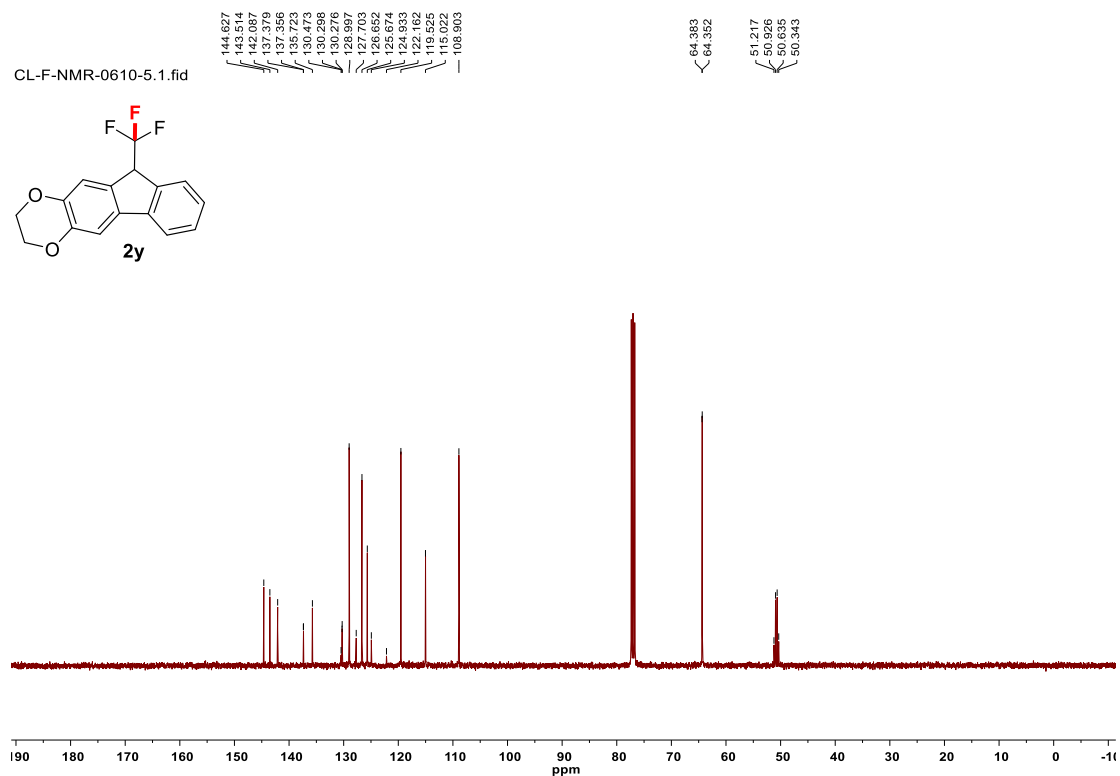

<sup>13</sup>C NMR spectrum of **2y** (101 MHz, CDCl<sub>3</sub>)

CL-F-NMR-0610-5.2.fid

--68.229

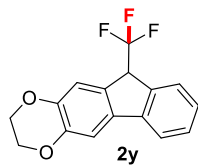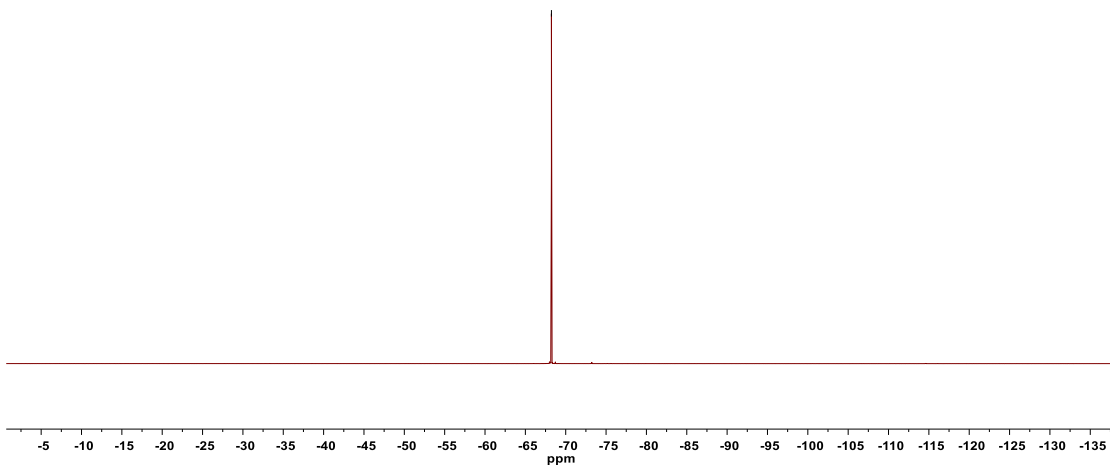

$^{19}\text{F}$  NMR spectrum of **2y** (376 MHz,  $\text{CDCl}_3$ )

CL-03 7-03.1.fid

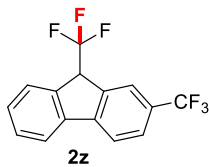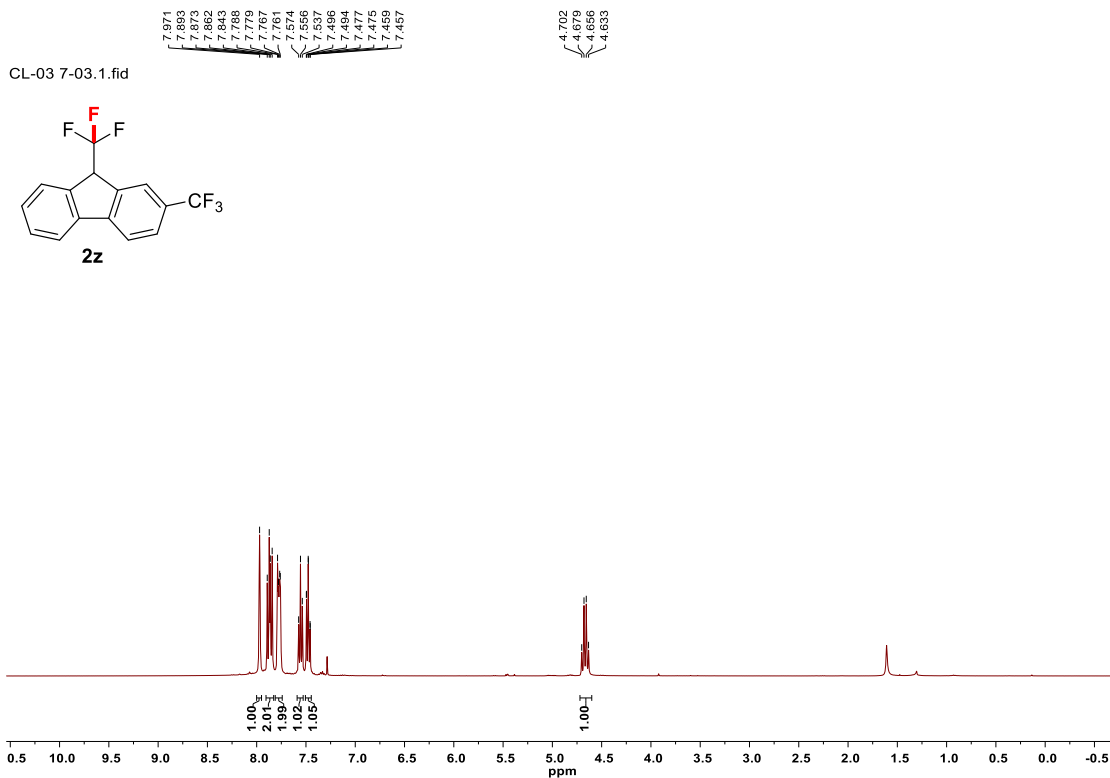

$^1\text{H}$  NMR spectrum of **2z** (400 MHz,  $\text{CDCl}_3$ )

CL-03 7-03.3.fid

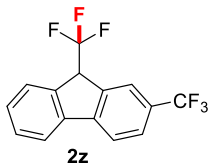

145.593  
140.652  
137.851  
137.831  
137.713  
137.691  
137.668  
137.646  
130.146  
129.924  
129.502  
129.427  
129.180  
128.902  
128.879  
126.564  
126.526  
126.488  
126.449  
126.095  
126.080  
125.524  
122.928  
122.925  
122.903  
122.891  
122.864  
120.994  
120.403

51.709  
51.414  
51.119  
50.824

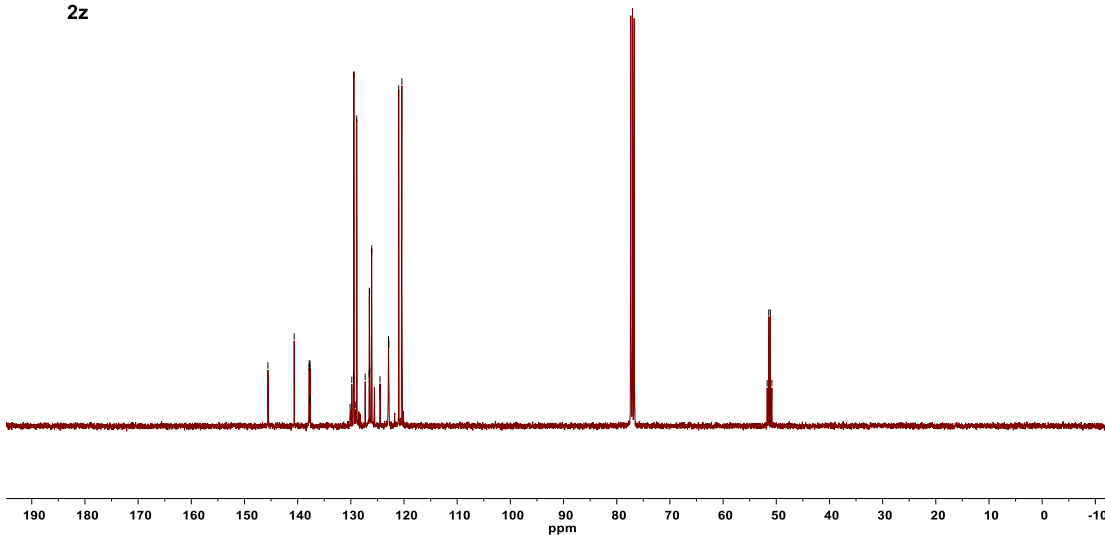

$^{13}\text{C}$  NMR spectrum of **2z** (101 MHz,  $\text{CDCl}_3$ )

CL-03 7-03.2.fid

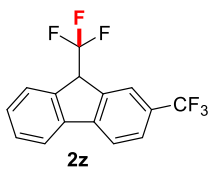

-61.981  
-67.657  
-67.662

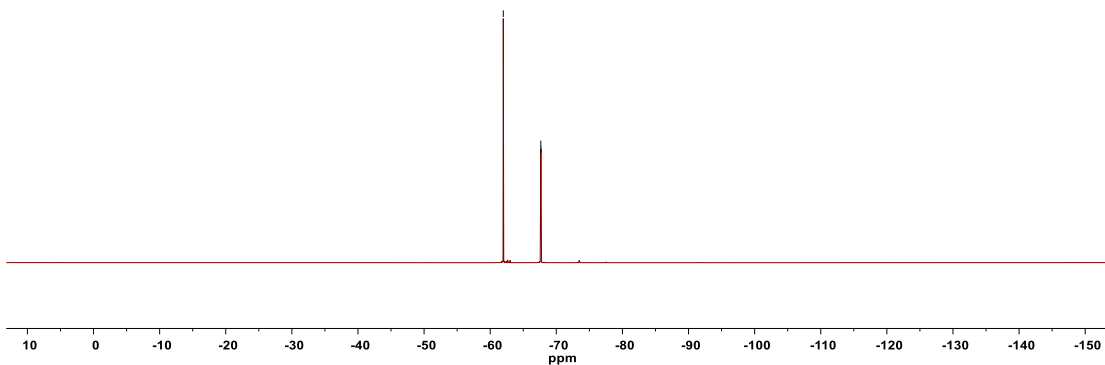

$^{19}\text{F}$  NMR spectrum of **2z** (376 MHz,  $\text{CDCl}_3$ )

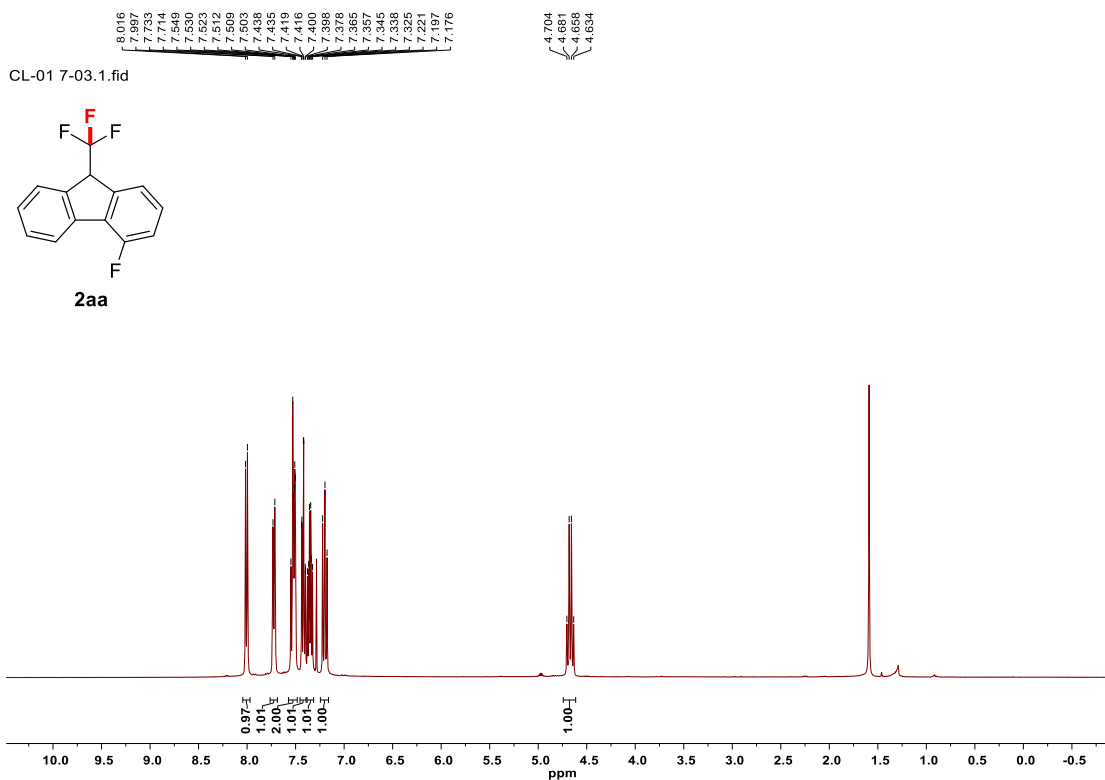

$^1\text{H}$  NMR spectrum of **2aa** (400 MHz,  $\text{CDCl}_3$ )

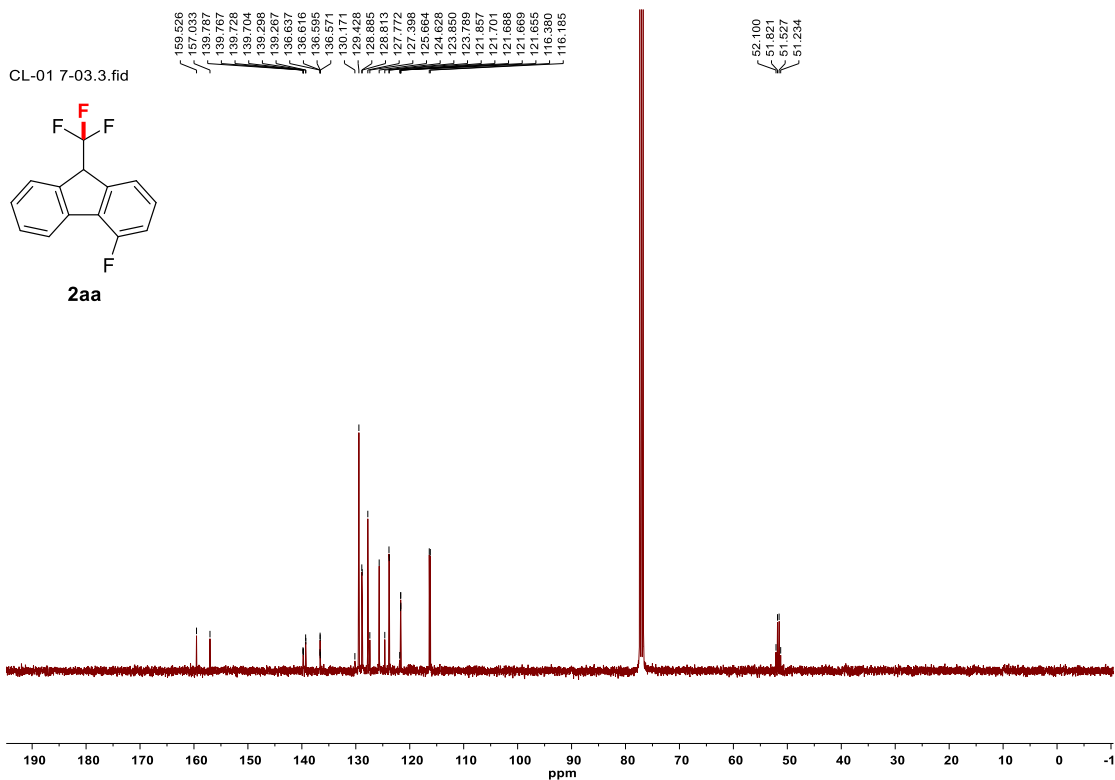

$^{13}\text{C}$  NMR spectrum of **2aa** (101 MHz,  $\text{CDCl}_3$ )

CL-01 7-03.2.fid

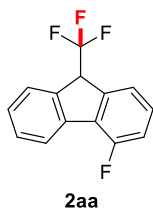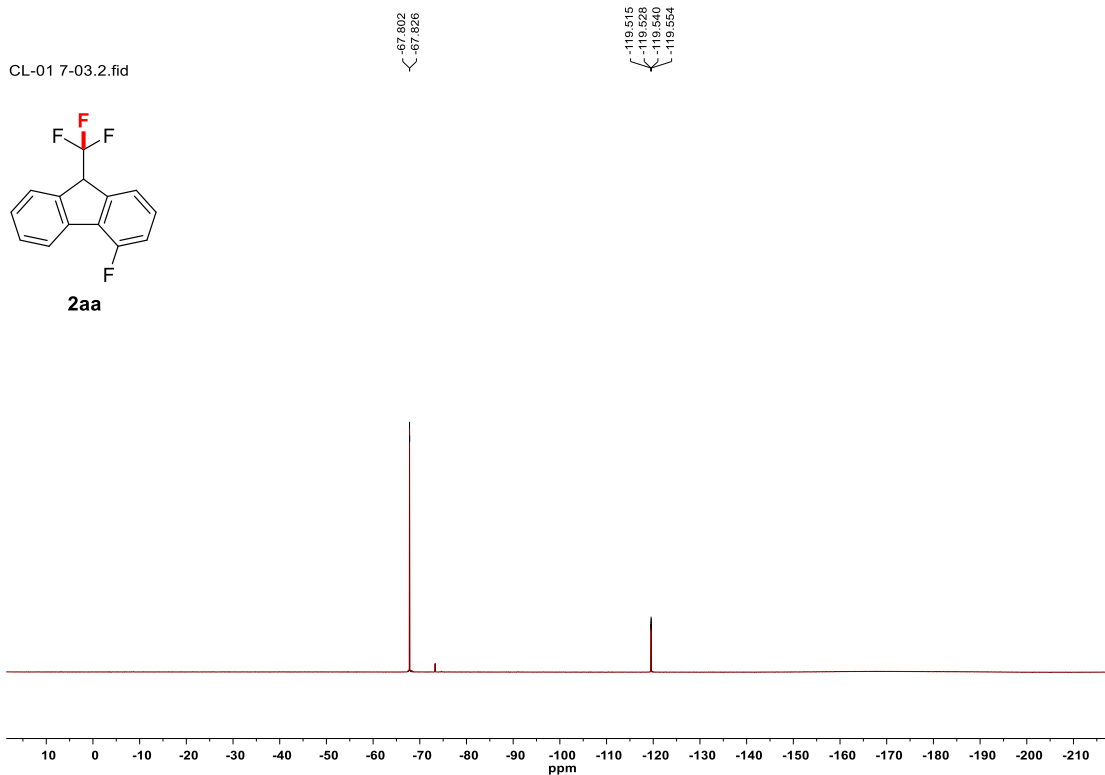

$^{19}\text{F}$  NMR spectrum of **2aa** (376 MHz,  $\text{CDCl}_3$ )

CL-H-NMR-0705-1.1.fid

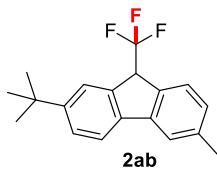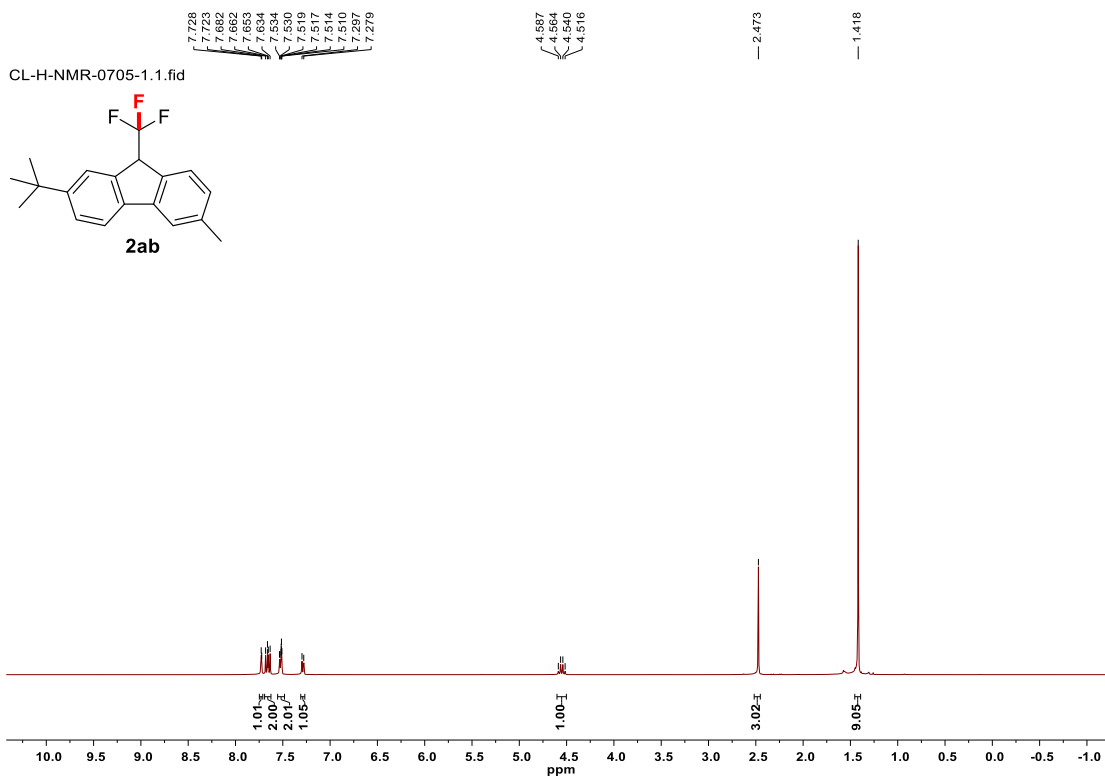

$^1\text{H}$  NMR spectrum of **2ab** (400 MHz,  $\text{CDCl}_3$ )



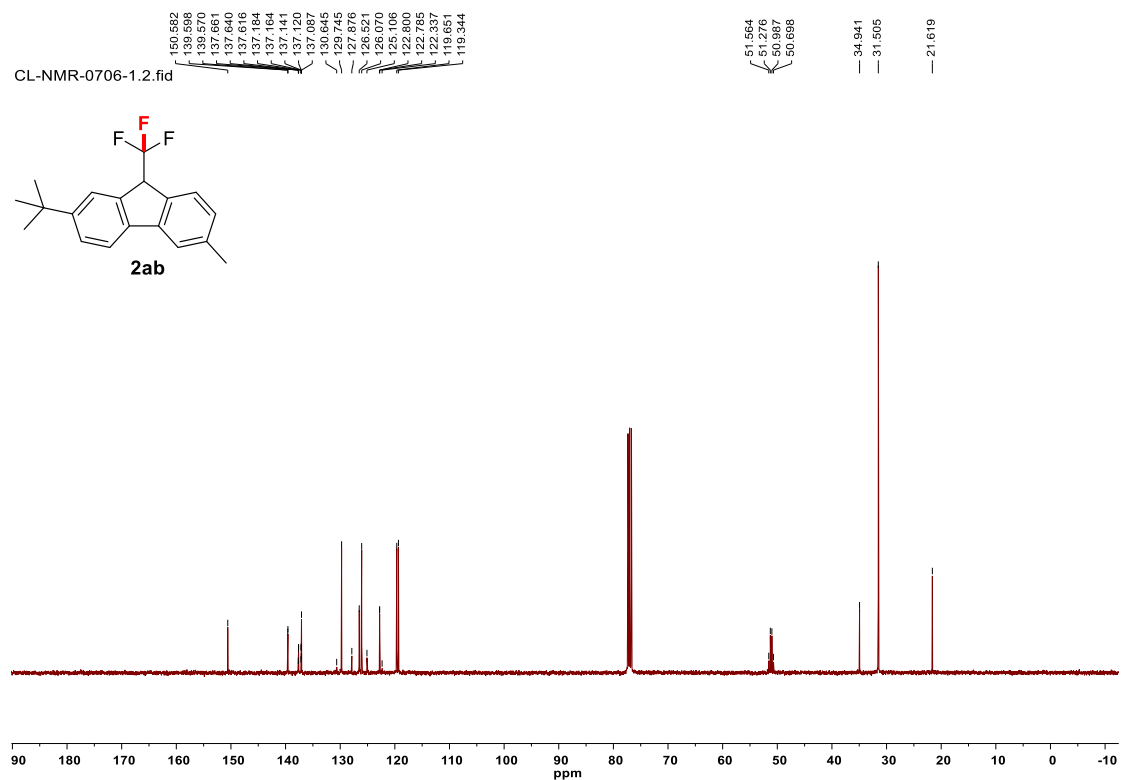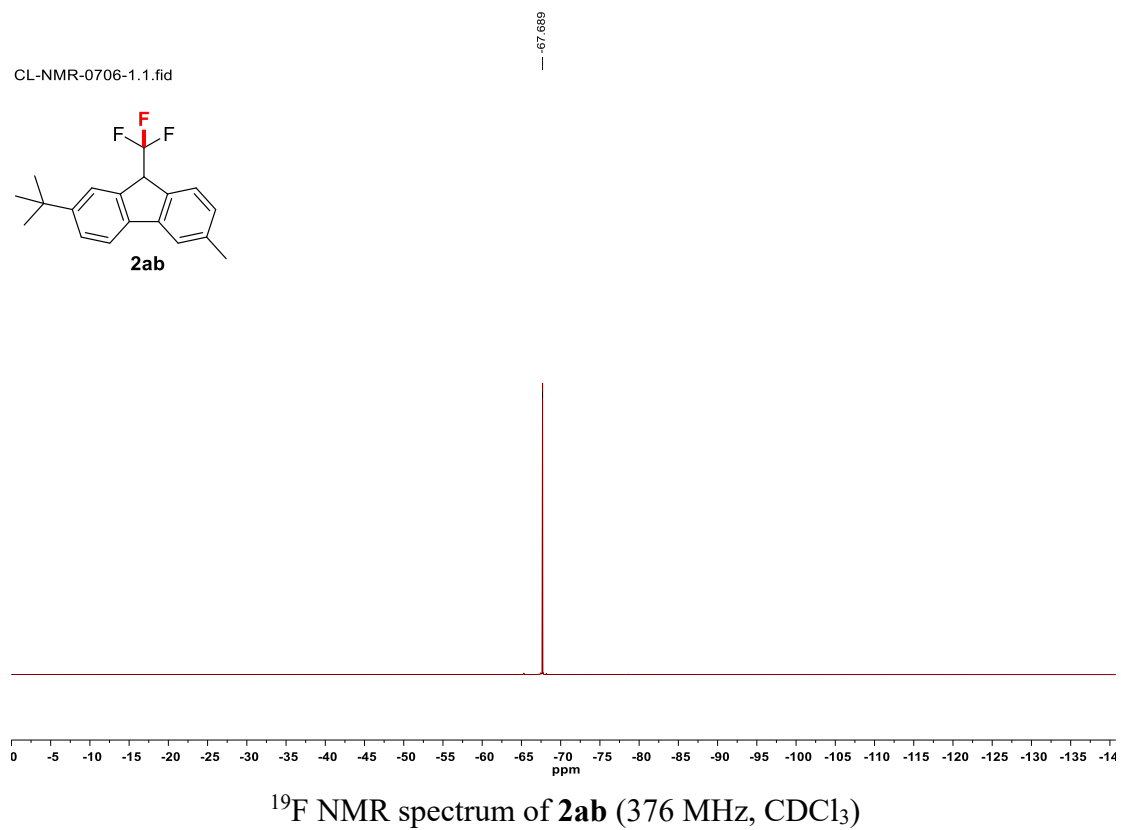

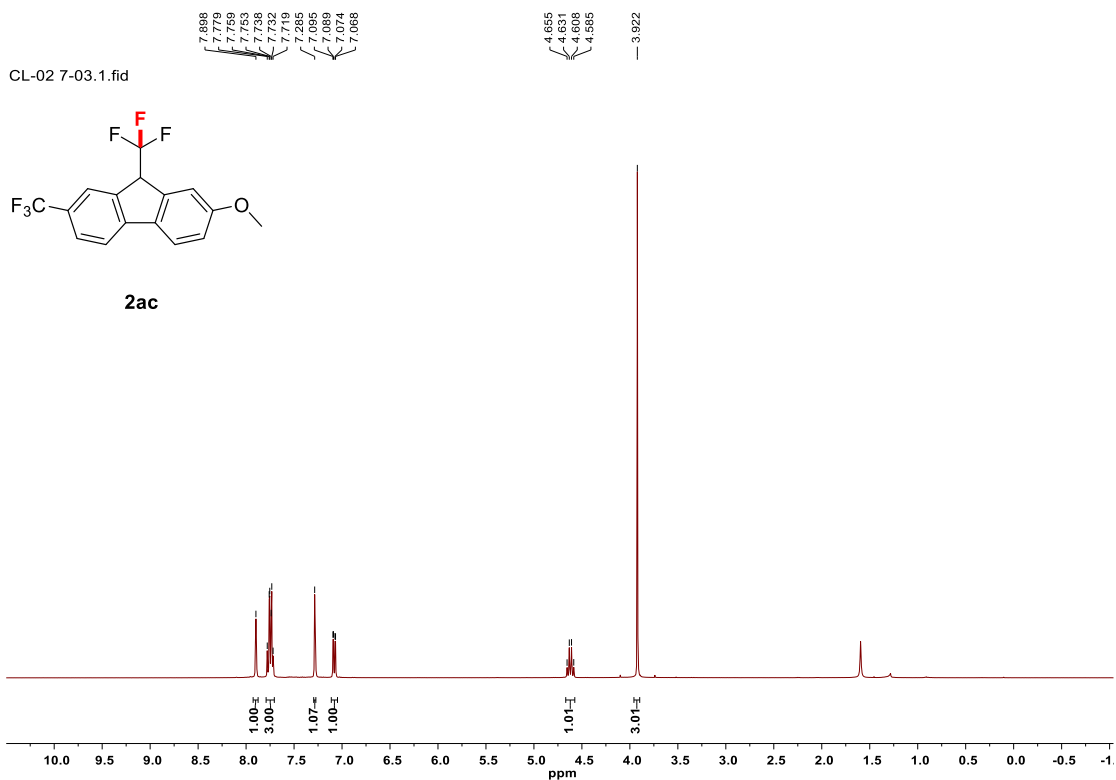

$^1\text{H}$  NMR spectrum of **2ac** (400 MHz,  $\text{CDCl}_3$ )

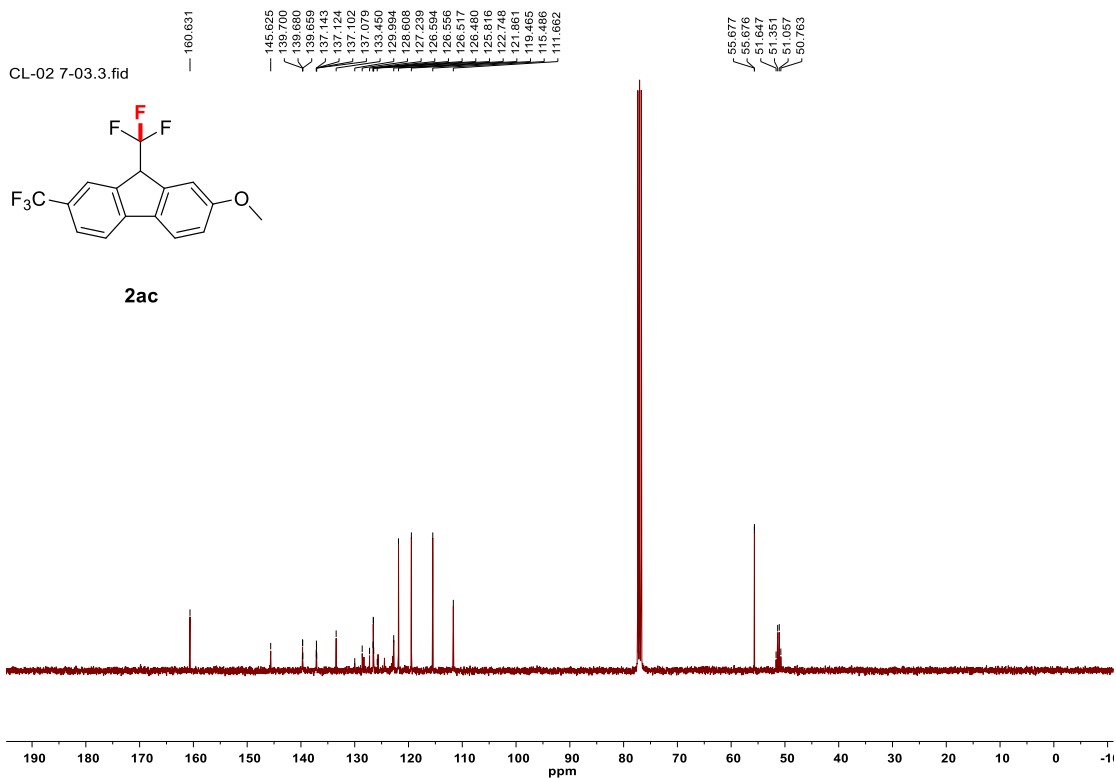

$^{13}\text{C}$  NMR spectrum of **2ac** (101 MHz,  $\text{CDCl}_3$ )

CL-02 7-03.2.fid

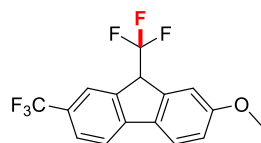

**2ac**

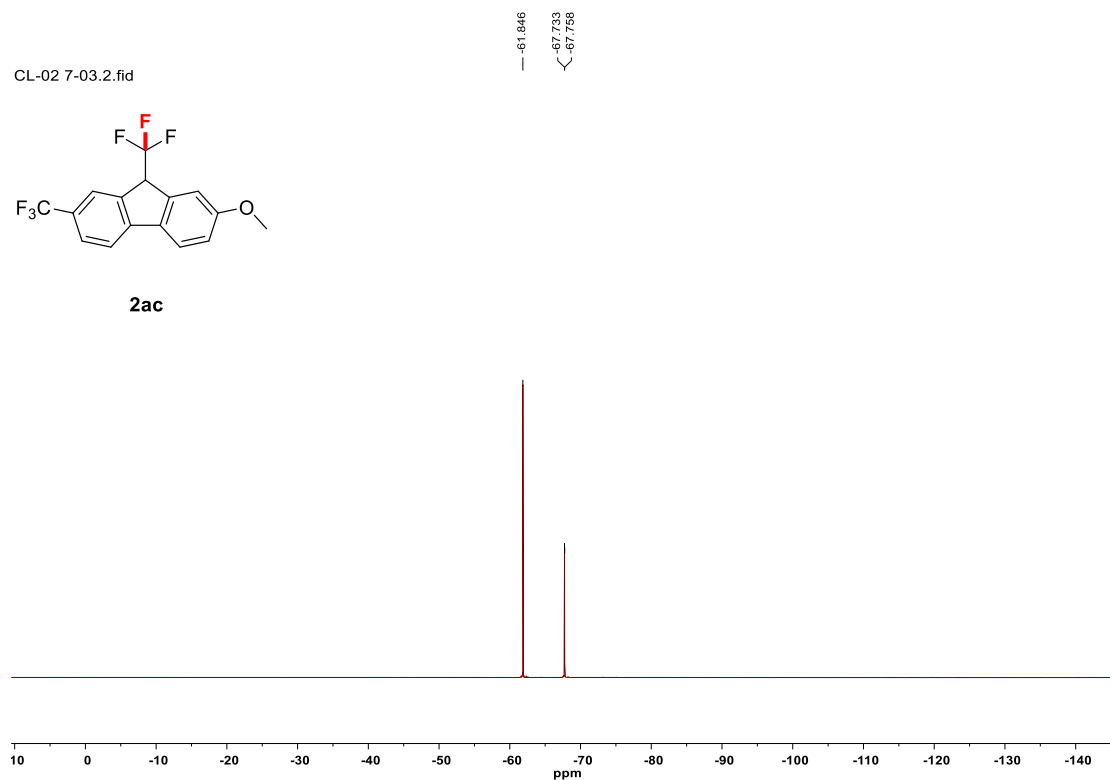

<sup>19</sup>F NMR spectrum of **2ac** (376 MHz, CDCl<sub>3</sub>)

CL-NMR-0824-1.1.fid

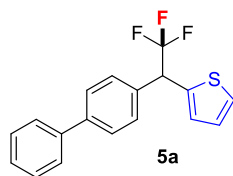

**5a**

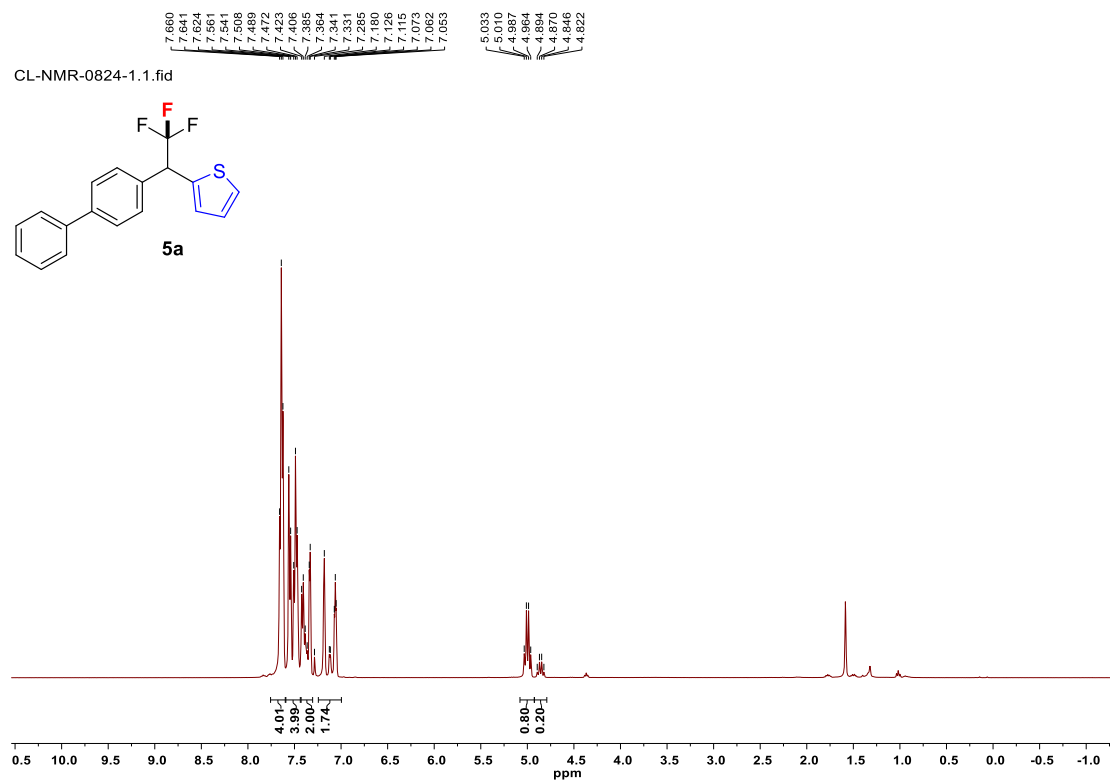

<sup>1</sup>H NMR spectrum of **5a** (400 MHz, CDCl<sub>3</sub>)

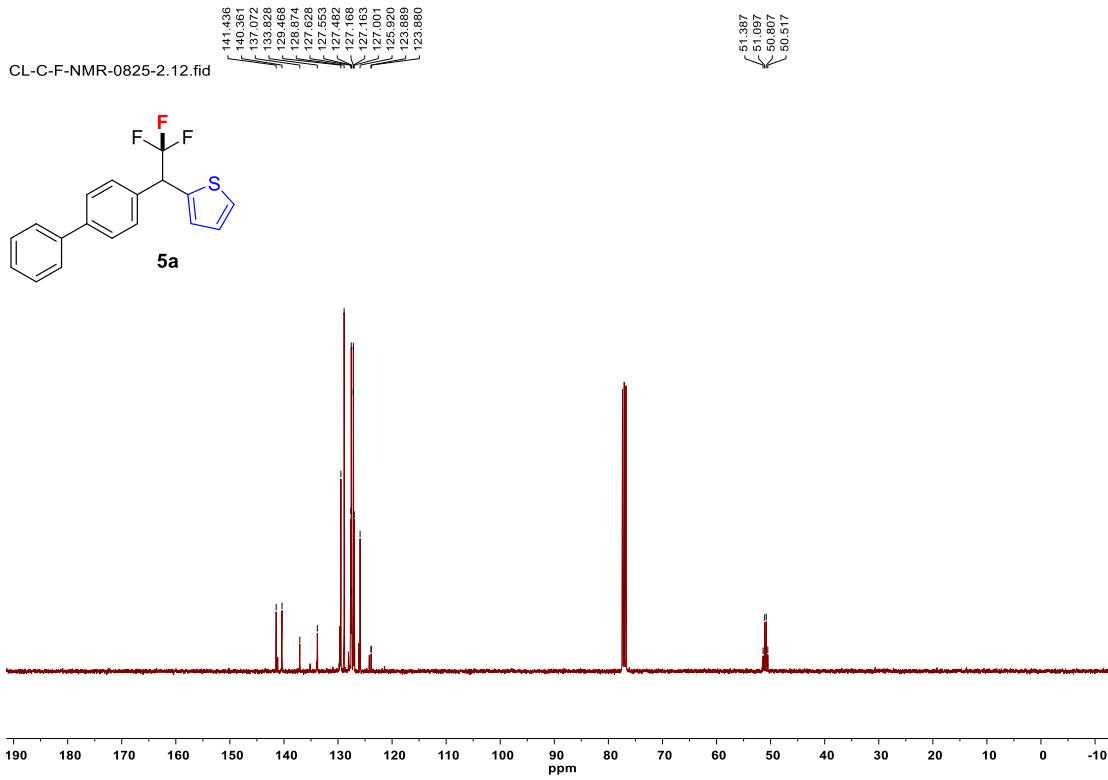

$^{13}\text{C}$  NMR spectrum of **5a** (101 MHz,  $\text{CDCl}_3$ )

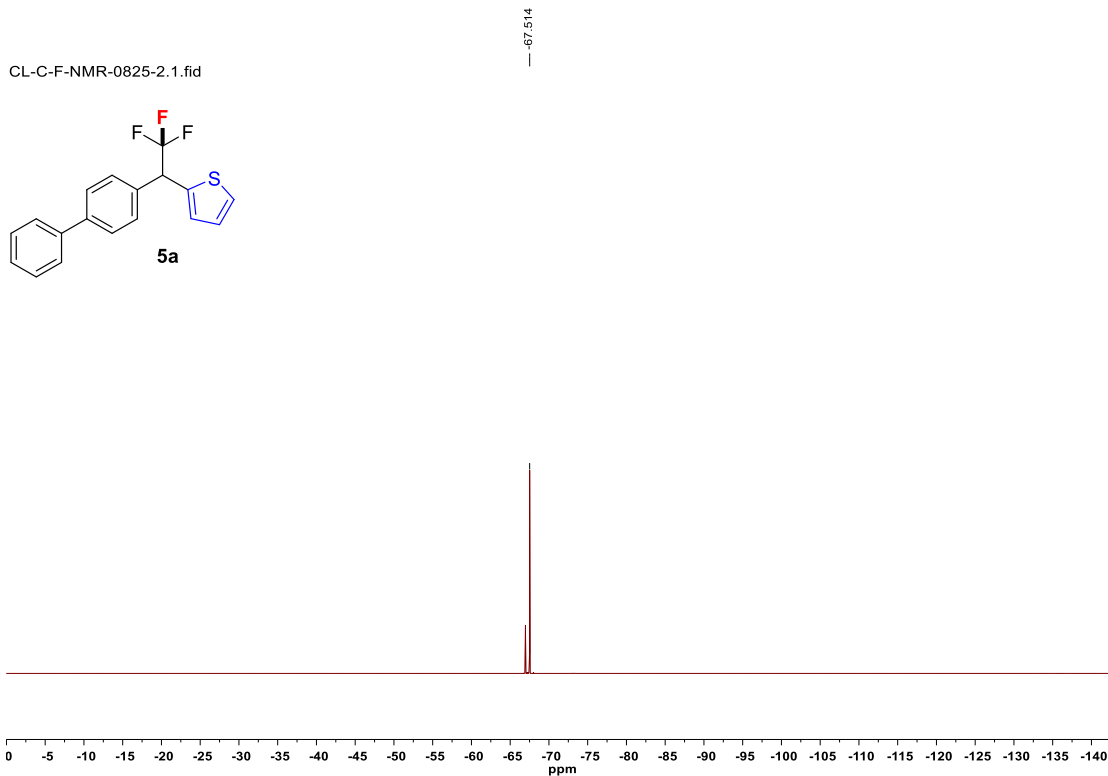

$^{19}\text{F}$  NMR spectrum of **5a** (376 MHz,  $\text{CDCl}_3$ )

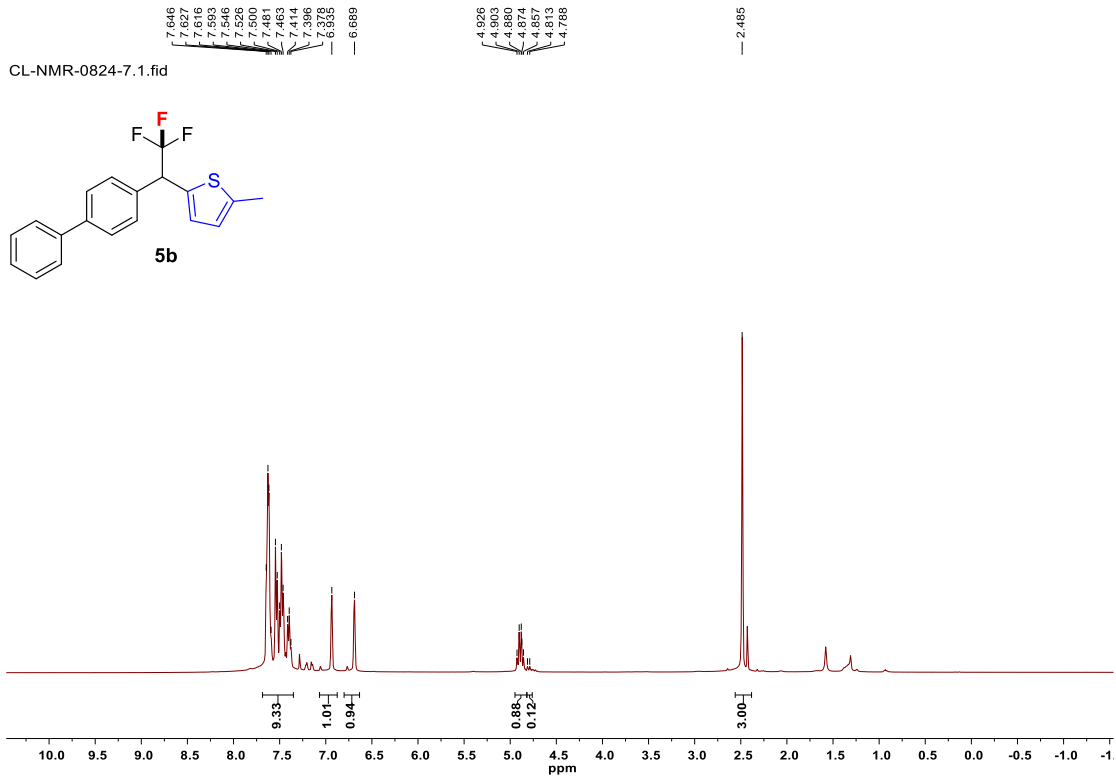

$^1\text{H}$  NMR spectrum of **5b** (400 MHz,  $\text{CDCl}_3$ )

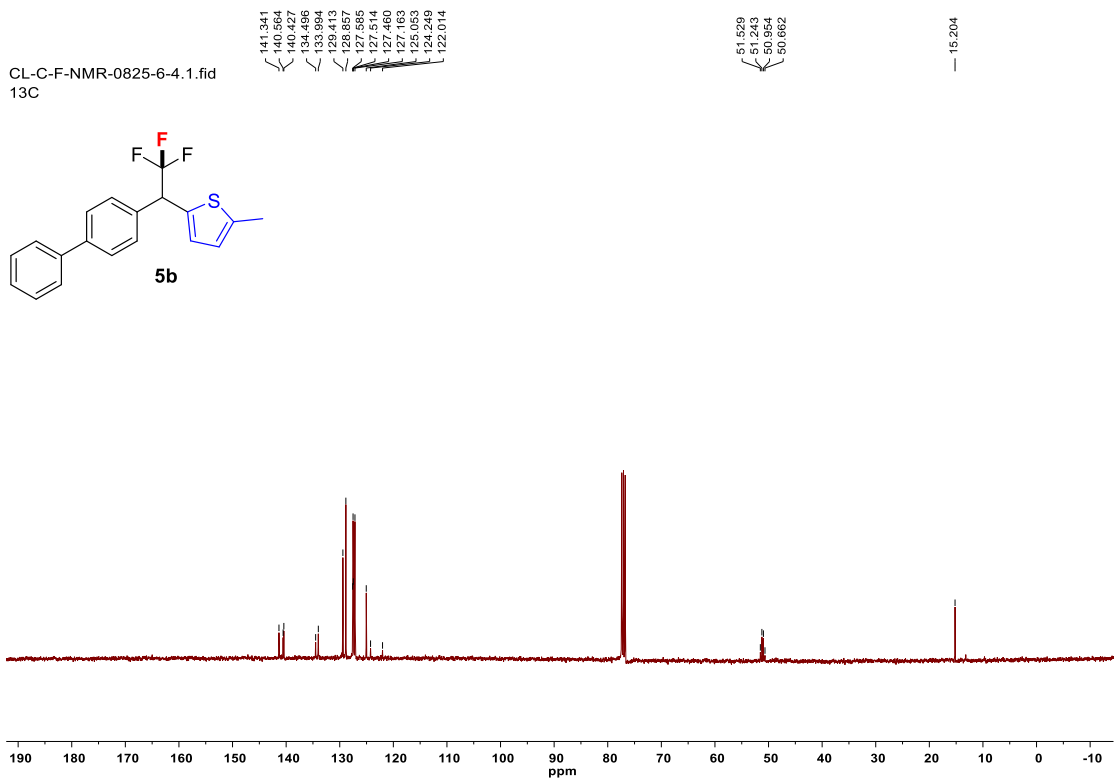

$^{13}\text{C}$  NMR spectrum of **5b** (101 MHz,  $\text{CDCl}_3$ )

CL-C-F-NMR-0825-5.1.fid

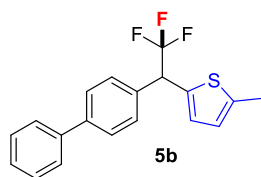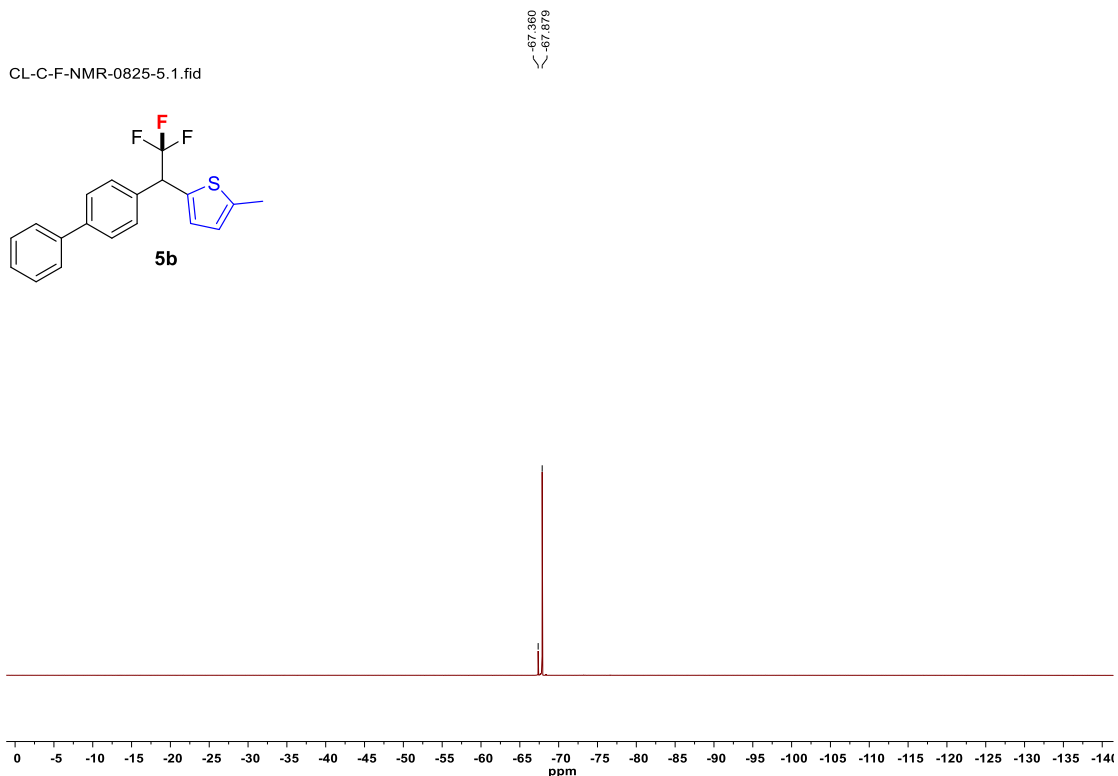

$^{19}\text{F}$  NMR spectrum of **5b** (376 MHz,  $\text{CDCl}_3$ )

CL-NMR-0824-4.1.fid

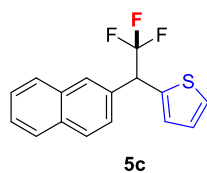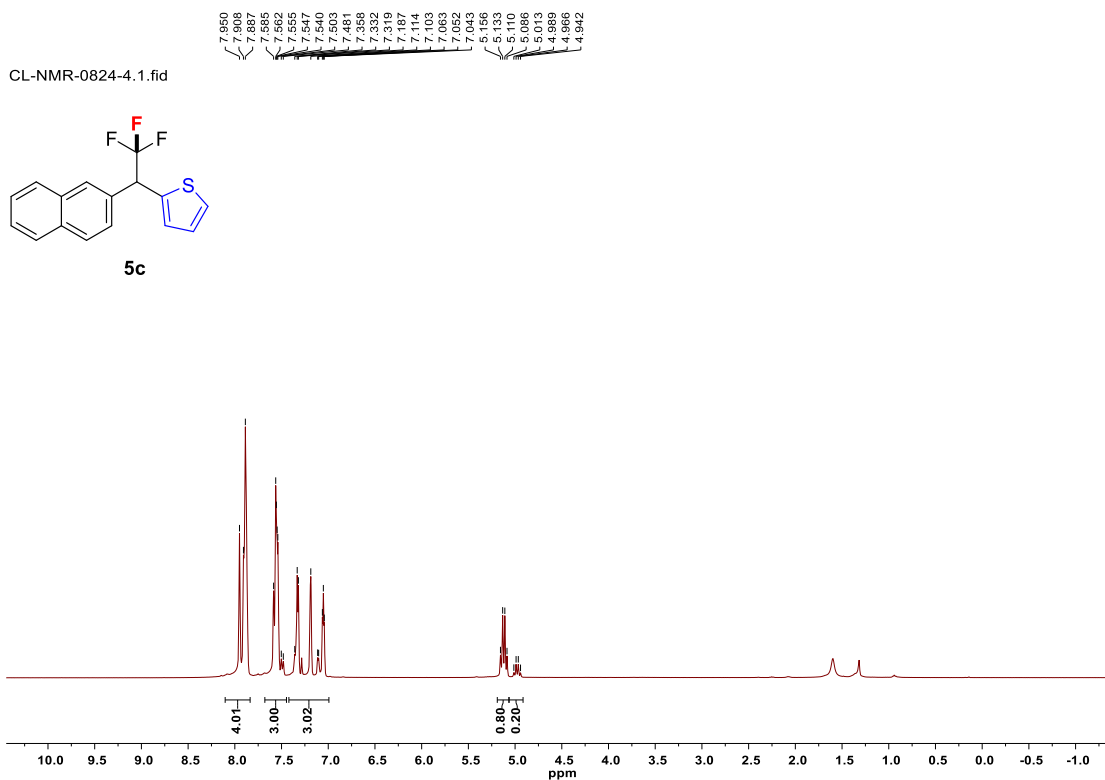

$^1\text{H}$  NMR spectrum of **5c** (400 MHz,  $\text{CDCl}_3$ )

CL-C-F-NMR-0825-3-1.1.fid  
13C

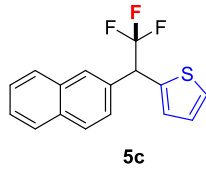

137.235  
133.264  
133.112  
132.716  
128.696  
128.695  
128.192  
127.735  
127.601  
127.006  
126.892  
126.892  
126.378  
125.993

51.853  
51.563  
51.273  
50.984

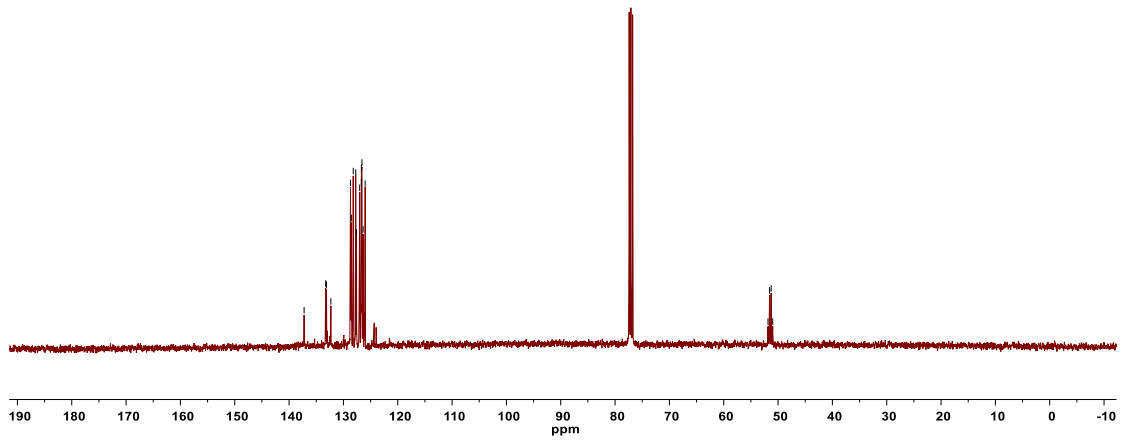

$^{13}\text{C}$  NMR spectrum of **5c** (101 MHz,  $\text{CDCl}_3$ )

CL-C-F-NMR-0825-2.11.fid

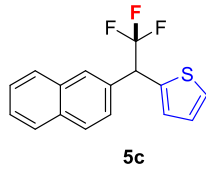

-67.514

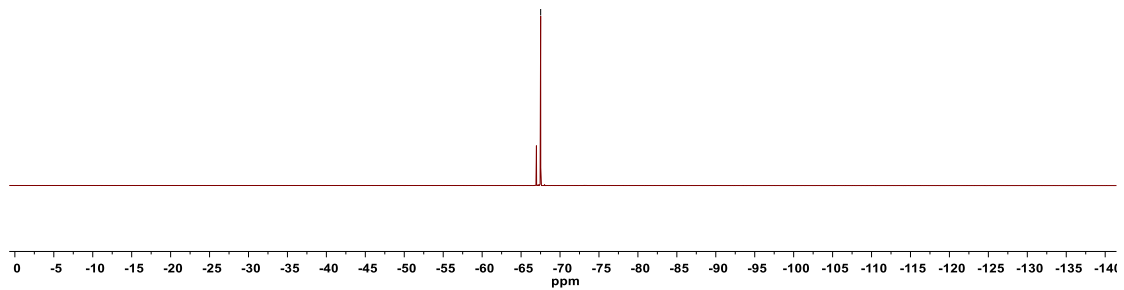

$^{19}\text{F}$  NMR spectrum of **5c** (376 MHz,  $\text{CDCl}_3$ )

CL-NMR-0824-5.1.fid

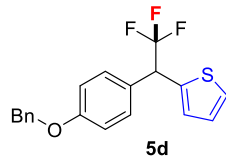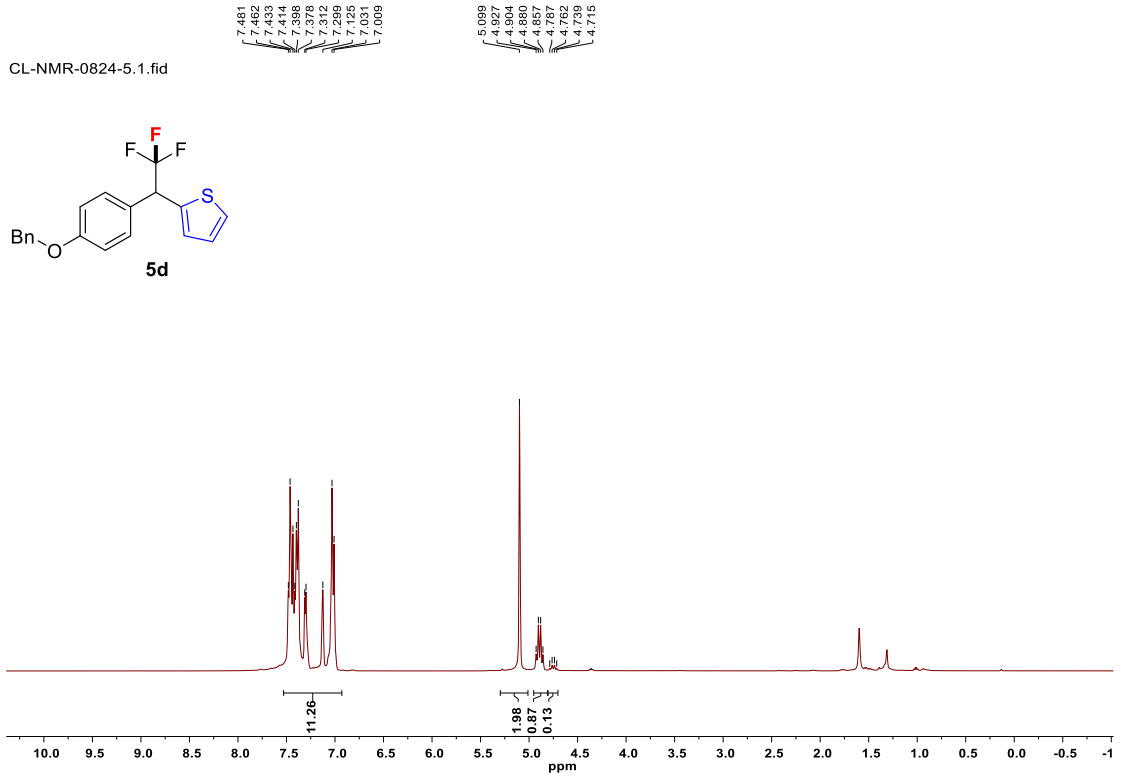

<sup>1</sup>H NMR spectrum of **5d** (400 MHz, CDCl<sub>3</sub>)

CL-C-F-NMR-0825-4-2.1.fid  
13C

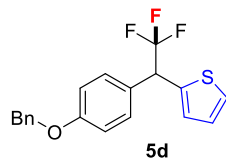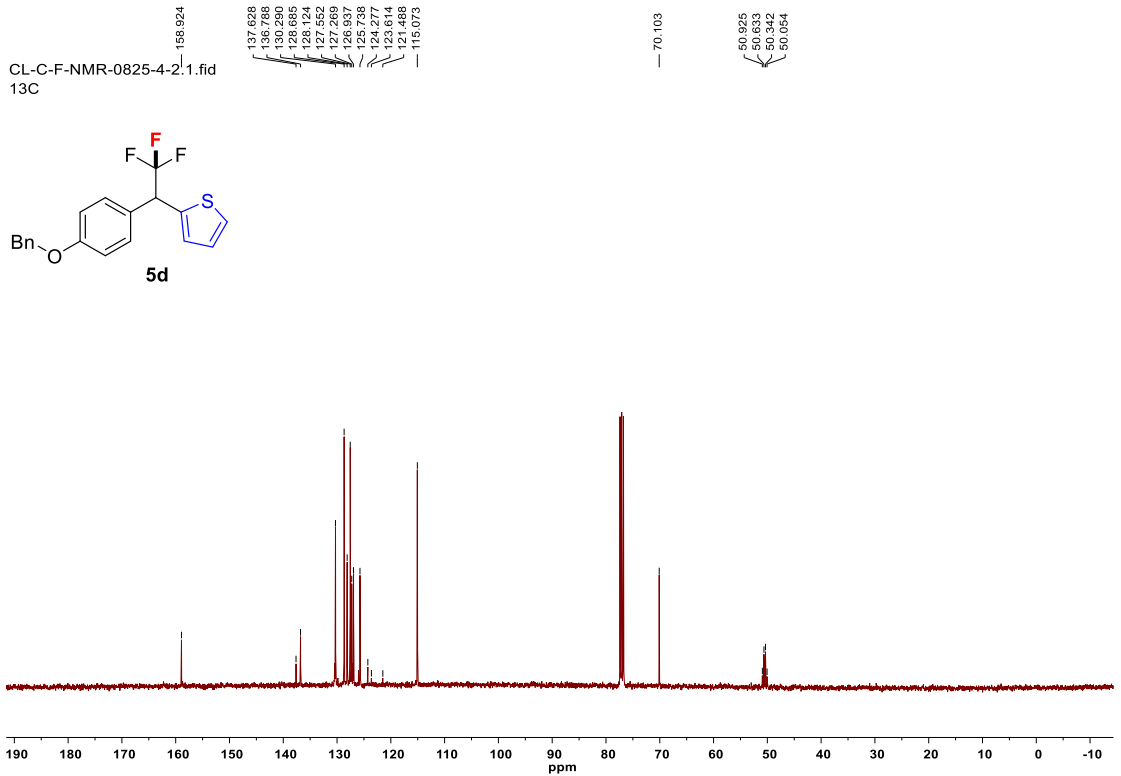

<sup>13</sup>C NMR spectrum of **5d** (101 MHz, CDCl<sub>3</sub>)



CL-C-F-NMR-0825-6.1.fid

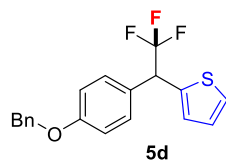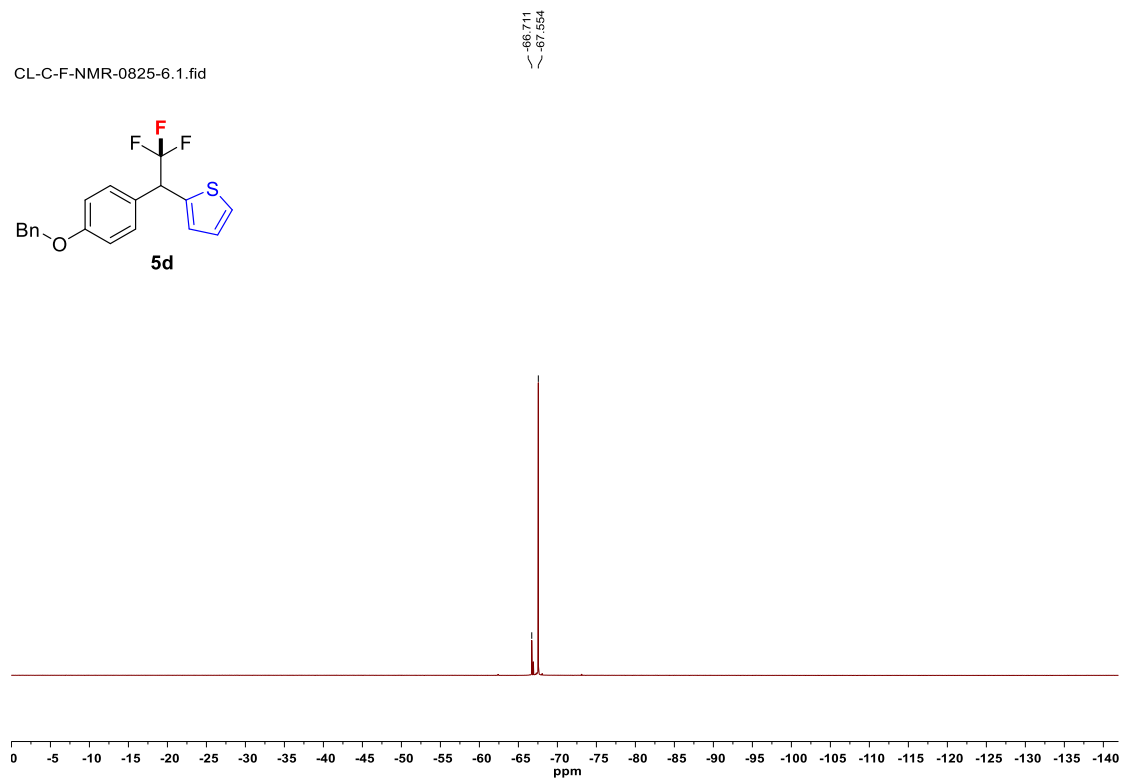

<sup>19</sup>F NMR spectrum of **5d** (376 MHz, CDCl<sub>3</sub>)

CL-NMR-0824-3.1.fid

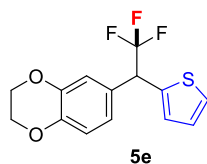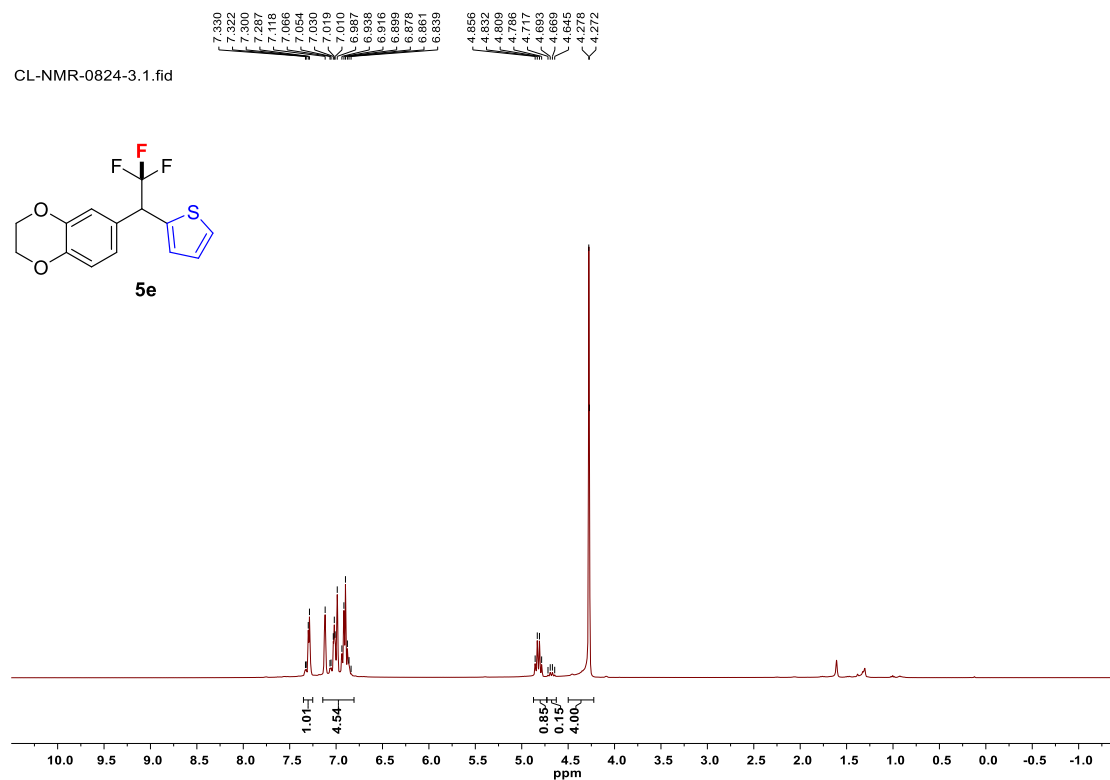

<sup>1</sup>H NMR spectrum of **5e** (400 MHz, CDCl<sub>3</sub>)

CL-C-F-NMR-0825-1.12.fid

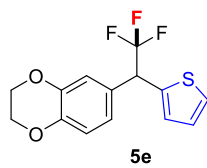

143.773  
143.558  
137.350  
127.940  
127.248  
126.912  
125.711  
123.540  
123.590  
122.125  
118.007  
117.507

64.349  
64.316  
50.946  
50.655  
50.365  
50.075

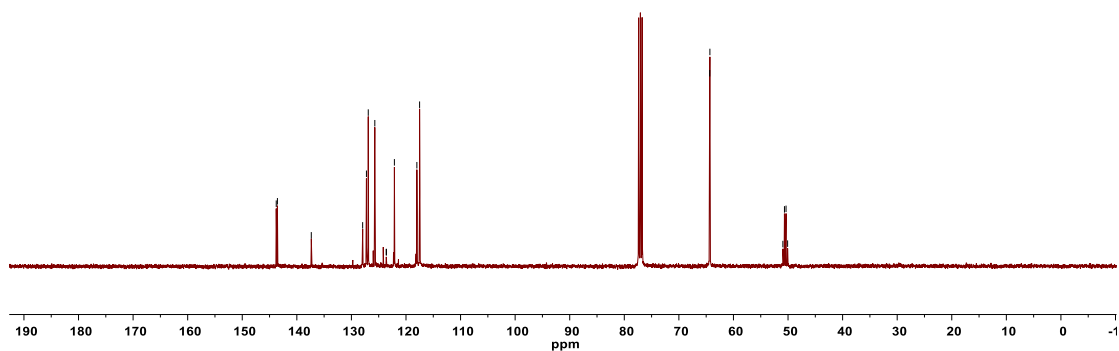

CL-C-F-NMR-0825-1.11.fid

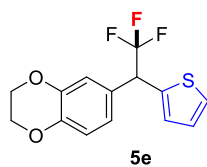

-67.863

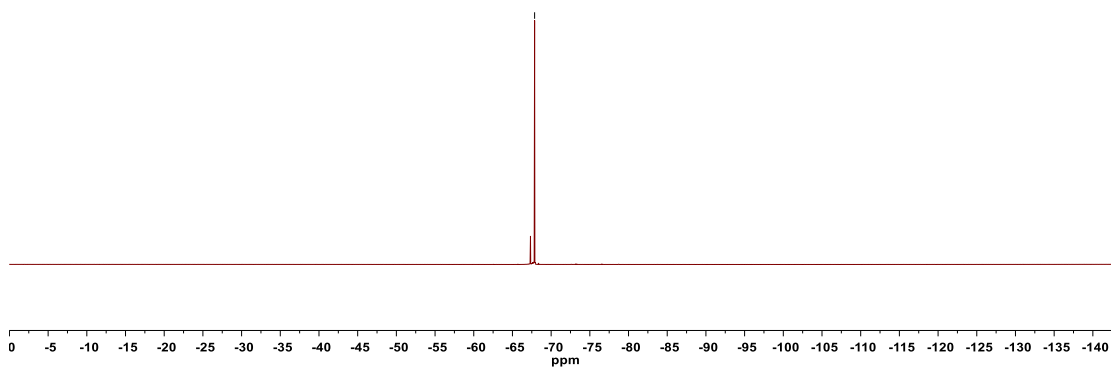

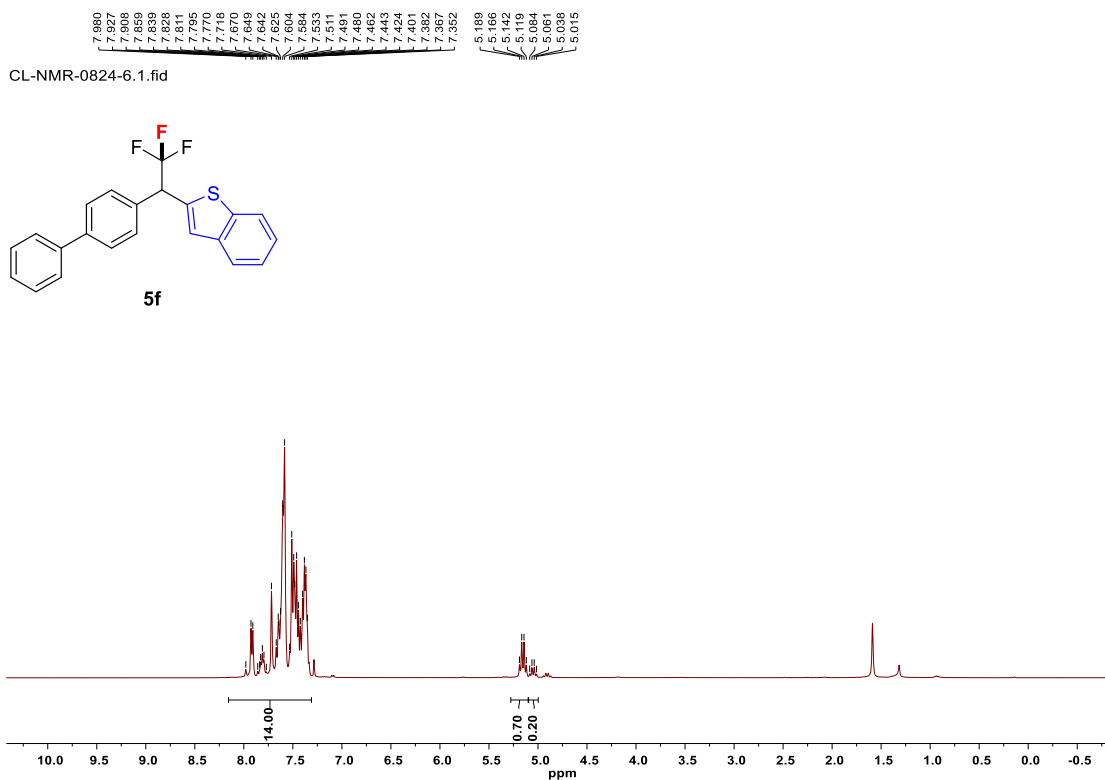

<sup>1</sup>H NMR spectrum of **5f** (400 MHz, CDCl<sub>3</sub>)

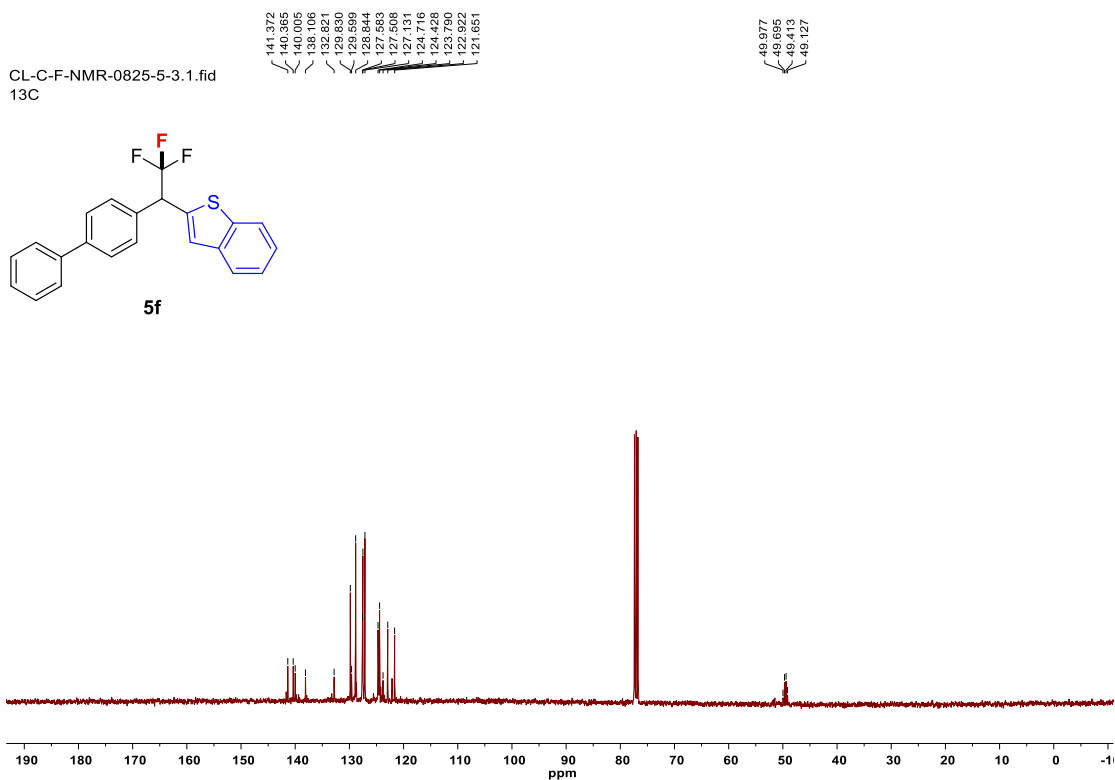

<sup>13</sup>C NMR spectrum of **5f** (101 MHz, CDCl<sub>3</sub>)

CL-C-F-NMR-0825-4.1.fid

—66.801

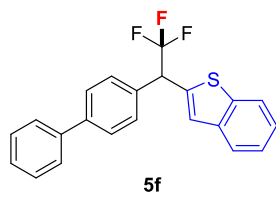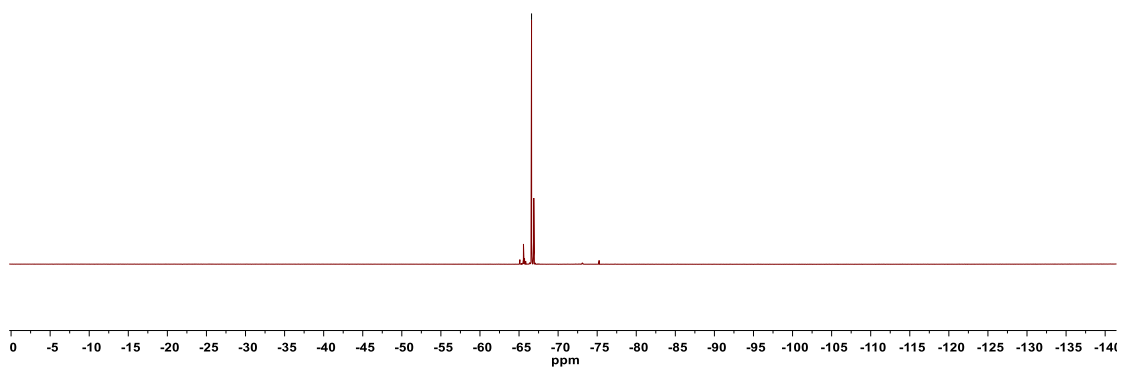

<sup>19</sup>F NMR spectrum of **5f** (376 MHz, CDCl<sub>3</sub>)

CL-NMR-0824-8.1.fid

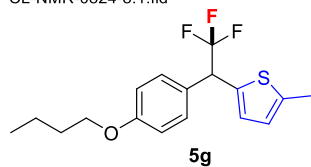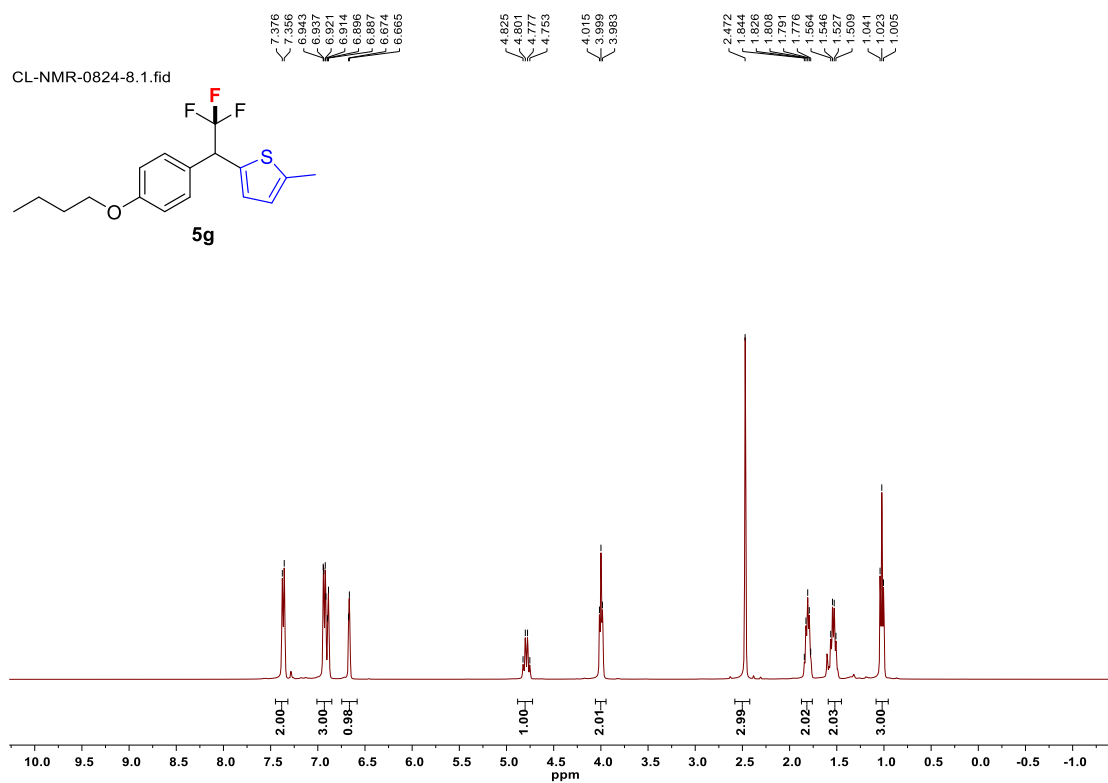

<sup>1</sup>H NMR spectrum of **5g** (400 MHz, CDCl<sub>3</sub>)

CL-C-F-NMR-0825-7-5.1.fid  
13C

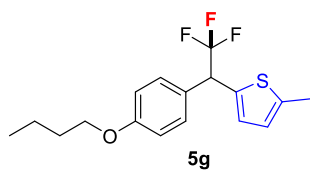

140.291  
135.186  
130.137  
127.142  
126.863  
124.958  
124.346  
114.650  
-67.710  
-51.046  
-50.757  
-50.469  
-50.180  
-31.324  
-19.280  
-15.153  
-13.854

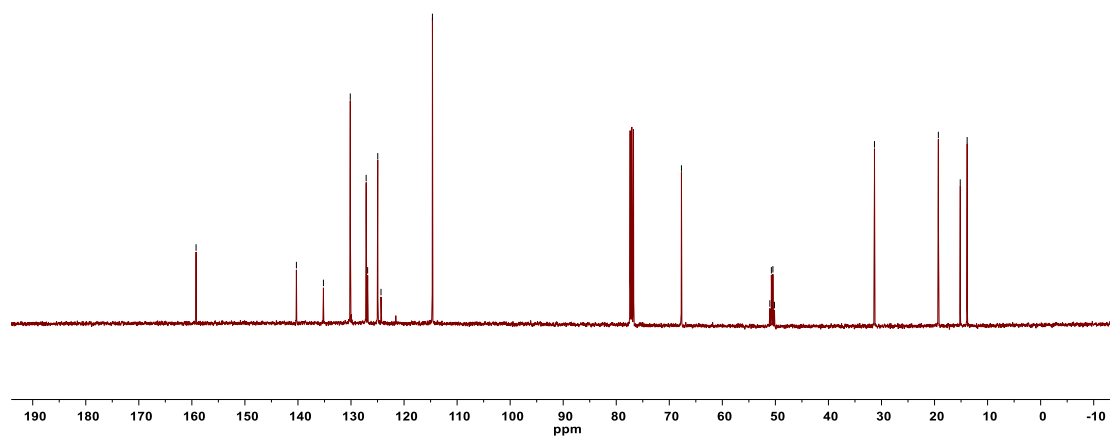

$^{13}\text{C}$  NMR spectrum of **5g** (101 MHz,  $\text{CDCl}_3$ )

CL-C-F-NMR-0825-3.1.fid

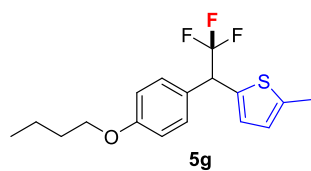

-67.929

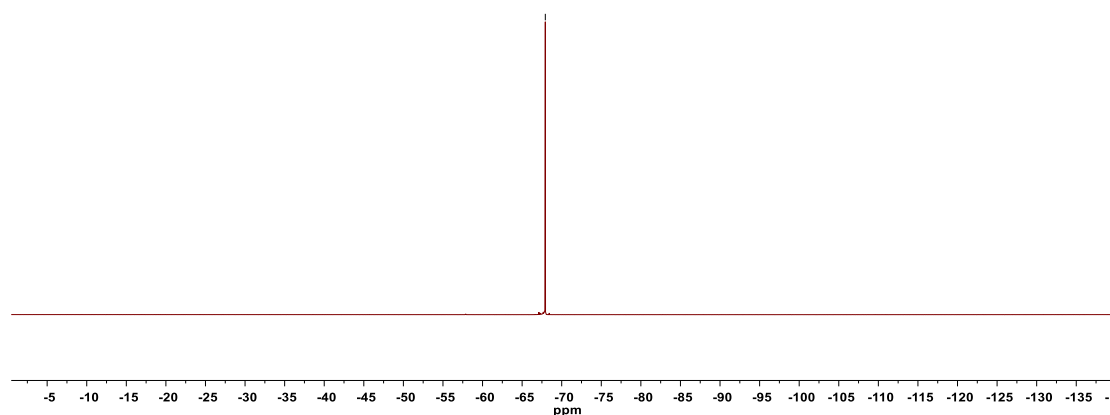

$^{19}\text{F}$  NMR spectrum of **5g** (376 MHz,  $\text{CDCl}_3$ )
